# Supplementary material
Source: PubMed Central journal article supplement (PMC2758928)
Supplement: NIHMS147483-supplement-1_si_001.pdf [file NIHMS147483-supplement-1_si_001.pdf]

## Asymmetric Carbon–Carbon Bond Formation $\gamma$ to a Carbonyl Group: Phosphine-Catalyzed Addition of Nitromethane to Allenes

Sean W. Smith and Gregory C. Fu\*

Department of Chemistry, Massachusetts Institute of Technology, Cambridge, Massachusetts  
02139

## SUPPORTING INFORMATION

## Table of Contents

|      |                                                                           |      |
|------|---------------------------------------------------------------------------|------|
| I.   | Preparation of Allenes                                                    | S-1  |
| II.  | Phosphine-Catalyzed Asymmetric $\gamma$ Additions                         | S-7  |
| III. | Determination of Absolute Stereochemistry                                 | S-15 |
| IV.  | Data ( $^1\text{H}$ NMR spectra and HPLC traces for reactions with (S)-1) | S-16 |

## I. Preparation of Allenes

The yields have not been optimized.

**Synthesis of Allenes (representative procedure):** A 300-mL flask was charged with a phosphorane (14.5 g, 40.0 mmol), evacuated, and back-filled with argon.  $\text{CH}_2\text{Cl}_2$  (200 mL) and  $\text{Et}_3\text{N}$  (6.1 mL, 40 mmol) were added via syringe, and the solution was cooled to  $-78\text{ }^\circ\text{C}$ . The acid chloride (40.0 mmol) was then added dropwise via syringe over five min. The solution was allowed to warm to room temperature over 3-4 hours, and then the reaction was quenched by the addition of silica gel. After removal of the solvent on a rotary evaporator, the product (adsorbed on silica) was loaded onto a pre-packed column of silica gel and purified via flash chromatography (hexanes/ethyl acetate), which furnished the allene as an oil.

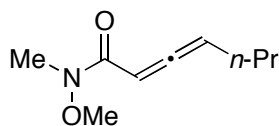

**(±)-*N*-Methoxy-*N*-methylhepta-2,3-dienamide.** Prepared from *N*-methoxy-*N*-methyl-2-(triphenylphosphoranylidene)acetamide and pentanoyl chloride via the

representative procedure (purification by flash chromatography: 25% EtOAc in hexanes; 40% yield).

$^1\text{H}$  NMR ( $\text{CDCl}_3$ , 500 MHz)  $\delta$  6.15 (quintet,  $J = 2.9$  Hz, 1H), 5.64 (q,  $J = 6.8$  Hz, 1H), 3.71 (s, 3H), 3.23 (s, 3H), 2.14-2.09 (m, 2H), 1.49 (sextet,  $J = 7.4$  Hz, 2H), 0.95 (t,  $J = 7.3$  Hz, 3H).

$^{13}\text{C}$  NMR ( $\text{CDCl}_3$ , 125 MHz)  $\delta$  212.2, 166.1, 95.2, 86.3, 61.5, 32.6, 29.7, 22.2, 13.6.

IR (film) 3567, 3291, 3042, 2961, 2935, 2873, 2361, 2339, 1958, 1653, 1463, 1424, 1364  $\text{cm}^{-1}$ .

LRMS (ES+) calcd for  $\text{C}_9\text{H}_{16}\text{NO}_2$  ( $\text{M}+\text{H}^+$ ) 170, found 170.

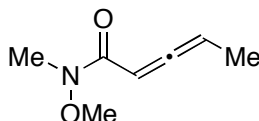

**(±)-N-Methoxy-N-methylpenta-2,3-dienamide.** Prepared from *N*-methoxy-*N*-methyl-2-(triphenylphosphoranylidene)acetamide and propionyl chloride via the representative procedure (purification by flash chromatography: 25% EtOAc in hexanes; 33% yield).

$^1\text{H}$  NMR ( $\text{CDCl}_3$ , 500 MHz)  $\delta$  6.20-6.10 (m, 1H), 5.61 (quintet,  $J = 7.3$  Hz, 1H), 3.71 (s, 3H), 3.23 (s, 3H), 1.80-1.76 (m, 3H).

$^{13}\text{C}$  NMR ( $\text{CDCl}_3$ , 125 MHz)  $\delta$  212.9, 166.1, 90.3, 85.9, 61.8, 32.7, 13.1.

IR (film) 3567, 2974, 2936, 2361, 2339, 1960, 1653, 1457, 1421, 1358  $\text{cm}^{-1}$ .

LRMS (ES+) calcd for  $\text{C}_7\text{H}_{12}\text{NO}_2$  ( $\text{M}+\text{H}^+$ ) 142, found 142.

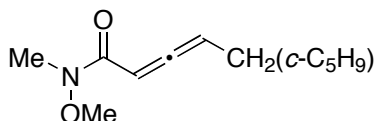

**(±)-5-Cyclopentyl-N-methoxy-N-methylpenta-2,3-dienamide.** Prepared from *N*-methoxy-*N*-methyl-2-(triphenylphosphoranylidene)acetamide and 3-cyclopentylpropanoyl chloride via the representative procedure (purification by flash chromatography: 25% EtOAc in hexanes; 41% yield).

$^1\text{H}$  NMR ( $\text{CDCl}_3$ , 500 MHz)  $\delta$  6.16-6.12 (m, 1H), 5.63 (q,  $J = 7.3$  Hz, 1H), 3.71 (s, 3H), 3.26 (s, 3H), 2.14 (dt,  $J = 7.2, 2.8$  Hz, 2H), 1.95 (septet,  $J = 7.6$  Hz, 1H), 1.83-1.75 (m, 2H), 1.64-1.47 (m, 4H), 1.22-1.14 (2H).

$^{13}\text{C}$  NMR ( $\text{CDCl}_3$ , 125 MHz)  $\delta$  212.6, 166.2, 94.8, 85.9, 61.8, 39.7, 34.2, 32.7, 32.4, 25.4.

IR (film) 3290, 2948, 2867, 2361, 2339, 1654, 1424, 1363  $\text{cm}^{-1}$ .

LRMS (ES+) calcd for  $\text{C}_{12}\text{H}_{20}\text{NO}_2$  ( $\text{M}+\text{H}^+$ ) 210, found 210.

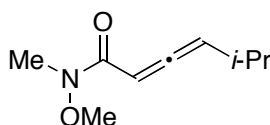

**(±)-N-Methoxy-N,5-dimethylhexa-2,3-dienamide.** Prepared from *N*-methoxy-*N*-methyl-2-(triphenylphosphoranylidene)acetamide and isovaleroyl chloride via the representative procedure (purification by flash chromatography: 25% EtOAc in hexanes; 44% yield).

$^1\text{H}$  NMR ( $\text{CDCl}_3$ , 500 MHz)  $\delta$  6.20 (q,  $J$  = 3.1 Hz, 1H), 5.66 (t,  $J$  = 6.1 Hz, 1H), 3.71 (s, 3H), 3.23 (s, 3H), 2.52-2.42 (m, 1H), 1.08 (d,  $J$  = 6.7 Hz, 6H).

$^{13}\text{C}$  NMR ( $\text{CDCl}_3$ , 125 MHz)  $\delta$  211.1, 166.1, 102.6, 87.4, 61.8, 32.6, 27.7, 22.5, 22.3.

IR (film) 3291, 2963, 2937, 2871, 2361, 2339, 1957, 1653, 1465, 1384  $\text{cm}^{-1}$ .

LRMS (ES+) calcd for  $\text{C}_9\text{H}_{16}\text{NO}_2$  ( $\text{M}+\text{H}^+$ ) 170, found 170.

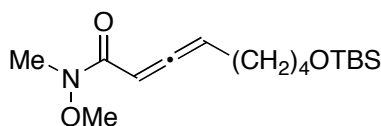

**(±)-8-(*tert*-Butyldimethylsilyloxy)-N-methoxy-N-methylocta-2,3-dienamide.**

Prepared from *N*-methoxy-*N*-methyl-2-(triphenylphosphoranylidene)acetamide and 6-(*tert*-butyldimethylsilyloxy)hexanoyl chloride via the representative procedure (purification by flash chromatography: 25% EtOAc in hexanes; 10% yield).

$^1\text{H}$  NMR ( $\text{CDCl}_3$ , 300 MHz)  $\delta$  6.09-6.06 (m, 1H), 5.57 (t,  $J$  = 6.7 Hz, 1H), 3.63 (s, 3H), 3.56-3.52 (m, 2H), 3.16 (s, 3H), 2.15-2.05 (m, 2H), 1.60-1.38 (m, 4H), 0.81 (s, 9H), -0.04 (s, 6H).

$^{13}\text{C}$  NMR ( $\text{CDCl}_3$ , 125 MHz)  $\delta$  212.2, 166.1, 95.5, 86.5, 63.0, 61.8, 32.7, 32.3, 27.4, 26.1, 25.3, 18.5, -5.1.

IR (film) 3308, 2935, 2857, 2361, 2340, 1959, 1658, 1472  $\text{cm}^{-1}$ .

LRMS (ES+) calcd for  $\text{C}_{16}\text{H}_{32}\text{NO}_3\text{Si}$  ( $\text{M}+\text{H}^+$ ) 314, found 314.

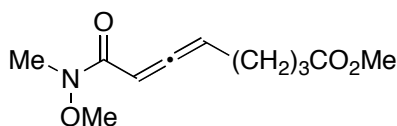

**(±)-Methyl 8-(methoxy(methyl)amino)-8-oxoocta-5,6-dienoate.** Prepared from *N*-methoxy-*N*-methyl-2-(triphenylphosphoranylidene)acetamide and methyl adipoyl chloride via the representative procedure (purification by flash chromatography: 25% EtOAc in hexanes; 25% yield).

$^1\text{H}$  NMR ( $\text{CDCl}_3$ , 500 MHz)  $\delta$  6.18 (quintet,  $J$  = 2.9 Hz, 1H), 5.63 (q,  $J$  = 6.7 Hz, 1H), 3.71 (s, 3H), 3.66 (s, 3H), 3.23 (s, 3H), 2.39 (t,  $J$  = 7.4 Hz, 2H), 2.18 (qd,  $J$  = 7.1, 3.0 Hz, 2H), 1.80 (quintet,  $J$  = 7.4 Hz, 2H).

$^{13}\text{C}$  NMR ( $\text{CDCl}_3$ , 125 MHz)  $\delta$  212.3, 173.9, 165.9, 94.7, 86.9, 61.9, 51.7, 33.3, 32.8, 27.1, 24.1.

IR (film) 3282, 2951, 2361, 2339, 1959, 1734, 1653, 1639, 1457  $\text{cm}^{-1}$ .

LRMS (ES+) calcd for  $\text{C}_{11}\text{H}_{18}\text{NO}_4$  ( $\text{M}+\text{H}^+$ ) 228, found 228.

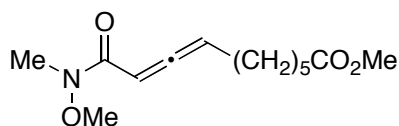

**(±)-Methyl 10-(methoxy(methyl)amino)-10-oxodeca-7,8-dienoate.** Prepared from *N*-methoxy-*N*-methyl-2-(triphenylphosphoranylidene)acetamide and methyl 8-chloro-8-oxooctanoate chloride<sup>1</sup> via the representative procedure (purification by flash chromatography: 25% EtOAc in hexanes; 21% yield).

$^1\text{H}$  NMR ( $\text{CDCl}_3$ , 500 MHz)  $\delta$  6.18-6.14 (m, 1H), 5.52 (q,  $J = 2.3$  Hz, 1H), 3.61 (s, 3H), 3.55 (s, 3H), 3.13 (s, 3H), 2.20 (t,  $J = 7.4$  Hz, 2H), 2.06-2.01 (m, 2H), 1.56-1.49 (m, 2H), 1.42-1.35 (m, 2H), 1.31-1.24 (m, 2H).

$^{13}\text{C}$  NMR ( $\text{CDCl}_3$ , 125 MHz)  $\delta$  212.2, 174.2, 166.0, 95.3, 86.5, 61.8, 51.5, 34.0, 32.7, 28.6, 28.5, 27.4, 24.8.

IR (film) 3288, 2937, 2859, 2361, 2338, 1958, 1734, 1653  $\text{cm}^{-1}$ .

LRMS (ES+) calcd for  $\text{C}_{13}\text{H}_{22}\text{NO}_4$  ( $\text{M}+\text{H}^+$ ) 256, found 256.

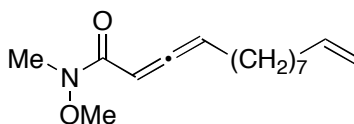

**(±)-*N*-Methoxy-*N*-methyltrideca-2,3,12-trienamide.** Prepared from *N*-methoxy-*N*-methyl-2-(triphenylphosphoranylidene)acetamide and 10-undecenoyl chloride via the representative procedure (purification by flash chromatography: 25% EtOAc in hexanes; 39% yield).

$^1\text{H}$  NMR ( $\text{CDCl}_3$ , 500 MHz)  $\delta$  6.15 (quintet,  $J = 2.9$  Hz, 1H), 5.80 (qt,  $J = 10.3$ , 6.7 Hz, 1H), 5.64 (q,  $J = 6.9$  Hz, 1H), 4.98 (dq,  $J = 17.1$ , 1.6 Hz, 1H), 4.92 (dq,  $J = 10.2$ , 1.2 Hz, 1H), 3.71 (s, 3H), 3.24 (s, 3H), 2.13 (qd,  $J = 7.0$ , 3.0 Hz, 2H), 2.05-2.00 (m, 2H), 1.46 (quintet,  $J = 6.4$  Hz, 2H), 1.40-1.27 (m, 8H).

$^{13}\text{C}$  NMR ( $\text{CDCl}_3$ , 125 MHz)  $\delta$  212.3, 166.1, 139.4, 114.3, 95.7, 86.5, 61.9, 34.0, 29.4, 29.3, 29.23, 29.21, 29.12, 29.10, 27.8.

IR (film) 3075, 2927, 2855, 2361, 2338, 1959, 1653, 1464, 1423, 1362  $\text{cm}^{-1}$ .

LRMS (ES+) calcd for  $\text{C}_{15}\text{H}_{26}\text{NO}_2$  ( $\text{M}+\text{H}^+$ ) 252, found 252.

(1) Schinzer, D.; Limberg, A.; Böhm, O. M. *Chem. Eur. J.* **1996**, 2, 1477–1482.

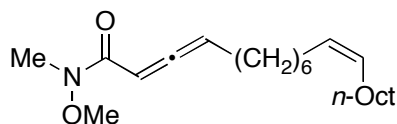

**(±)-(Z)-N-Methoxy-N-methylnonadeca-2,3,10-trienamide.** Prepared from *N*-methoxy-*N*-methyl-2-(triphenylphosphoranylidene)acetamide and oleoyl chloride via the representative procedure (purification by flash chromatography: 25% EtOAc in hexanes; 55% yield).

$^1\text{H}$  NMR ( $\text{CDCl}_3$ , 500 MHz)  $\delta$  6.15 (quintet,  $J = 2.9$  Hz, 1H), 5.64 (q,  $J = 6.9$  Hz, 1H), 5.37-5.30 (m, 2H), 3.71 (s, 3H), 3.24 (s, 3H), 2.16-2.11 (m, 2H), 2.02-1.99 (m, 4H), 1.50 (m, 2H), 1.37-1.22 (m, 18H), 0.88 (t,  $J = 6.9$  Hz, 3H).

$^{13}\text{C}$  NMR ( $\text{CDCl}_3$ , 125 MHz)  $\delta$  212.3, 166.2, 130.1, 129.9, 95.6, 86.4, 61.8, 32.7, 32.1, 29.9, 29.8, 29.7, 29.53, 29.52, 29.2, 29.1, 29.0, 27.8, 27.4, 27.3, 22.9, 14.3.

IR (film) 3300, 3003, 2923, 2853, 2361, 2338, 1959, 1653, 1457, 1420, 1362  $\text{cm}^{-1}$ .

LRMS (ES+) calcd for  $\text{C}_{22}\text{H}_{40}\text{NO}_2$  ( $\text{M}+\text{H}^+$ ) 350, found 350.

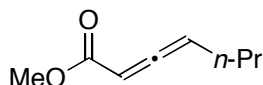

**(±)-Methyl hepta-2,3-dienoate [111425-91-5].** Prepared from methyl (triphenylphosphoranylidene)acetate and pentanoyl chloride via the representative procedure (purification by distillation; 71% yield).

$^1\text{H}$  NMR ( $\text{CDCl}_3$ , 500 MHz)  $\delta$  5.59-5.52 (m, 2H), 3.68 (s, 3H), 2.10-2.05 (m, 2H), 1.48-1.41 (m, 2H), 0.91 (t,  $J = 7.4$  Hz, 3H).

$^{13}\text{C}$  NMR ( $\text{CDCl}_3$ , 125 MHz)  $\delta$  212.6, 166.9, 95.4, 88.0, 52.1, 29.7, 22.1, 13.6.

IR (film) 2960, 2935, 2875, 2361, 2337, 1961, 1723, 1437, 1262  $\text{cm}^{-1}$ .

LRMS (ES+) calcd for  $\text{C}_8\text{H}_{13}\text{O}_2$  ( $\text{M}+\text{H}^+$ ) 141, found 141.

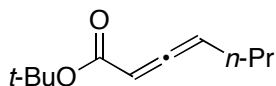

**(±)-tert-Butyl hepta-2,3-dienoate [151860-31-0].** Prepared from (*tert*-butoxycarbonyl-methylene)triphenylphosphorane and pentanoyl chloride via the representative procedure (purification by flash chromatography: 5% EtOAc in hexanes; 38% yield).

$^1\text{H}$  NMR ( $\text{CDCl}_3$ , 500 MHz)  $\delta$  5.55 (q,  $J = 6.9$  Hz, 1H), 5.47 (q,  $J = 2.6$  Hz, 1H), 2.09-2.02 (m, 2H), 1.52-1.42 (m, 11H), 0.95 (t,  $J = 7.3$  Hz, 3H).

$^{13}\text{C}$  NMR ( $\text{CDCl}_3$ , 125 MHz)  $\delta$  212.1, 165.8, 95.0, 89.9, 80.8, 29.8, 28.3, 22.2, 13.7.

IR (film) 3004, 2967, 2934, 2875, 2361, 2338, 1960, 1717, 1368, 1147  $\text{cm}^{-1}$ .  
LRMS (ES+) calcd for  $\text{C}_{11}\text{H}_{19}\text{O}_2$  ( $\text{M}+\text{H}^+$ ) 183, found 183.

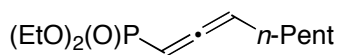

**(±)-Diethyl octa-1,2-dienylphosphonate [344554-28-5].** Prepared according to a literature procedure (purification by flash chromatography: 20 → 100% EtOAc in hexanes; 75% yield).<sup>2</sup>

$^1\text{H}$  NMR ( $\text{CDCl}_3$ , 500 MHz)  $\delta$  5.43 (sextet,  $J = 7.0$  Hz, 1H), 5.29 (sextet,  $J = 3.4$  Hz, 1H), 4.14-4.07 (m, 4H), 2.09 (quintet of doublets,  $J = 7.2, 3.4$  Hz, 2H), 1.46-1.41 (m, 2H), 1.35-1.29 (m, 10H), 1.33 (t,  $J = 7.0$  Hz, 3H).

$^{13}\text{C}$  NMR ( $\text{CDCl}_3$ , 125 MHz)  $\delta$  211.9, 92.4, 80.8, 79.2, 62.2, 31.2, 28.67, 28.64, 27.4, 22.5, 16.4, 14.1.

IR (film) 3482, 2980, 2958, 2931, 2872, 2859, 2360, 2338, 1955, 1258  $\text{cm}^{-1}$ .  
LRMS (ES+) calcd for  $\text{C}_{12}\text{H}_{24}\text{O}_3\text{P}$  ( $\text{M}+\text{H}^+$ ) 247, found 247.

---

(2) Altenbach, H.-J.; Korff, R. *Tetrahedron Lett.* **1981**, 22, 5175–5178.

## II. Phosphine-Catalyzed Asymmetric $\gamma$ Additions

**General Procedure.** In a glovebox, catalyst (S)-1 (29 mg, 0.075 mmol; 0.10 equiv) and phenol (7.0 mg, 0.075 mmol; 0.10 equiv) were added to an oven-dried 20-mL vial. These solids were dissolved in anhydrous dioxane (15 mL), and then nitromethane (225  $\mu$ L, 4.15 mmol; 5.5 equiv) and the allene (0.75 mmol; 1.0 equiv) were added via syringe. The vial was capped and removed from the glovebox, and the reaction mixture was stirred at room temperature for 15 h. The solvent was then evaporated, and the product was purified by flash chromatography.

**Glovebox-free Procedure (Table 2, entry 2).** On a benchtop, catalyst (S)-1 (43.5 mg, 0.113 mmol; 0.15 equiv; with 10% (S)-1, a small amount of unreacted allene was observed after 15 h) and phenol (10.5 mg, 0.113 mmol; 0.15 equiv) were added to an oven-dried 20-mL vial. The vial was capped with a septum, and then it was evacuated and refilled with argon (three cycles). Next, anhydrous dioxane (15 mL), nitromethane (225  $\mu$ L, 4.15 mmol; 5.5 equiv), and ( $\pm$ )-N-methoxy-N-methylhepta-2,3-dienamide (127 mg, 0.75 mmol; 1.0 equiv) were added in order via syringe through the septum. The reaction mixture was stirred at room temperature for 15 h. It was then concentrated and purified by flash chromatography (25% EtOAc in pentane), which afforded the desired product as a colorless oil (140 mg, 81% yield) with 93% ee.

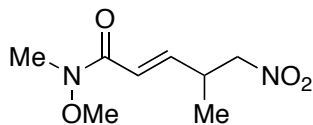

**(E)-N-Methoxy-N-4-dimethyl-5-nitropent-2-enamide (Table 2, entry 1).** The compound was prepared according to the general procedure with ( $\pm$ )-N-methoxy-N-methylpenta-2,3-dienamide (106 mg, 0.75 mmol). After purification by flash chromatography (30% EtOAc in hexanes), the title compound was isolated as a colorless oil (144 mg, 95% yield) with 97% ee.

$[\alpha]_D^{22} = -45$  ( $c = 1.0$ ,  $\text{CHCl}_3$ ). HPLC analysis of the product: Daicel CHIRALPAK OD-H column; 5.0% *i*-PrOH in hexanes; 1.0 mL/min; retention times: 38.7 min (minor), 44.5 min (major).

The second run was performed with (R)-1. The product was isolated as a colorless oil (140 mg, 93% yield) with 97% ee.

$^1\text{H}$  NMR ( $\text{CDCl}_3$ , 500 MHz)  $\delta$  6.73 (dd,  $J = 15.4, 7.8$  Hz, 1H), 6.45 (d,  $J = 15.4$  Hz, 1H), 4.37 (dd,  $J = 12.2, 7.7$  Hz, 1H), 4.31 (dd,  $J = 12.2, 7.0$  Hz, 1H), 3.63 (s, 3H), 3.18 (s, 3H), 3.24-3.15 (m, 1H), 1.15 (d,  $J = 6.8$  Hz, 3H).

$^{13}\text{C}$  NMR ( $\text{CDCl}_3$ , 125 MHz)  $\delta$  165.9, 145.2, 120.6, 79.9, 62.0, 35.8, 32.4, 17.0.

IR (film) 3287, 2972, 2361, 2339, 1669, 1558  $\text{cm}^{-1}$ .

LRMS (ES+) calcd for  $\text{C}_8\text{H}_{15}\text{N}_2\text{O}_4$  ( $\text{M}+\text{H}^+$ ) 203, found 203.

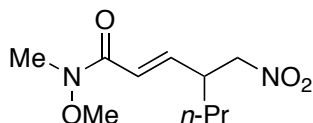

**(E)-N-Methoxy-N-methyl-4-(nitromethyl)hept-2-enamide (Table 2, entry 2).** The compound was prepared according to the general procedure with (±)-N-methoxy-N-methylhepta-2,3-dienamide (127 mg, 0.75 mmol). After purification by flash chromatography (30% EtOAc in hexanes), the title compound was isolated as a colorless oil (137 mg, 80% yield) with 93% ee.

$[\alpha]_D^{22} = -30$  ( $c = 1.0$ ,  $\text{CHCl}_3$ ). HPLC analysis of the product: Daicel CHIRALPAK OD-H column; 5.0% *i*-PrOH in hexanes; 1.0 mL/min; retention times: 24.5 min (major), 28.7 min (minor).

The second run was performed with (*R*)-1. The product was isolated as a colorless oil (141 mg, 82% yield) with 93% ee.

$^1\text{H}$  NMR ( $\text{CDCl}_3$ , 500 MHz)  $\delta$  6.63 (dd,  $J = 15.4, 9.1$  Hz, 1H), 6.44 (d,  $J = 15.4$  Hz, 1H), 4.38 (dd,  $J = 12.3, 5.9$  Hz, 1H), 4.30 (dd,  $J = 12.2, 8.9$  Hz, 1H), 3.61 (s, 3H), 3.17 (s, 3H), 3.09-3.01 (m, 1H), 1.46-1.17 (m, 4H), 0.85 (t,  $J = 7.2$  Hz, 3H).

$^{13}\text{C}$  NMR ( $\text{CDCl}_3$ , 125 MHz)  $\delta$  165.7, 144.2, 122.0, 79.1, 62.0, 41.3, 33.6, 32.4, 20.0, 13.9.

IR (film) 2961, 2935, 2874, 2361, 2338, 1668, 1635, 1558, 1379  $\text{cm}^{-1}$ .

LRMS (ES+) calcd for  $\text{C}_{10}\text{H}_{19}\text{N}_2\text{O}_4$  ( $\text{M}+\text{H}^+$ ) 231, found 231.

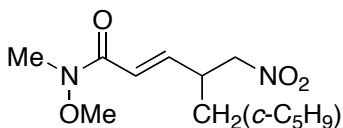

**(E)-5-Cyclopentyl-N-methoxy-N-methyl-4-(nitromethyl)pent-2-enamide (Table 2, entry 3).** The compound was prepared according to the general procedure with (±)-5-cyclopentyl-N-methoxy-N-methylpenta-2,3-dienamide (157 mg, 0.75 mmol). After purification by flash chromatography (30% EtOAc in hexanes), the title compound was isolated as a colorless oil (146 mg, 72% yield) with 87% ee.

$[\alpha]_D^{22} = -3.5$  ( $c = 1.0$ ,  $\text{CHCl}_3$ ). HPLC analysis of the product: Daicel CHIRALPAK OD-H column; 3.0% *i*-PrOH in hexanes; 1.0 mL/min; retention times: 33.7 min (major), 46.2 min (minor).

The second run was performed with (*R*)-1. The product was isolated as a colorless oil (152 mg, 75% yield) with 86% ee.

$^1\text{H}$  NMR ( $\text{CDCl}_3$ , 500 MHz)  $\delta$  6.65 (dd,  $J = 15.4, 9.4$  Hz, 1H), 6.47 (d,  $J = 15.4$  Hz, 1H), 4.38 (dd,  $J = 12.3, 5.8$  Hz, 1H), 4.30 (dd,  $J = 12.2, 9.0$  Hz, 1H), 3.63 (s, 3H), 3.18 (s, 3H), 3.13-3.04 (m, 1H), 1.75-1.70 (m, 3H), 1.58-1.36 (m, 6H), 1.05-1.00 (m, 2H).

$^{13}\text{C}$  NMR ( $\text{CDCl}_3$ , 125 MHz)  $\delta$  165.8, 144.4, 122.0, 79.4, 62.0, 41.0, 38.0, 37.4, 33.3, 32.1, 25.2.

IR (film) 2941, 2867, 2361, 2339, 1669, 1653, 1635, 1558  $\text{cm}^{-1}$ .  
LRMS (ES+) calcd for  $\text{C}_{13}\text{H}_{23}\text{N}_2\text{O}_4$  ( $\text{M}+\text{H}^+$ ) 271, found 271.

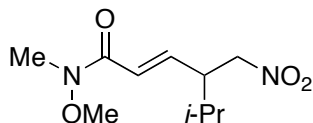

**(E)-N-Methoxy-N,5-dimethyl-4-(nitromethyl)hex-2-enamide (Table 2, entry 4).** The compound was prepared according to the general procedure (except 15% catalyst was used) with ( $\pm$ )-N-methoxy-N,5-dimethylhexa-2,3-dienamide (127 mg, 0.75 mmol). After purification by flash chromatography (30% EtOAc in hexanes), the title compound was isolated as a colorless oil (102 mg, 60% yield) with 81% ee.

$[\alpha]_{\text{D}}^{22} = -30$  ( $c = 1.0$ ,  $\text{CHCl}_3$ ). HPLC analysis of the product: Daicel CHIRALPAK OD-H column; 5.0% *i*-PrOH in hexanes; 1.0 mL/min; retention times: 19.7 min (major), 24.0 min (minor).

The second run was performed with (*R*)-1. The product was isolated as a colorless oil (108 mg, 63% yield) with 81% ee.

$^1\text{H}$  NMR ( $\text{CDCl}_3$ , 500 MHz)  $\delta$  6.72 (dd,  $J = 15.4, 9.5$  Hz, 1H), 6.44 (d,  $J = 15.4$  Hz, 1H), 4.49 (dd,  $J = 12.2, 5.1$  Hz, 1H), 4.35 (dd,  $J = 12.1, 9.8$  Hz, 1H), 3.63 (s, 3H), 3.19 (s, 3H), 2.91 (septet,  $J = 5.4$  Hz, 1H), 1.80 (sextet,  $J = 6.7$  Hz, 1H), 0.92 (dd,  $J = 13.0, 6.7$  Hz, 6H).

$^{13}\text{C}$  NMR ( $\text{CDCl}_3$ , 125 MHz)  $\delta$  165.6, 142.5, 122.8, 77.9, 62.0, 47.6, 32.4, 30.0, 20.5, 19.2.

IR (film) 2965, 2876, 2361, 2338, 1668, 1653, 1635, 1558, 1472, 1457  $\text{cm}^{-1}$ .

LRMS (ES+) calcd for  $\text{C}_{10}\text{H}_{19}\text{N}_2\text{O}_4$  ( $\text{M}+\text{H}^+$ ) 231, found 231.

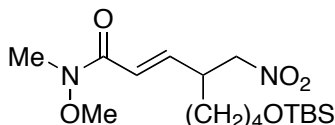

**(E)-8-(tert-Butyldimethylsilyloxy)-N-methoxy-N-methyl-4-(nitromethyl)oct-2-enamide (Table 2, entry 5).** The compound was prepared according to the general procedure with ( $\pm$ )-8-(tert-butyldimethylsilyloxy)-N-methoxy-N-methylocta-2,3-dienamide (235 mg, 0.75 mmol). After purification by flash chromatography (25% EtOAc in hexanes), the title compound was isolated as a colorless oil (156 mg, 56% yield) with 92% ee.

$[\alpha]_{\text{D}}^{22} = -19$  ( $c = 1.0$ ,  $\text{CHCl}_3$ ). HPLC analysis of the product: Daicel CHIRALPAK OD-H column; 5.0% *i*-PrOH in hexanes; 1.0 mL/min; retention times: 16.6 min (major), 18.4 min (minor).

The second run was performed with (*R*)-1. The product was isolated as a colorless oil (163 mg, 58% yield) with 92% ee.

$^1\text{H}$  NMR ( $\text{CDCl}_3$ , 500 MHz)  $\delta$  6.65 (dd,  $J = 15.4, 9.1$  Hz, 1H), 6.53 (d,  $J = 15.4$  Hz, 1H), 4.39 (dd,  $J = 12.3, 6.0$  Hz, 1H), 4.32 (dd,  $J = 12.3, 9.0$  Hz, 1H), 3.63 (s, 3H), 3.57-3.50 (m, 2H), 3.18 (s, 3H), 3.09-3.02 (m, 1H), 1.54-1.24 (m, 6H), 0.83 (s, 9H), -0.01 (s, 6H).

$^{13}\text{C}$  NMR ( $\text{CDCl}_3$ , 125 MHz)  $\delta$  165.6, 144.1, 122.1, 79.0, 62.9, 62.0, 41.6, 32.6, 31.4, 26.1, 23.3, 18.5, -5.1.

IR (film) 2933, 2858, 2361, 2339, 1668, 1653, 1635, 1557, 1380  $\text{cm}^{-1}$ .

LRMS (ES+) calcd for  $\text{C}_{17}\text{H}_{35}\text{N}_2\text{O}_5\text{Si}$  ( $\text{M}+\text{H}^+$ ) 375, found 375.

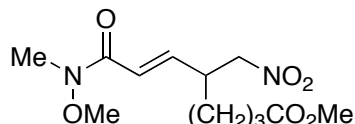

**(E)-Methyl 8-(methoxy(methyl)amino)-5-(nitromethyl)-8-oxooct-6-enoate (Table 2, entry 6).** The compound was prepared according to the general procedure with ( $\pm$ )-methyl 8-(methoxy(methyl)amino)-8-oxoocta-5,6-dienoate (170 mg, 0.75 mmol). After purification by flash chromatography (15  $\rightarrow$  50% EtOAc in hexanes), the title compound was isolated as a colorless oil (165 mg, 76% yield) with 94% ee.

$[\alpha]_{\text{D}}^{22} = -30$  ( $c = 1.0$ ,  $\text{CHCl}_3$ ). HPLC analysis of the product: Daicel CHIRALPAK AD-H column; 5.0% *i*-PrOH in hexanes; 1.0 mL/min; retention times: 59.9 min (major), 74.3 min (minor).

The second run was performed with (*R*)-1. The product was isolated as a colorless oil (158 mg, 73% yield) with 92% ee.

$^1\text{H}$  NMR ( $\text{CDCl}_3$ , 500 MHz)  $\delta$  6.61 (dd,  $J = 15.4, 9.1$  Hz, 1H), 6.47 (d,  $J = 15.5$  Hz, 1H), 4.39 (dd,  $J = 12.4, 6.0$  Hz, 1H), 4.31 (dd,  $J = 12.3, 8.8$  Hz, 1H), 3.61 (s, 3H), 3.58 (s, 3H), 3.16 (s, 3H), 3.08-3.00 (m, 1H), 2.25 (t,  $J = 6.9$  Hz, 2H), 1.64-1.41 (m, 4H).

$^{13}\text{C}$  NMR ( $\text{CDCl}_3$ , 125 MHz)  $\delta$  173.5, 165.6, 143.5, 122.5, 78.8, 62.0, 51.8, 41.3, 33.6, 32.4, 30.8, 22.2.

IR (film) 2952, 2871, 2361, 2338, 1734, 1664, 1635, 1557  $\text{cm}^{-1}$ .

LRMS (ES+) calcd for  $\text{C}_{12}\text{H}_{21}\text{N}_2\text{O}_6$  ( $\text{M}+\text{H}^+$ ) 289, found 289.

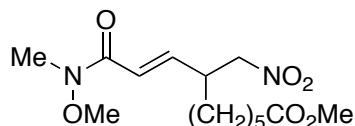

**(E)-Methyl 10-(methoxy(methyl)amino)-7-(nitromethyl)-10-oxodec-8-enoate (Table 2, entry 7).** The compound was prepared according to the general procedure with ( $\pm$ )-methyl 10-(methoxy(methyl)amino)-10-oxodeca-7,8-dienoate (191 mg, 0.75 mmol). After purification by flash chromatography (20  $\rightarrow$  50% EtOAc in hexanes), the title compound was isolated as a colorless oil (195 mg, 82% yield) with 92% ee.

$[\alpha]_D^{22} = -26$  ( $c = 1.0$ ,  $\text{CHCl}_3$ ). HPLC analysis of the product: Daicel CHIRALPAK OD-H column; 5.0% *i*-PrOH in hexanes; 1.0 mL/min; retention times: 56.7 min (major), 63.5 min (minor).

The second run was performed with (*R*)-**1**. The product was isolated as a colorless oil (193 mg, 82% yield) with 92% ee.

$^1\text{H}$  NMR ( $\text{CDCl}_3$ , 500 MHz)  $\delta$  6.58 (dd,  $J = 15.4, 9.1$  Hz, 1H), 6.40 (d,  $J = 15.4$  Hz, 1H), 4.35 (dd,  $J = 12.3, 5.9$  Hz, 1H), 4.28 (dd,  $J = 12.3, 8.7$  Hz, 1H), 3.58 (s, 3H), 3.55 (s, 3H), 3.13 (s, 3H), 3.02-2.94 (m, 1H), 2.19 (t,  $J = 7.4$  Hz, 3H), 1.52-1.16 (m, 7H).

$^{13}\text{C}$  NMR ( $\text{CDCl}_3$ , 125 MHz)  $\delta$  174.0, 165.7, 144.0, 122.1, 79.0, 61.9, 51.6, 41.4, 33.9, 32.3, 31.3, 28.9, 26.5, 24.7.

IR (film) 2938, 2861, 2361, 2339, 1734, 1558  $\text{cm}^{-1}$ .

LRMS (ES+) calcd for  $\text{C}_{14}\text{H}_{25}\text{N}_2\text{O}_6$  ( $\text{M}+\text{H}^+$ ) 317, found 317.

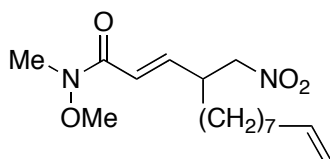

**(*E*)-*N*-Methoxy-*N*-methyl-4-(nitromethyl)trideca-2,12-dienamide (Table 2, entry 8).**

The compound was prepared according to the general procedure with ( $\pm$ )-*N*-methoxy-*N*-methyltrideca-2,3,12-trienamide (189 mg, 0.75 mmol). After purification by flash chromatography (5  $\rightarrow$  40% EtOAc in hexanes), the title compound was isolated as a colorless oil (199 mg, 85% yield) with 92% ee.

$[\alpha]_D^{22} = -26$  ( $c = 1.0$ ,  $\text{CHCl}_3$ ). HPLC analysis of the product: Daicel CHIRALPAK AD-H column; 5.0% *i*-PrOH in hexanes; 1.0 mL/min; retention times: 14.7 min (major), 18.0 min (minor).

The second run was performed with (*R*)-**1**. The product was isolated as a colorless oil (190 mg, 81% yield) with 92% ee.

$^1\text{H}$  NMR ( $\text{CDCl}_3$ , 500 MHz)  $\delta$  6.62 (dd,  $J = 15.4, 9.1$  Hz, 1H), 6.43 (d,  $J = 15.4$  Hz, 1H), 5.71 (ddt,  $J = 17.0, 10.2, 6.7$  Hz, 1H), 4.93-4.83 (m, 2H), 4.37 (dd,  $J = 12.3, 6.0$  Hz, 1H), 4.29 (dd,  $J = 12.1, 8.8$  Hz, 1H), 3.60 (s, 3H), 3.16 (s, 3H), 3.06-2.98 (m, 1H), 1.97-1.93 (m, 2H), 1.48-1.14 (m, 12H).

$^{13}\text{C}$  NMR ( $\text{CDCl}_3$ , 125 MHz)  $\delta$  165.7, 144.3, 139.2, 122.0, 114.4, 79.1, 61.9, 60.5, 41.5, 33.9, 31.6, 29.4, 29.1, 29.0, 26.8, 14.3.

IR (film) 3289, 3075, 2925, 2855, 2361, 2339, 1653  $\text{cm}^{-1}$ .

LRMS (ES+) calcd for  $\text{C}_{16}\text{H}_{29}\text{N}_2\text{O}_4$  ( $\text{M}+\text{H}^+$ ) 313, found 313.

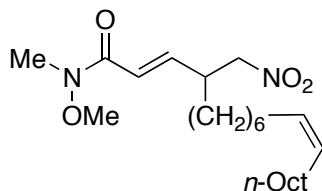

**(2E,11Z)-N-Methoxy-N-methyl-4-(nitromethyl)icosa-2,11-dienamide (Table 2, entry 9).** The compound was prepared according to the general procedure with (±)-(Z)-N-methoxy-N-methylnonadeca-2,3,10-trienamide (262 mg, 0.75 mmol). After purification by flash chromatography (7 → 14% EtOAc in hexanes), the title compound was isolated as a colorless oil (257 mg, 83% yield) with 93% ee.

$[\alpha]_D^{22} = -24$  ( $c = 1.0$ ,  $\text{CHCl}_3$ ). HPLC analysis of the product: Daicel CHIRALPAK OD-H column; 1.0% *i*-PrOH in hexanes; 1.0 mL/min; retention times: 57.4 min (major), 64.0 min (minor).

The second run was performed with (*R*)-**1**. The product was isolated as a colorless oil (260 mg, 84% yield) with 93% ee.

$^1\text{H}$  NMR ( $\text{CDCl}_3$ , 500 MHz)  $\delta$  6.64 (dd,  $J = 15.4, 9.4$  Hz, 1H), 6.47 (dd,  $J = 15.4$  Hz, 1H), 5.31-5.20 (m, 2H), 4.38 (dd,  $J = 12.3, 6.0$  Hz, 1H), 4.30 (dd,  $J = 12.1, 8.9$  Hz, 1H), 3.61 (s, 3H), 3.17 (s, 3H), 3.08-2.98 (m, 1H), 2.00-1.88 (m, 4H), 1.48-1.10 (m, 22H), 0.81 (t,  $J = 6.5$  Hz, 3H).

$^{13}\text{C}$  NMR ( $\text{CDCl}_3$ , 125 MHz)  $\delta$  165.8, 144.3, 130.2, 129.7, 122.0, 79.1, 61.9, 41.5, 36.8, 32.4, 32.0, 31.6, 29.9, 29.8, 29.7, 29.5, 29.4, 29.2, 27.4, 27.3, 26.9, 22.9, 14.3.

IR (film) 3003, 2926, 2855, 2361, 2339, 1667, 1635, 1557, 1464  $\text{cm}^{-1}$ .

LRMS (ES+) calcd for  $\text{C}_{23}\text{H}_{43}\text{N}_2\text{O}_4$  ( $\text{M}+\text{H}^+$ ) 411, found 411.

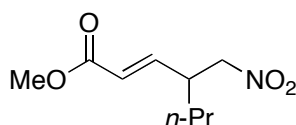

**(E)-Methyl 4-(nitromethyl)hept-2-enoate (Table 3, entry 1).** The compound was prepared according to the general procedure with (±)-methyl hepta-2,3-dienoate (105 mg, 0.75 mmol). After purification by flash chromatography (30% hexanes in  $\text{CH}_2\text{Cl}_2$ ), the title compound was isolated as a colorless oil (109 mg, 72% yield) with 92% ee.

$[\alpha]_D^{22} = -32$  ( $c = 1.0$ ,  $\text{CHCl}_3$ ). HPLC analysis of the product: Daicel CHIRALPAK OD-H column; 1.0% *i*-PrOH in hexanes; 1.0 mL/min; retention times: 24.8 min (minor), 32.7 min (major).

The second run was performed with (*R*)-**1**. The product was isolated as a colorless oil (113 mg, 74% yield) with 93% ee.

$^1\text{H}$  NMR ( $\text{CDCl}_3$ , 500 MHz)  $\delta$  6.72 (dd,  $J = 15.6, 9.1$  Hz, 1H), 5.90 (d,  $J = 15.7$  Hz, 1H), 4.42 (dd,  $J = 12.3, 5.9$  Hz, 1H), 3.85 (dd,  $J = 12.3, 8.7$  Hz, 1H), 3.73 (s, 3H), 3.10-3.03 (m, 1H), 1.50-1.25 (m, 4H), 0.91 (t,  $J = 7.3$  Hz, 3H).

$^{13}\text{C}$  NMR ( $\text{CDCl}_3$ , 125 MHz)  $\delta$  166.3, 146.1, 124.2, 78.9, 52.0, 41.0, 33.5, 20.0, 13.9.  
 IR (film) 2960, 2935, 2875, 2361, 2339, 1717, 1661, 1558, 1436  $\text{cm}^{-1}$ .  
 LRMS (ES+) calcd for  $\text{C}_9\text{H}_{16}\text{NO}_4$  ( $\text{M}+\text{H}^+$ ) 202, found 202.

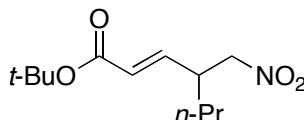

**(E)-tert-Butyl 4-(nitromethyl)hept-2-enoate (Table 3, entry 2).** The compound was prepared according to the general procedure with ( $\pm$ )-tert-butyl hepta-2,3-dienoate (137 mg, 0.75 mmol). After purification by flash chromatography (10% EtOAc in hexanes), the title compound was isolated as a colorless oil (173 mg, 95% yield) with 90% ee.

$[\alpha]_{\text{D}}^{22} = -29$  ( $c = 1.0$ ,  $\text{CHCl}_3$ ). HPLC analysis of the product: Daicel CHIRALPAK OD-H column; 1.0% *i*-PrOH in hexanes; 1.0 mL/min; retention times: 13.6 min (minor), 17.4 min (major).

The second run was performed with (*R*)-1. The product was isolated as a colorless oil (168 mg, 93% yield) with 90% ee.

$^1\text{H}$  NMR ( $\text{CDCl}_3$ , 500 MHz)  $\delta$  6.56 (dd,  $J = 15.6, 9.0$  Hz, 1H), 5.77 (d,  $J = 15.6$  Hz, 1H), 4.37 (dd,  $J = 12.3, 6.1$  Hz, 1H), 4.31 (dd,  $J = 12.3, 8.5$  Hz, 1H), 3.04-2.96 (m, 1H), 1.42-1.20 (m, 13H), 0.86 (t,  $J = 6.6$  Hz, 3H).

$^{13}\text{C}$  NMR ( $\text{CDCl}_3$ , 125 MHz)  $\delta$  165.1, 144.6, 126.1, 80.9, 78.9, 40.8, 33.5, 28.2, 20.0, 13.9.  
 IR (film) 2964, 2934, 2875, 2361, 2339, 1713, 1654, 1554, 1368, 1159  $\text{cm}^{-1}$ .  
 LRMS (ES+) calcd for  $\text{C}_8\text{H}_{12}\text{NO}_4$  ( $\text{M}-t\text{-Bu}^+$ ) 186, found 186.

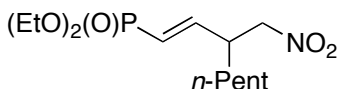

**(E)-Diethyl 3-(nitromethyl)oct-1-enylphosphonate (Table 3, entry 3).** The compound was prepared according to the general procedure (except 3.0 equiv of phenol was used and the reaction mixture was heated at 60 °C) with ( $\pm$ )-diethyl octa-1,2-dienylphosphonate (185 mg, 0.75 mmol). After purification by flash chromatography (70% EtOAc in hexanes), the title compound was isolated as a colorless oil (203 mg, 89% yield) with 75% ee.

$[\alpha]_{\text{D}}^{22} = -18$  ( $c = 1.0$ ,  $\text{CHCl}_3$ ). HPLC analysis of the product: Daicel CHIRALPAK OD-H column; 2.0% *i*-PrOH in hexanes; 1.0 mL/min; retention times: 41.4 min (minor), 46.7 min (major).

The second run was performed with (*R*)-1. The product was isolated as a colorless oil (193 mg, 84% yield) with 72% ee.

$^1\text{H}$  NMR ( $\text{CDCl}_3$ , 500 MHz)  $\delta$  6.45 (ddd,  $J = 21.6, 17.1, 8.7$  Hz, 1H), 5.64 (dd,  $J = 18.9, 17.1$  Hz, 1H), 4.35 (dd,  $J = 12.2, 5.6$  Hz, 1H), 4.26 (dd,  $J = 12.2, 9.0$  Hz, 1H), 4.01-3.87 (m, 4H), 2.96-2.89 (m, 1H), 1.42-1.30 (m, 2H), 1.28-1.11 (m, 12H), 0.77 (t,  $J = 6.6$  Hz, 3H).

$^{13}\text{C}$  NMR ( $\text{CDCl}_3$ , 125 MHz)  $\delta$  150.6, 121.7, 78.8, 62.0, 43.2, 43.0, 31.5, 31.1, 26.4, 22.5, 16.5, 16.4, 14.0.

IR (film) 2958, 2932, 2860, 2361, 2339, 1639, 1553, 1380, 1246  $\text{cm}^{-1}$ .

LRMS (ES+) calcd for  $\text{C}_{13}\text{H}_{27}\text{NO}_5\text{P}$  ( $\text{M}+\text{H}^+$ ) 308, found 308.

### III. Determination of Absolute Stereochemistry

The stereochemistry of two of the  $\gamma$ -addition products was assigned by correlation with known compounds. The stereochemistry of the other products was assigned by analogy.

(*S*)-3-methyl-2-(nitromethyl)butanal:<sup>3</sup>

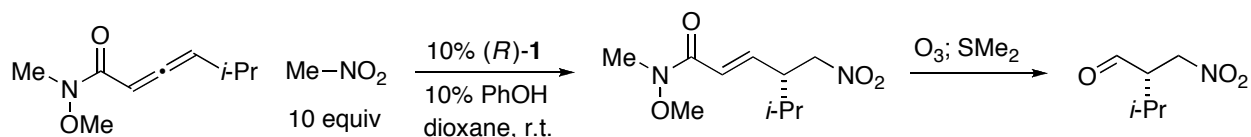

(*R*)-*tert*-butyl 2-(hydroxymethyl)pentylcarbamate:<sup>4</sup>

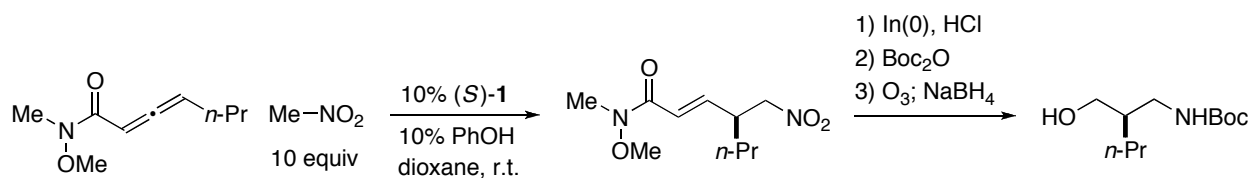

(3) Enders, D.; Syrig, R.; Raabe, G.; Fernández, R.; Gasch, C.; Lassaletta, J.-M.; Llera, J.-M. *Synthesis* **1996**, 48–52.

(4) Chi, Y.; Gellman, S. H. *J. Am. Chem. Soc.* **2006**, 128, 6804–6805.

# STANDARD PROTON PARAMETERS

exp1 s2pul

|                    |                |           |          |
|--------------------|----------------|-----------|----------|
| SAMPLE             |                | DEC. 4 VT |          |
| date               | Feb 15 2006    | dfreq     | 125.672  |
| solvent            | CDC13          | dn        | C13      |
| file               | /data/export/~ | dpvr      | 30       |
| home/gtu/tsm/bu11w | dmf            | dof       | 0        |
| inle/tsm-13-007-11 | dm             | nnn       | v        |
| ACQUISITION        | dfid           | dm        | 10000    |
| sfrq               | 483.746        | dseq      | 1.0      |
| tn                 | HI             | dres      | n        |
| at                 | 3.001          | homo      | n        |
| np                 | 63050          | wtfile    | ft       |
| sw                 | 10504.2        | proc      | 262144   |
| td                 | not used       | fn        | math     |
| lpwr               | 56             | fn        | math     |
| pw                 | 8.6            | war       | 2.000    |
| dt                 | 2.000          | wexp      | 1519.5   |
| tof                | 1519.5         | wbs       | 16       |
| nt                 | 16             | wnt       | 8        |
| ct                 | 8              | gain      | not used |
| alock              | n              | flags     | n        |
| gain               | not used       | 11        | n        |
| 11                 | n              | 1n        | n        |
| 1n                 | n              | dp        | y        |
| dp                 | y              | hs        | nm       |
| hs                 | nm             | DISPLAY   | 0.3      |
| SP                 | 0.3            | VP        | 3994.4   |
| VS                 | 3994.4         | VS        | 72       |
| SC                 | 72             | WC        | 250      |
| WC                 | 250            | Hznm      | 15.96    |
| Hznm               | 15.96          | IS        | 33.57    |
| IS                 | 33.57          | FT1       | 1233.8   |
| FT1                | 1233.8         | TH        | 0        |
| TH                 | 0              | INS       | 7        |
| INS                | 7              | AL        | 1.000    |
| AL                 | 1.000          | cdc       | ph       |

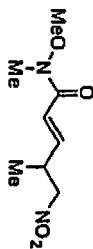

Table 2, entry 1

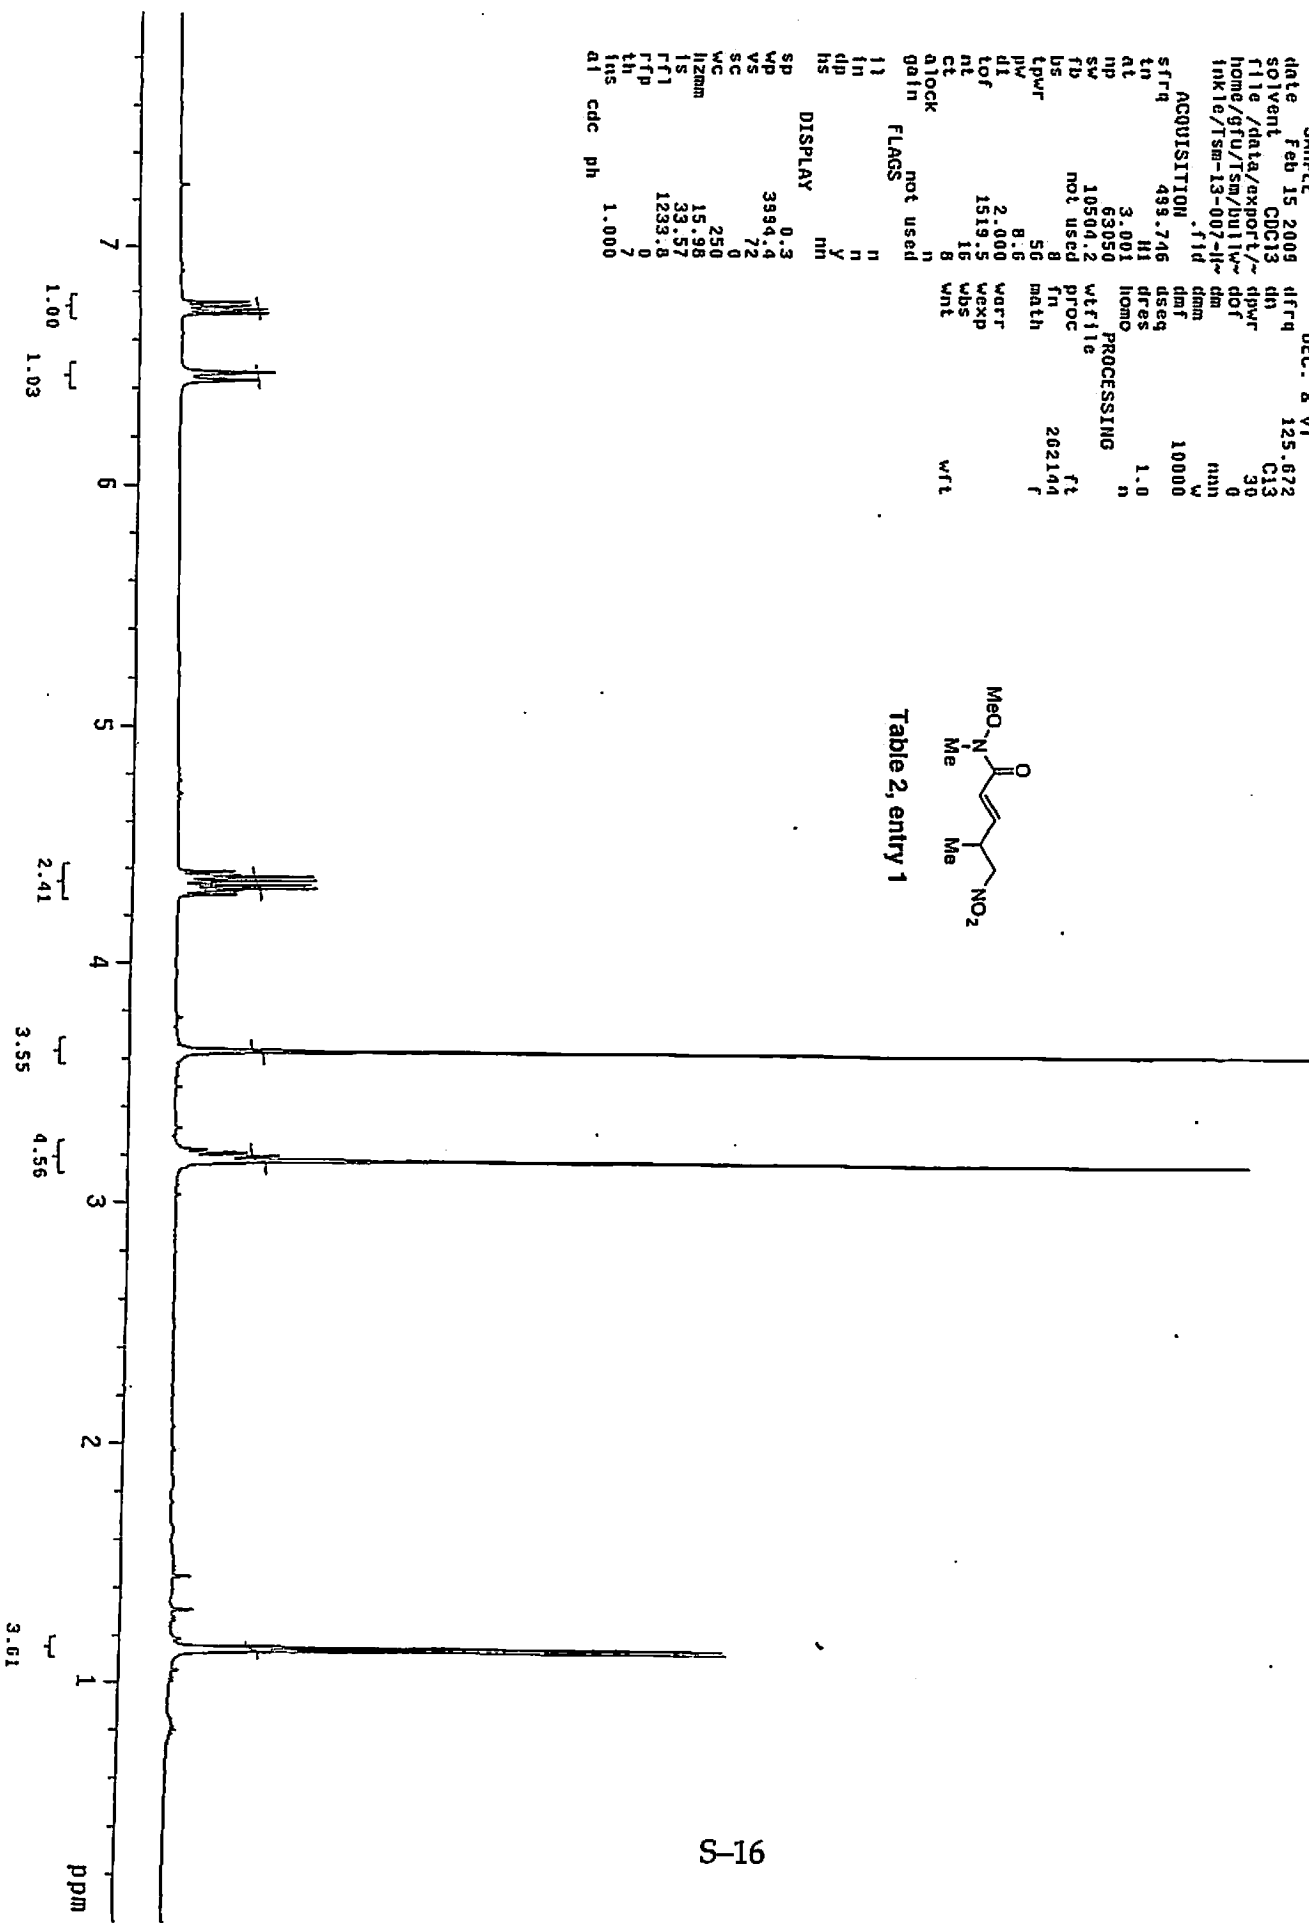

## exp1 szpu1

| SAMPLE              |                 |         |         | DEC. & VI  |  |  |  |
|---------------------|-----------------|---------|---------|------------|--|--|--|
| date                | Feb 15 2009     | CHC13   | 125.672 |            |  |  |  |
| solvent             | CDC13           | th      | 125.672 |            |  |  |  |
| file                | /data/export/1~ | dpwr    | 30      |            |  |  |  |
| home/gfu/tsm/bu1/v- | do              | dm      | mm      |            |  |  |  |
| lnkte/tsm-13-005-t- | fid             | dmm     | w       |            |  |  |  |
| ACQUISITION         |                 |         |         | PROCESSING |  |  |  |
| sfrq                | 499.746         | dmf     | 10000   |            |  |  |  |
| tu                  | H1              | dres    | 1.0     |            |  |  |  |
| at                  | 3.001           | homo    | n       |            |  |  |  |
| nm                  | 80850           | wf1file |         |            |  |  |  |
| sw                  | 10504.2         | proc    | 262144  |            |  |  |  |
| fd                  | not used        | fn      |         |            |  |  |  |
| bs                  | 8               | math    |         |            |  |  |  |
| tpwr                | 56              | wert    |         |            |  |  |  |
| pw                  | 8.6             | wexp    |         |            |  |  |  |
| dl                  | 2.000           | wds     |         |            |  |  |  |
| tof                 | 1519.5          | wnt     |         |            |  |  |  |
| nt                  | 16              |         |         |            |  |  |  |
| cl                  | 8               |         |         |            |  |  |  |
| alock               | n               |         |         |            |  |  |  |
| galn                | not used        |         |         |            |  |  |  |
| FLAGS               |                 |         |         | wft        |  |  |  |
| l1                  | n               |         |         |            |  |  |  |
| l2                  | n               |         |         |            |  |  |  |
| dp                  | y               |         |         |            |  |  |  |
| hs                  | nh              |         |         |            |  |  |  |
| DISPLAY             |                 |         |         |            |  |  |  |
| sp                  | 0.3             |         |         |            |  |  |  |
| wp                  | 3994.4          |         |         |            |  |  |  |
| vs                  | 67              |         |         |            |  |  |  |
| sc                  | 0               |         |         |            |  |  |  |
| wc                  | 250             |         |         |            |  |  |  |
| hzmm                | 15.98           |         |         |            |  |  |  |
| ls                  | 33.57           |         |         |            |  |  |  |
| rffp                | 1233.8          |         |         |            |  |  |  |
| th                  | 0               |         |         |            |  |  |  |
| tl                  | 7               |         |         |            |  |  |  |
| ph                  | 1.000           |         |         |            |  |  |  |

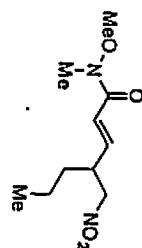

Table 2, entry 2

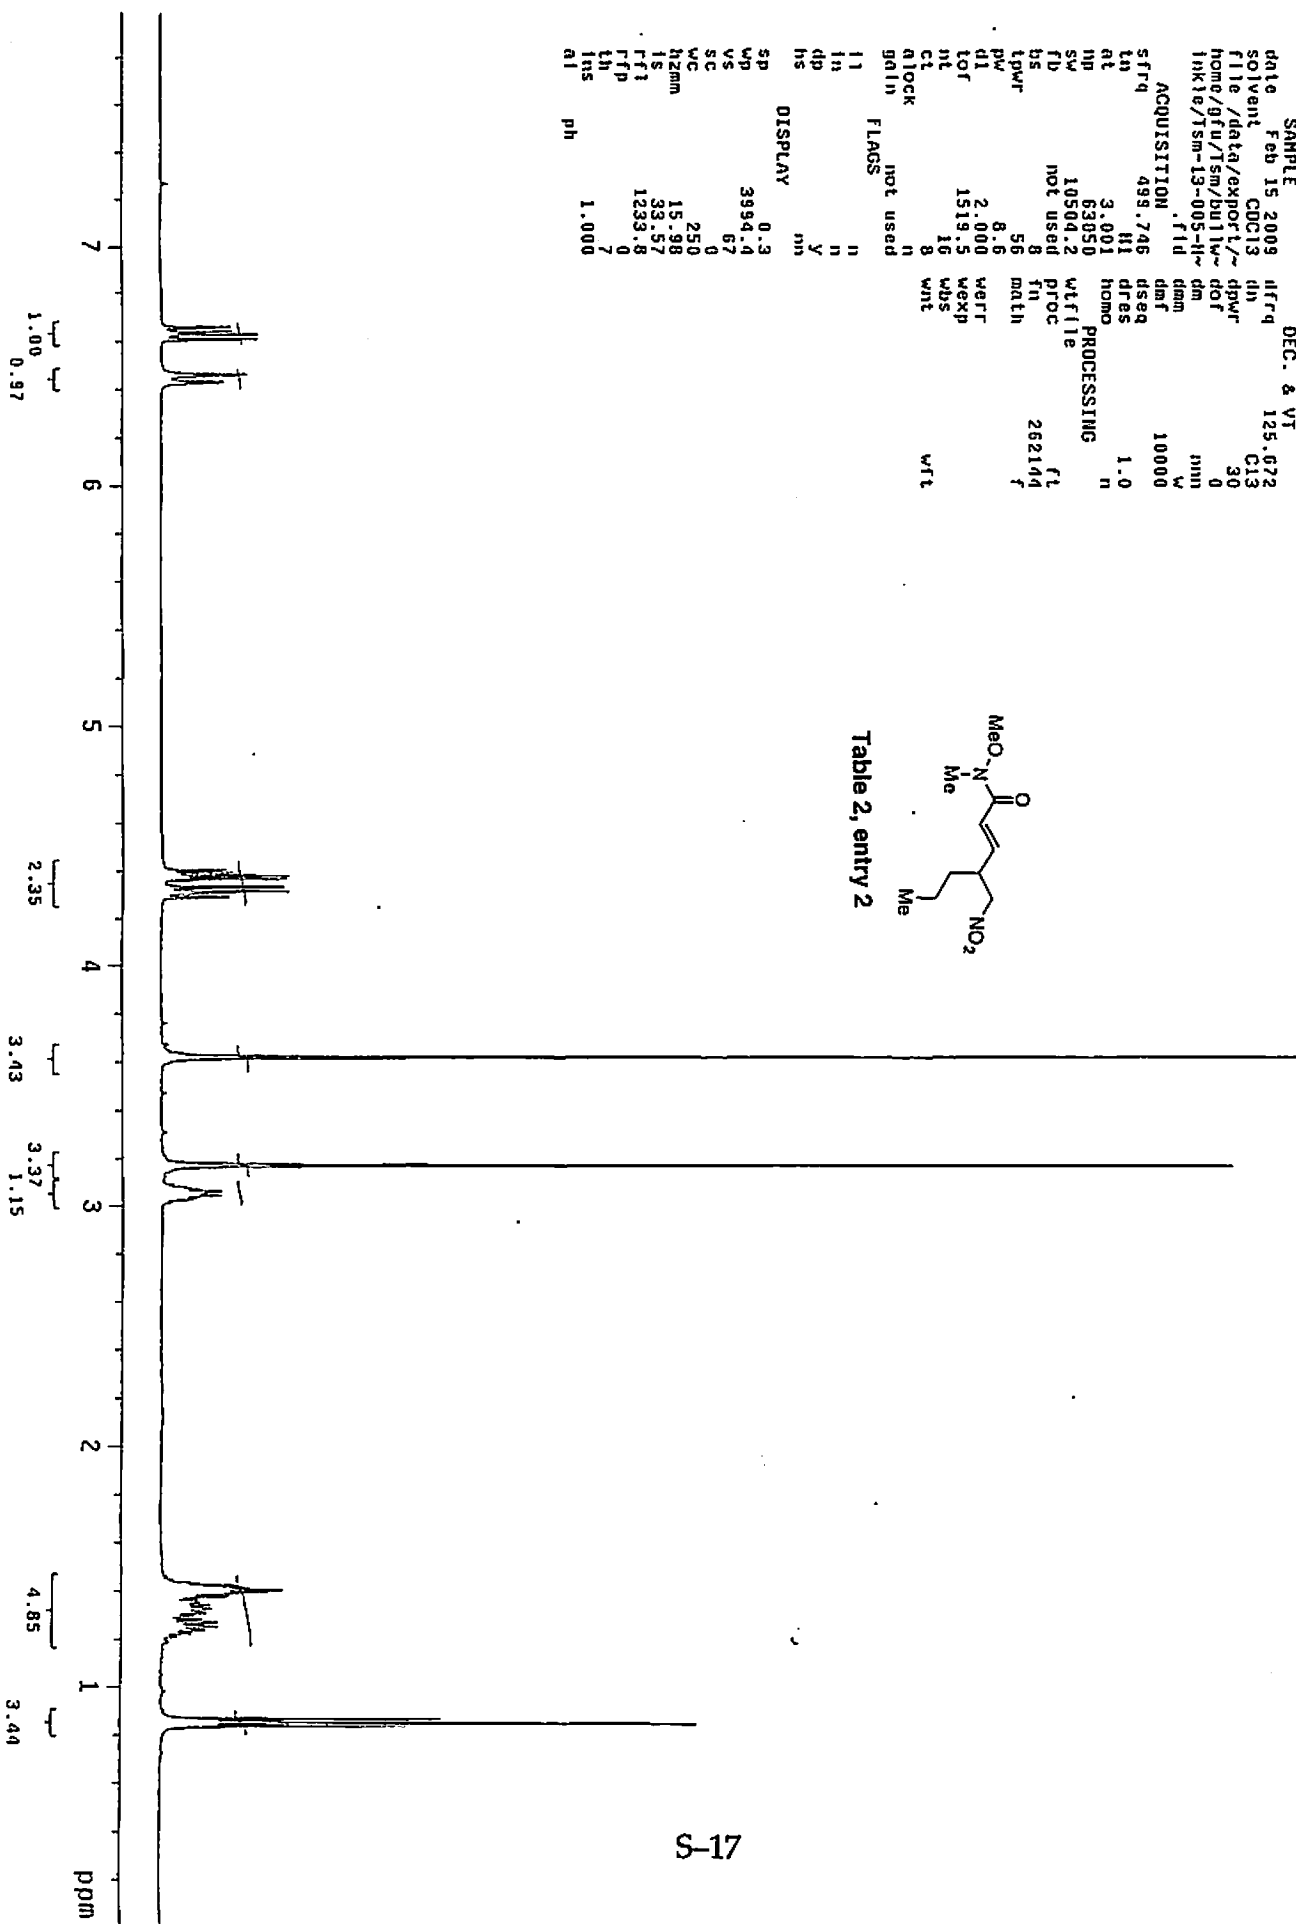

# STANDARD PROTON PARAMETERS

expl s2pu1

SAMPLE DEC. 8 VT  
 date Feb 15 2009 dfrq 125.672  
 solvent CDCl3 dn C13  
 file /data/export/~ dprw 30  
 home/gtu/tsm/bu114~ dof 0  
 Inkie/Tsm-13-008-H~ um mm  
 .fid umm v  
 ACQUISITION 10000  
 sfrq 499.746 dscq  
 tn M1 dres 1.0  
 at 3.001 homo  
 mp 63050 wfile  
 sw 10504.2 proc fl  
 tb not used 262144  
 tpwr 8.6 math f  
 pw 2.000 wefr  
 dl 1519.5 wexp  
 tof 15 WDS  
 nt 18 wnt  
 ct 8  
 alock n  
 gain not used  
 flags  
 l1 n  
 ln n  
 dp y  
 hs nm  
 DISPLAY  
 sp 0.3  
 wp 3994.4  
 vs 68  
 sc 0  
 wc 250  
 hzmm 15.36  
 fe 33.57  
 rfi 1233.8  
 rfp 0  
 th 7  
 ins 1.000  
 al ph

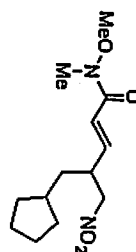

Table 2, entry 3

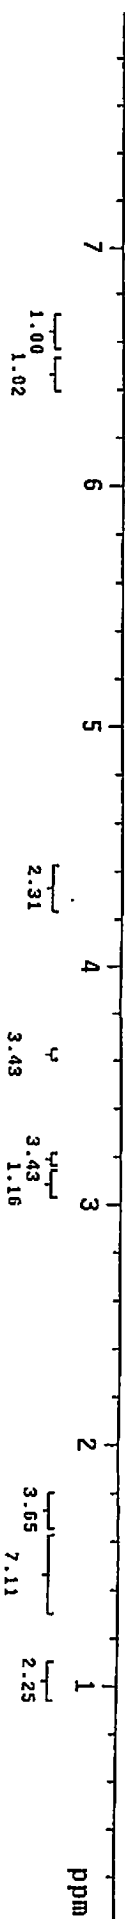

# STANDARD PROTON PARAMETERS

expi szpu1

SAMPLE DEC. 8 VT  
 date Feb 15 2009 dfrq 125.672  
 solvent CDCl3 dn C13  
 file /data/export/~ dpwr 30  
 home/gfu/Tsm/bu1lw~ dof 0  
 inkle/Tsm-13-014-H~ dm nm  
 ACQUISITION .fid dnm v  
 sfrq 499.746 dres 10000  
 tn H1 dres 1.0  
 at 3.001 homo n  
 np 63050 PROCESSING  
 sw 10504.2 wfile ft  
 fb not used proc 262144  
 bs 8 fn math f  
 tpwr 56  
 pw 8.6  
 dl 2.000 werr  
 tof 1519.5 wexp  
 nt 16 wbs  
 ct 0 wnt  
 alock n  
 gain not used wft  
 flags  
 f1 n  
 in n  
 dp y  
 hs nm  
 DISPLAY  
 sp -0.8  
 wp 4000.2  
 vs 40  
 sc 0  
 wc 250  
 hzmm 16.00  
 is 33.57  
 rfp 1233.8  
 th 0  
 ins 7  
 al 1.000  
 ph

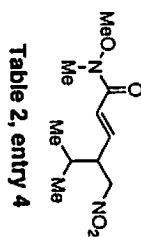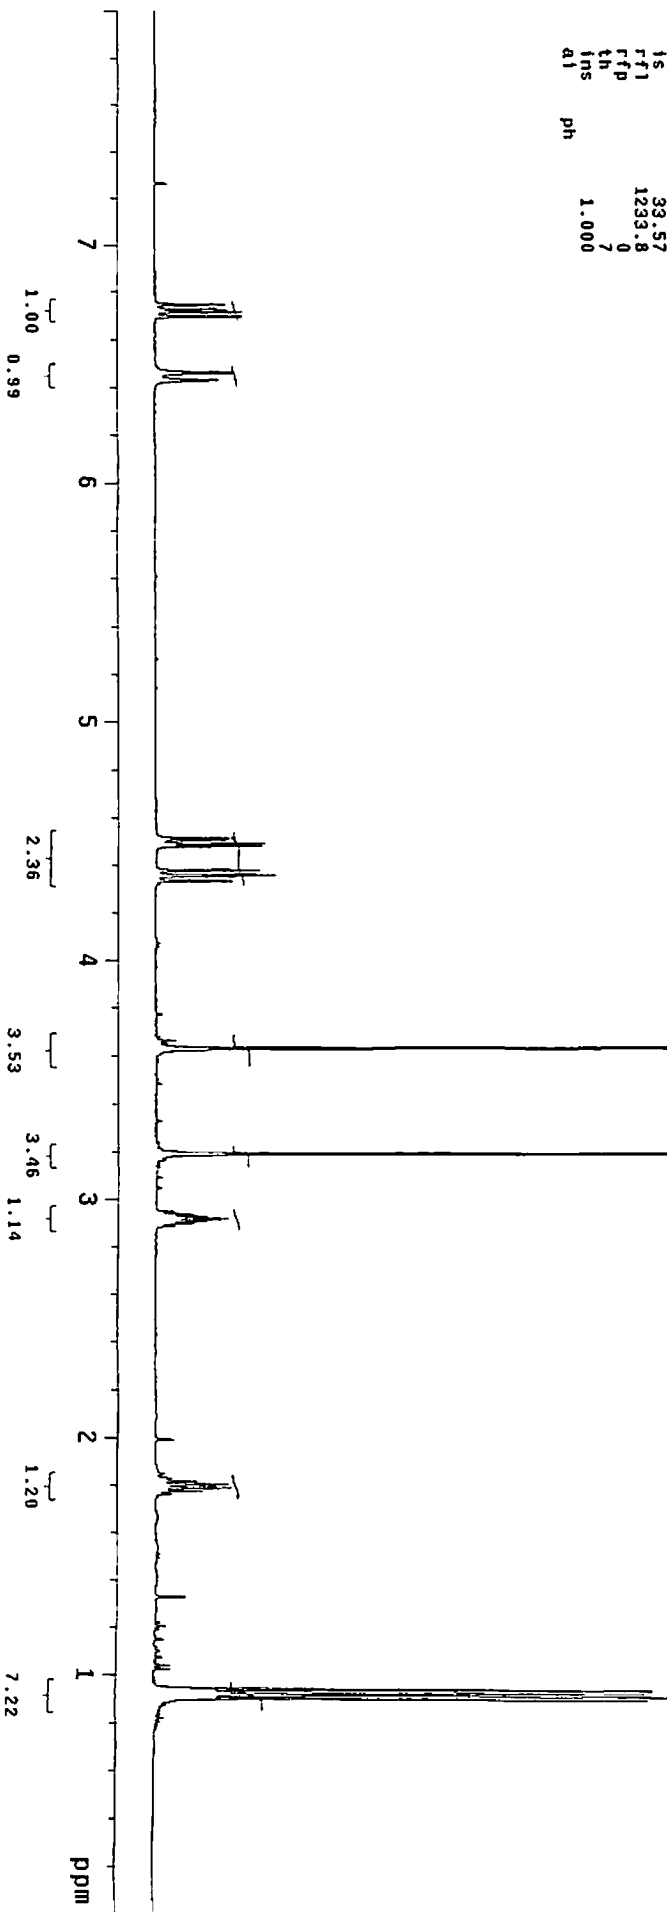

# STANDARD PROTON PARAMETERS

expt s2pu1

|                     |                |            |         |
|---------------------|----------------|------------|---------|
| SAMPLE              |                | DEC. & VT  |         |
| date                | Feb 24 2009    | dfrq       | 125.672 |
| solvent             | CDCl3          | dn         | C13     |
| file                | /data/export/~ | dpwr       | 30      |
| home/gfu/Tsm/bu114  | dm             | dot        | 0       |
| linkle/Tsm-13-044-1 | dm             | nmn        | nmn     |
| RI.f11d             | dm             | w          | w       |
| ACQUISITION         |                | 10000      |         |
| sfrq                | 499.746        | dmt        | dmf     |
| in                  | H1             | dres       | 1.0     |
| at                  | 3.001          | homo       | n       |
| mp                  | 63050          | temp       | 20.0    |
| sw                  | 10504.2        | PROCESSING |         |
| ftb                 | not used       | wtfile     | ft      |
| bs                  | 8              | proc       | 56      |
| tpwr                | 8.6            | fn         | 262144  |
| pv                  | 2.000          | math       | f       |
| d1                  | 1519.5         | werf       | 16      |
| nt                  | 16             | wexp       | 8       |
| ct                  | 8              | wbs        | 8       |
| atlock              | n              | wit        | wit     |
| gain                | not used       |            |         |
| FLAGS               |                |            |         |
| 11                  | n              |            |         |
| in                  | n              |            |         |
| dp                  | y              |            |         |
| hs                  | nm             |            |         |
| DISPLAY             |                |            |         |
| sp                  | -197.3         |            |         |
| wp                  | 4192.3         |            |         |
| vs                  | 37             |            |         |
| sc                  | 0              |            |         |
| wc                  | 250            |            |         |
| h2mm                | 16.77          |            |         |
| is                  | 33.57          |            |         |
| rfl                 | 1233.8         |            |         |
| rflp                | 0              |            |         |
| tlh                 | 7              |            |         |
| lms                 | 1.000          |            |         |
| at                  | ph             |            |         |

Table 2, entry 5

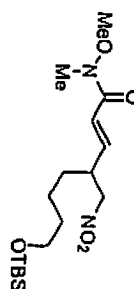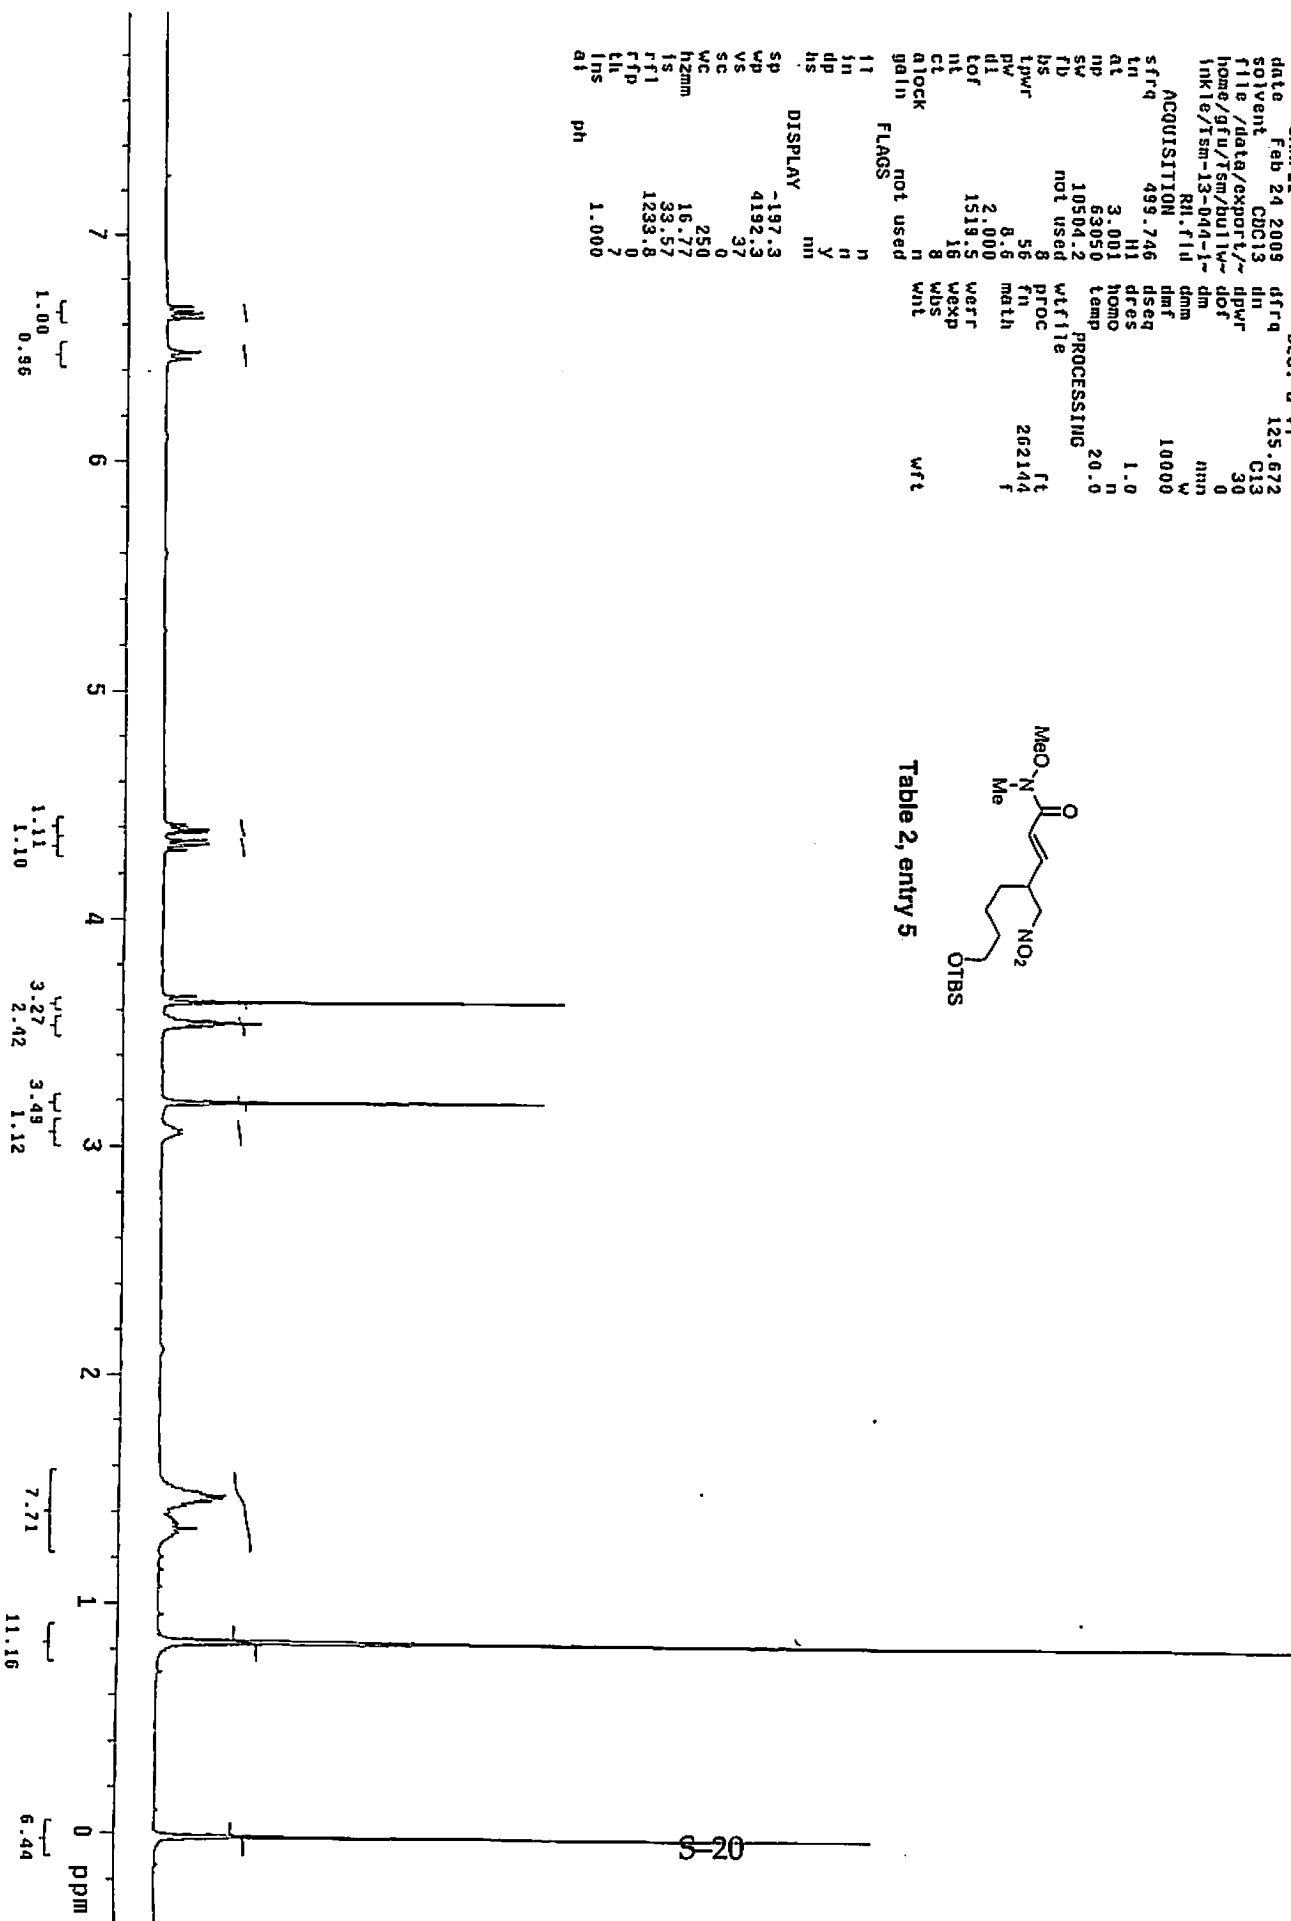

# STANDARD PROTON PARAMETERS

exp1 s2pu1

SAMPLE DEC. 4 VT  
 date Feb 15 2009 dfrq 125.672  
 solvent CDCl3 dn C13  
 file /data/export/~ dpr 30  
 home/gu/1sm/bu1w~ dof 0  
 lnk le/1sm-13-012-11~  
 .fid  
 ACQUISITION  
 sfrq 499.746 dmf 10000  
 tn 499.746 useq 1.0  
 at 3.001 homo n  
 ap 63050 wffile f  
 sv 10304.2 proc 262144  
 fd not used f  
 bs 8 fn math  
 lpr 56  
 pw 8.6 wert  
 d1 2.000 wexp  
 tof 1519.5 lbs  
 nl 16  
 ct 0  
 alock n  
 gain not used  
 flags  
 11 n  
 in n  
 dp y  
 bs m  
 DISPLAY  
 sp -0.8  
 wp 4000.2  
 vs 87  
 sc 0  
 wc 250  
 h2mm 16.00  
 ls 33.57  
 rfi 1233.8  
 rfp 0  
 lh 7  
 lns 1.000  
 al ph

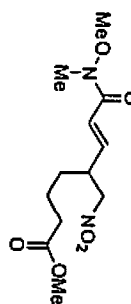

Table 2, entry 6

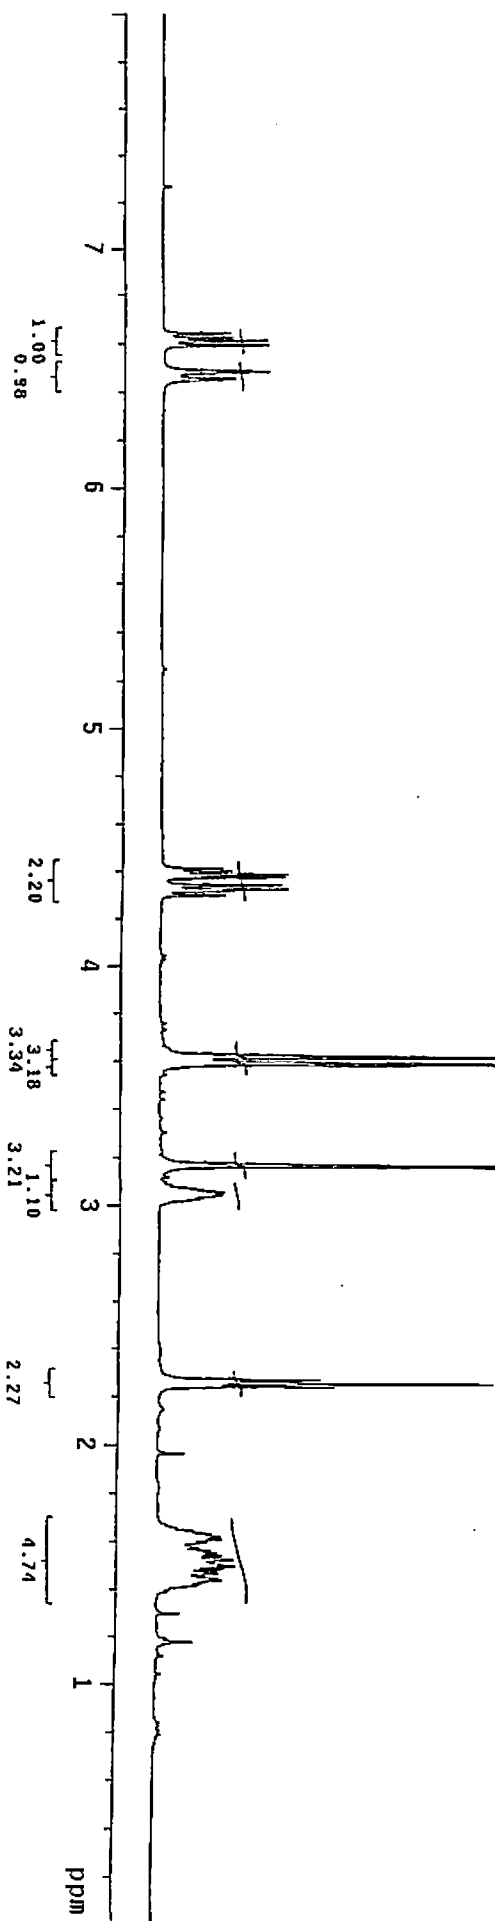

## STANDARD PROTON PARAMETERS

expl s2pu1

|                    |               |            |             |           |
|--------------------|---------------|------------|-------------|-----------|
| SAMPLE             |               | date       | feb 23 2009 | DEC. A VT |
| solvent            | CDC13         | dh         | 125.672     | C13       |
| file               | /data/gfr/Tsm | dpwr       | 30          |           |
| /Tsm-13-030-14.fid |               | hof        | 0           |           |
| ACQUISITION        |               | dm         | nmh         |           |
| sfrq               | 499.746       | dmm        | 10000       | v         |
| ln                 | 11            | daf        |             |           |
| at                 | 3.001         | dscn       |             |           |
| nd                 | 83050         | dres       | 1.0         |           |
| sw                 | 10504.2       | homo       | 20.0        |           |
| fu                 | not used      | temp       |             |           |
| bs                 | 8             | DEC2       | 0           |           |
| tpwr               | 56            | dfrq2      |             |           |
| pw                 | 8.6           | dn2        |             |           |
| dl                 | 2.000         | dpwr2      | 1           |           |
| tof                | 1519.5        | dof2       | 0           |           |
| nt                 | 16            | dm2        | n           |           |
| ct                 | 8             | dmm2       | c           |           |
| clock              | n             | dmt2       | 200         |           |
| geln               | not used      | dseq2      |             |           |
| 11                 | n             | dres2      | 1.0         |           |
| in                 | n             | homo2      | n           |           |
| dp                 | y             | dfrq3      | DEC3        | 0         |
| hs                 | nm            | dn3        |             |           |
| DISPLAY            |               | dpwr3      | 1           |           |
| sp                 | 4.4           | dot3       | 0           |           |
| wp                 | 3993.2        | dms3       | n           |           |
| vs                 | 34            | dmm3       | c           |           |
| sc                 | 0             | dms3       | 200         |           |
| wc                 | 250           | dseq3      |             |           |
| h2mm               | 15.97         | dres3      | 1.0         |           |
| is                 | 33.57         | homo3      | n           |           |
| rff                | 1233.8        | PROCESsing |             |           |
| th                 | 0             | wf11e      |             |           |
| ins                | 7             | proc       | ft          |           |
| at                 | 1.000         | fn         | 262144      |           |
| cds                | ph            | math       | f           |           |
|                    |               | werr       |             |           |
|                    |               | wexp       |             |           |
|                    |               | wbs        |             |           |
|                    |               | wnt        | wfl         |           |

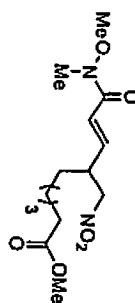

Table 2, entry 7

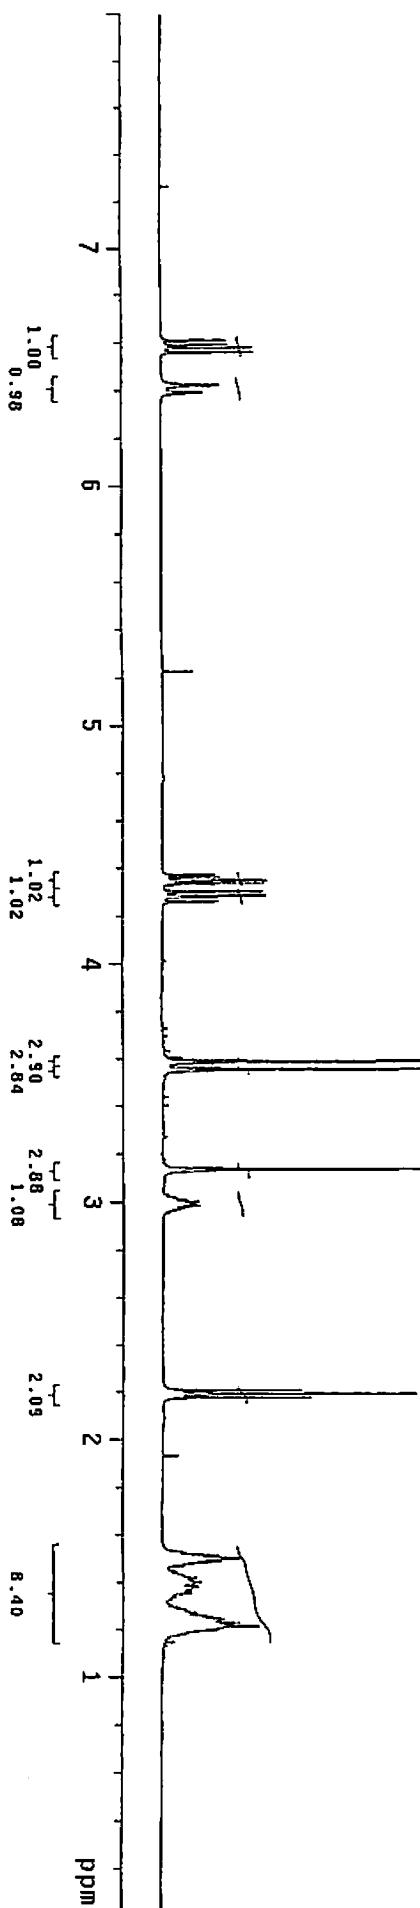

# STANDARD PROTON PARAMETERS

expl s2put

SAMPLE DEC. & VT  
 date Feb 15 2009 dfrq 125.672  
 solvent CDC13 dn C13  
 file /data/export/~ dpwr 30  
 home/gfu/Tsm/bu1w~ dof 0  
 inke/Tsm-13-010-H~ dm mm  
 .fid dm w  
 ACQUISITION  
 sfrq 499.746 dmf 10000  
 tn h1 dres 1.0  
 at 3.001 homo n  
 np 63050  
 sw 10504.2 wfile fl  
 fb not used proc 262144 f  
 bs 8 fn math  
 tpwr 8.6  
 pw 2.000 weft  
 dl 1519.5 wecp  
 nt 16 wbs  
 ct 0 wnt  
 atock n  
 gain not used  
 11 FLAGS n  
 in n  
 dp y  
 hs mn  
 DISPLAY  
 sp -0.8  
 wp 4000.2  
 vs 55  
 sc 0  
 wc 250  
 hznm 16.00  
 is 33.57  
 rfi 1233.8  
 rfp 0  
 th 7  
 ins 1.000  
 al cdc ph

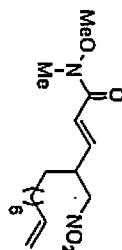

Table 2, entry 8

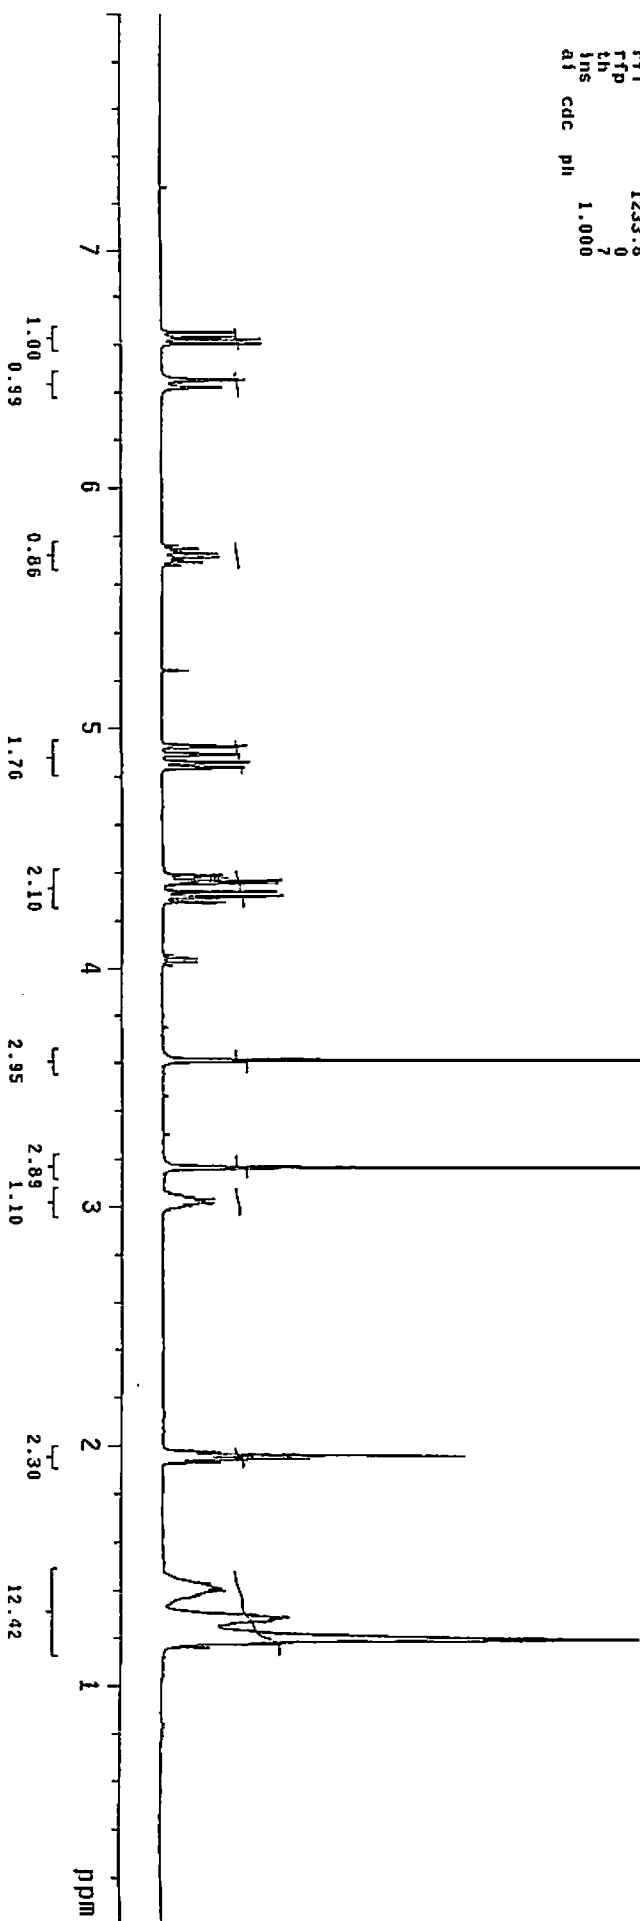

# STANDARD PROTON PARAMETERS

exp1 s2pu1

SAMPLE DEC. 4 VT  
 date feb 15 2009 dfreq 125.672  
 solvent CDC13 dn C13  
 file /data/export/~ dpwr 30  
 home/glu/tsm/bu11w dof 0  
 lnk1e/tsm-13-009-H- dm nm  
 .fid  
 ACQUISITION  
 sfreq 498.746 dmf 10000  
 tn H1 dseg 1.0  
 at 3.001 homo  
 mp 63050 wffile  
 sw 10504.2 wffile  
 fb not used proc ft  
 bs 8 fn 262144  
 tpwr 56 math f  
 pw 8.6 werr  
 d1 2.000 wexp  
 tot 1519.5 wbs  
 nt 16 wnt  
 ct 0  
 alock not used  
 gain not used  
 flags  
 l1 n  
 l2 n  
 l3 n  
 l4 n  
 l5 n  
 l6 n  
 l7 n  
 l8 n  
 l9 n  
 l10 n  
 l11 n  
 l12 n  
 l13 n  
 l14 n  
 l15 n  
 l16 n  
 l17 n  
 l18 n  
 l19 n  
 l20 n  
 l21 n  
 l22 n  
 l23 n  
 l24 n  
 l25 n  
 l26 n  
 l27 n  
 l28 n  
 l29 n  
 l30 n  
 l31 n  
 l32 n  
 l33 n  
 l34 n  
 l35 n  
 l36 n  
 l37 n  
 l38 n  
 l39 n  
 l40 n  
 l41 n  
 l42 n  
 l43 n  
 l44 n  
 l45 n  
 l46 n  
 l47 n  
 l48 n  
 l49 n  
 l50 n  
 l51 n  
 l52 n  
 l53 n  
 l54 n  
 l55 n  
 l56 n  
 l57 n  
 l58 n  
 l59 n  
 l60 n  
 l61 n  
 l62 n  
 l63 n  
 l64 n  
 l65 n  
 l66 n  
 l67 n  
 l68 n  
 l69 n  
 l70 n  
 l71 n  
 l72 n  
 l73 n  
 l74 n  
 l75 n  
 l76 n  
 l77 n  
 l78 n  
 l79 n  
 l80 n  
 l81 n  
 l82 n  
 l83 n  
 l84 n  
 l85 n  
 l86 n  
 l87 n  
 l88 n  
 l89 n  
 l90 n  
 l91 n  
 l92 n  
 l93 n  
 l94 n  
 l95 n  
 l96 n  
 l97 n  
 l98 n  
 l99 n  
 l100 n  
 l101 n  
 l102 n  
 l103 n  
 l104 n  
 l105 n  
 l106 n  
 l107 n  
 l108 n  
 l109 n  
 l110 n  
 l111 n  
 l112 n  
 l113 n  
 l114 n  
 l115 n  
 l116 n  
 l117 n  
 l118 n  
 l119 n  
 l120 n  
 l121 n  
 l122 n  
 l123 n  
 l124 n  
 l125 n  
 l126 n  
 l127 n  
 l128 n  
 l129 n  
 l130 n  
 l131 n  
 l132 n  
 l133 n  
 l134 n  
 l135 n  
 l136 n  
 l137 n  
 l138 n  
 l139 n  
 l140 n  
 l141 n  
 l142 n  
 l143 n  
 l144 n  
 l145 n  
 l146 n  
 l147 n  
 l148 n  
 l149 n  
 l150 n  
 l151 n  
 l152 n  
 l153 n  
 l154 n  
 l155 n  
 l156 n  
 l157 n  
 l158 n  
 l159 n  
 l160 n  
 l161 n  
 l162 n  
 l163 n  
 l164 n  
 l165 n  
 l166 n  
 l167 n  
 l168 n  
 l169 n  
 l170 n  
 l171 n  
 l172 n  
 l173 n  
 l174 n  
 l175 n  
 l176 n  
 l177 n  
 l178 n  
 l179 n  
 l180 n  
 l181 n  
 l182 n  
 l183 n  
 l184 n  
 l185 n  
 l186 n  
 l187 n  
 l188 n  
 l189 n  
 l190 n  
 l191 n  
 l192 n  
 l193 n  
 l194 n  
 l195 n  
 l196 n  
 l197 n  
 l198 n  
 l199 n  
 l200 n  
 l201 n  
 l202 n  
 l203 n  
 l204 n  
 l205 n  
 l206 n  
 l207 n  
 l208 n  
 l209 n  
 l210 n  
 l211 n  
 l212 n  
 l213 n  
 l214 n  
 l215 n  
 l216 n  
 l217 n  
 l218 n  
 l219 n  
 l220 n  
 l221 n  
 l222 n  
 l223 n  
 l224 n  
 l225 n  
 l226 n  
 l227 n  
 l228 n  
 l229 n  
 l230 n  
 l231 n  
 l232 n  
 l233 n  
 l234 n  
 l235 n  
 l236 n  
 l237 n  
 l238 n  
 l239 n  
 l240 n  
 l241 n  
 l242 n  
 l243 n  
 l244 n  
 l245 n  
 l246 n  
 l247 n  
 l248 n  
 l249 n  
 l250 n  
 l251 n  
 l252 n  
 l253 n  
 l254 n  
 l255 n  
 l256 n  
 l257 n  
 l258 n  
 l259 n  
 l260 n  
 l261 n  
 l262 n  
 l263 n  
 l264 n  
 l265 n  
 l266 n  
 l267 n  
 l268 n  
 l269 n  
 l270 n  
 l271 n  
 l272 n  
 l273 n  
 l274 n  
 l275 n  
 l276 n  
 l277 n  
 l278 n  
 l279 n  
 l280 n  
 l281 n  
 l282 n  
 l283 n  
 l284 n  
 l285 n  
 l286 n  
 l287 n  
 l288 n  
 l289 n  
 l290 n  
 l291 n  
 l292 n  
 l293 n  
 l294 n  
 l295 n  
 l296 n  
 l297 n  
 l298 n  
 l299 n  
 l300 n  
 l301 n  
 l302 n  
 l303 n  
 l304 n  
 l305 n  
 l306 n  
 l307 n  
 l308 n  
 l309 n  
 l310 n  
 l311 n  
 l312 n  
 l313 n  
 l314 n  
 l315 n  
 l316 n  
 l317 n  
 l318 n  
 l319 n  
 l320 n  
 l321 n  
 l322 n  
 l323 n  
 l324 n  
 l325 n  
 l326 n  
 l327 n  
 l328 n  
 l329 n  
 l330 n  
 l331 n  
 l332 n  
 l333 n  
 l334 n  
 l335 n  
 l336 n  
 l337 n  
 l338 n  
 l339 n  
 l340 n  
 l341 n  
 l342 n  
 l343 n  
 l344 n  
 l345 n  
 l346 n  
 l347 n  
 l348 n  
 l349 n  
 l350 n  
 l351 n  
 l352 n  
 l353 n  
 l354 n  
 l355 n  
 l356 n  
 l357 n  
 l358 n  
 l359 n  
 l360 n  
 l361 n  
 l362 n  
 l363 n  
 l364 n  
 l365 n  
 l366 n  
 l367 n  
 l368 n  
 l369 n  
 l370 n  
 l371 n  
 l372 n  
 l373 n  
 l374 n  
 l375 n  
 l376 n  
 l377 n  
 l378 n  
 l379 n  
 l380 n  
 l381 n  
 l382 n  
 l383 n  
 l384 n  
 l385 n  
 l386 n  
 l387 n  
 l388 n  
 l389 n  
 l390 n  
 l391 n  
 l392 n  
 l393 n  
 l394 n  
 l395 n  
 l396 n  
 l397 n  
 l398 n  
 l399 n  
 l400 n  
 l401 n  
 l402 n  
 l403 n  
 l404 n  
 l405 n  
 l406 n  
 l407 n  
 l408 n  
 l409 n  
 l410 n  
 l411 n  
 l412 n  
 l413 n  
 l414 n  
 l415 n  
 l416 n  
 l417 n  
 l418 n  
 l419 n  
 l420 n  
 l421 n  
 l422 n  
 l423 n  
 l424 n  
 l425 n  
 l426 n  
 l427 n  
 l428 n  
 l429 n  
 l430 n  
 l431 n  
 l432 n  
 l433 n  
 l434 n  
 l435 n  
 l436 n  
 l437 n  
 l438 n  
 l439 n  
 l440 n  
 l441 n  
 l442 n  
 l443 n  
 l444 n  
 l445 n  
 l446 n  
 l447 n  
 l448 n  
 l449 n  
 l450 n  
 l451 n  
 l452 n  
 l453 n  
 l454 n  
 l455 n  
 l456 n  
 l457 n  
 l458 n  
 l459 n  
 l460 n  
 l461 n  
 l462 n  
 l463 n  
 l464 n  
 l465 n  
 l466 n  
 l467 n  
 l468 n  
 l469 n  
 l470 n  
 l471 n  
 l472 n  
 l473 n  
 l474 n  
 l475 n  
 l476 n  
 l477 n  
 l478 n  
 l479 n  
 l480 n  
 l481 n  
 l482 n  
 l483 n  
 l484 n  
 l485 n  
 l486 n  
 l487 n  
 l488 n  
 l489 n  
 l490 n  
 l491 n  
 l492 n  
 l493 n  
 l494 n  
 l495 n  
 l496 n  
 l497 n  
 l498 n  
 l499 n  
 l500 n  
 l501 n  
 l502 n  
 l503 n  
 l504 n  
 l505 n  
 l506 n  
 l507 n  
 l508 n  
 l509 n  
 l510 n  
 l511 n  
 l512 n  
 l513 n  
 l514 n  
 l515 n  
 l516 n  
 l517 n  
 l518 n  
 l519 n  
 l520 n  
 l521 n  
 l522 n  
 l523 n  
 l524 n  
 l525 n  
 l526 n  
 l527 n  
 l528 n  
 l529 n  
 l530 n  
 l531 n  
 l532 n  
 l533 n  
 l534 n  
 l535 n  
 l536 n  
 l537 n  
 l538 n  
 l539 n  
 l540 n  
 l541 n  
 l542 n  
 l543 n  
 l544 n  
 l545 n  
 l546 n  
 l547 n  
 l548 n  
 l549 n  
 l550 n  
 l551 n  
 l552 n  
 l553 n  
 l554 n  
 l555 n  
 l556 n  
 l557 n  
 l558 n  
 l559 n  
 l560 n  
 l561 n  
 l562 n  
 l563 n  
 l564 n  
 l565 n  
 l566 n  
 l567 n  
 l568 n  
 l569 n  
 l570 n  
 l571 n  
 l572 n  
 l573 n  
 l574 n  
 l575 n  
 l576 n  
 l577 n  
 l578 n  
 l579 n  
 l580 n  
 l581 n  
 l582 n  
 l583 n  
 l584 n  
 l585 n  
 l586 n  
 l587 n  
 l588 n  
 l589 n  
 l590 n  
 l591 n  
 l592 n  
 l593 n  
 l594 n  
 l595 n  
 l596 n  
 l597 n  
 l598 n  
 l599 n  
 l600 n  
 l601 n  
 l602 n  
 l603 n  
 l604 n  
 l605 n  
 l606 n  
 l607 n  
 l608 n  
 l609 n  
 l610 n  
 l611 n  
 l612 n  
 l613 n  
 l614 n  
 l615 n  
 l616 n  
 l617 n  
 l618 n  
 l619 n  
 l620 n  
 l621 n  
 l622 n  
 l623 n  
 l624 n  
 l625 n  
 l626 n  
 l627 n  
 l628 n  
 l629 n  
 l630 n  
 l631 n  
 l632 n  
 l633 n  
 l634 n  
 l635 n  
 l636 n  
 l637 n  
 l638 n  
 l639 n  
 l640 n  
 l641 n  
 l642 n  
 l643 n  
 l644 n  
 l645 n  
 l646 n  
 l647 n  
 l648 n  
 l649 n  
 l650 n  
 l651 n  
 l652 n  
 l653 n  
 l654 n  
 l655 n  
 l656 n  
 l657 n  
 l658 n  
 l659 n  
 l660 n  
 l661 n  
 l662 n  
 l663 n  
 l664 n  
 l665 n  
 l666 n  
 l667 n  
 l668 n  
 l669 n  
 l670 n  
 l671 n  
 l672 n  
 l673 n  
 l674 n  
 l675 n  
 l676 n  
 l677 n  
 l678 n  
 l679 n  
 l680 n  
 l681 n  
 l682 n  
 l683 n  
 l684 n  
 l685 n  
 l686 n  
 l687 n  
 l688 n  
 l689 n  
 l690 n  
 l691 n  
 l692 n  
 l693 n  
 l694 n  
 l695 n  
 l696 n  
 l697 n  
 l698 n  
 l699 n  
 l700 n  
 l701 n  
 l702 n  
 l703 n  
 l704 n  
 l705 n  
 l706 n  
 l707 n  
 l708 n  
 l709 n  
 l710 n  
 l711 n  
 l712 n  
 l713 n  
 l714 n  
 l715 n  
 l716 n  
 l717 n  
 l718 n  
 l719 n  
 l720 n  
 l721 n  
 l722 n  
 l723 n  
 l724 n  
 l725 n  
 l726 n  
 l727 n  
 l728 n  
 l729 n  
 l730 n  
 l731 n  
 l732 n  
 l733 n  
 l734 n  
 l735 n  
 l736 n  
 l737 n  
 l738 n  
 l739 n  
 l740 n  
 l741 n  
 l742 n  
 l743 n  
 l744 n  
 l745 n  
 l746 n  
 l747 n  
 l748 n  
 l749 n  
 l750 n  
 l751 n  
 l752 n  
 l753 n  
 l754 n  
 l755 n  
 l756 n  
 l757 n  
 l758 n  
 l759 n  
 l760 n  
 l761 n  
 l762 n  
 l763 n  
 l764 n  
 l765 n  
 l766 n  
 l767 n  
 l768 n  
 l769 n  
 l770 n  
 l771 n  
 l772 n  
 l773 n  
 l774 n  
 l775 n  
 l776 n  
 l777 n  
 l778 n  
 l779 n  
 l780 n  
 l781 n  
 l782 n  
 l783 n  
 l784 n  
 l785 n  
 l786 n  
 l787 n  
 l788 n  
 l789 n  
 l790 n  
 l791 n  
 l792 n  
 l793 n  
 l794 n  
 l795 n  
 l796 n  
 l797 n  
 l798 n  
 l799 n  
 l800 n  
 l801 n  
 l802 n  
 l803 n  
 l804 n  
 l805 n  
 l806 n  
 l807 n  
 l808 n  
 l809 n  
 l810 n  
 l811 n  
 l812 n  
 l813 n  
 l814 n  
 l815 n  
 l816 n  
 l817 n  
 l818 n  
 l819 n  
 l820 n  
 l821 n  
 l822 n  
 l823 n  
 l824 n  
 l825 n  
 l826 n  
 l827 n  
 l828 n  
 l829 n  
 l830 n  
 l831 n  
 l832 n  
 l833 n  
 l834 n  
 l835 n  
 l836 n  
 l837 n  
 l838 n  
 l839 n  
 l840 n  
 l841 n  
 l842 n  
 l843 n  
 l844 n  
 l845 n  
 l846 n  
 l847 n  
 l848 n  
 l849 n  
 l850 n  
 l851 n  
 l852 n  
 l853 n  
 l854 n  
 l855 n  
 l856 n  
 l857 n  
 l858 n  
 l859 n  
 l860 n  
 l861 n  
 l862 n  
 l863 n  
 l864 n  
 l865 n  
 l866 n  
 l867 n  
 l868 n  
 l869 n  
 l870 n  
 l871 n  
 l872 n  
 l873 n  
 l874 n  
 l875 n  
 l876 n  
 l877 n  
 l878 n  
 l879 n  
 l880 n  
 l881 n  
 l882 n  
 l883 n  
 l884 n  
 l885 n  
 l886 n  
 l887 n  
 l888 n  
 l889 n  
 l890 n  
 l891 n  
 l892 n  
 l893 n  
 l894 n  
 l895 n  
 l896 n  
 l897 n  
 l898 n  
 l899 n  
 l900 n  
 l901 n  
 l902 n  
 l903 n  
 l904 n  
 l905 n  
 l906 n  
 l907 n  
 l908 n  
 l909 n  
 l910 n  
 l911 n  
 l912 n  
 l913 n  
 l914 n  
 l915 n  
 l916 n  
 l917 n  
 l918 n  
 l919 n  
 l920 n  
 l921 n  
 l922 n  
 l923 n  
 l924 n  
 l925 n  
 l926 n  
 l927 n  
 l928 n  
 l929 n  
 l930 n  
 l931 n  
 l932 n  
 l933 n  
 l934 n  
 l935 n  
 l936 n  
 l937 n  
 l938 n  
 l939 n  
 l940 n  
 l941 n  
 l942 n  
 l943 n  
 l944 n  
 l945 n  
 l946 n  
 l947 n  
 l948 n  
 l949 n  
 l950 n  
 l951 n  
 l952 n  
 l953 n  
 l954 n  
 l955 n  
 l956 n  
 l957 n  
 l958 n  
 l959 n  
 l960 n  
 l961 n  
 l962 n  
 l963 n  
 l964 n  
 l965 n  
 l966 n  
 l967 n  
 l968 n  
 l969 n  
 l970 n  
 l971 n  
 l972 n  
 l973 n  
 l974 n  
 l975 n  
 l976 n  
 l977 n  
 l978 n  
 l979 n  
 l980 n  
 l981 n  
 l982 n  
 l983 n  
 l984 n  
 l985 n  
 l986 n  
 l987 n  
 l988 n  
 l989 n  
 l990 n  
 l991 n  
 l992 n  
 l993 n  
 l994 n  
 l995 n  
 l996 n  
 l997 n  
 l998 n  
 l999 n  
 l1000 n  
 l1001 n  
 l1002 n  
 l1003 n  
 l1004 n  
 l1005 n  
 l1006 n  
 l1007 n  
 l1008 n  
 l1009 n  
 l1010 n  
 l1011 n  
 l1012 n  
 l1013 n  
 l1014 n  
 l1015 n  
 l1016 n  
 l1017 n  
 l1018 n  
 l1019 n  
 l1020 n  
 l1021 n  
 l1022 n  
 l1023 n  
 l1024 n  
 l1025 n  
 l1026 n  
 l1027 n  
 l1028 n  
 l1029 n  
 l1030 n  
 l1031 n  
 l1032 n  
 l1033 n  
 l1034 n  
 l1035 n  
 l1036 n  
 l1037 n  
 l1038 n  
 l1039 n  
 l1040 n  
 l1041 n  
 l1042 n  
 l1043 n  
 l1044 n  
 l1045 n  
 l1046 n  
 l1047 n  
 l1048 n  
 l1049 n  
 l1050 n  
 l1051 n  
 l1052 n  
 l1053 n  
 l1054 n  
 l1055 n  
 l1056 n  
 l1057 n  
 l1058 n  
 l1059 n  
 l1060 n  
 l1061 n  
 l1062 n  
 l1063 n  
 l1064 n  
 l1065 n  
 l1066 n  
 l1067 n  
 l1068 n  
 l1069 n  
 l1070 n  
 l1071 n  
 l1072 n  
 l1073 n  
 l1074 n  
 l1075 n  
 l1076 n  
 l1077 n  
 l1078 n  
 l1079 n  
 l1080 n  
 l1081 n  
 l1082 n  
 l1083 n  
 l1084 n  
 l1085 n  
 l1086 n  
 l1087 n  
 l1088 n  
 l1089 n  
 l1090 n  
 l1091 n  
 l1092 n  
 l1093 n  
 l1094 n  
 l1095 n  
 l1096 n  
 l1097 n  
 l1098 n  
 l1099 n  
 l1100 n  
 l1101 n  
 l1102 n  
 l1103 n  
 l1104 n  
 l1105 n  
 l1106 n  
 l1107 n  
 l1108 n  
 l1109 n  
 l1110 n  
 l1111 n  
 l1112 n  
 l1113 n  
 l1114 n  
 l1115 n  
 l1116 n  
 l1117 n  
 l1118 n  
 l1119 n  
 l1120 n  
 l1121 n  
 l1122 n  
 l1123 n  
 l1124 n  
 l1125 n  
 l1126 n  
 l1127 n  
 l1128 n  
 l1129 n  
 l1130 n  
 l1131 n  
 l1132 n  
 l1133 n  
 l1134 n  
 l1135 n  
 l1136 n  
 l1137 n  
 l1138 n  
 l1139 n  
 l1140 n  
 l1141 n  
 l1142 n  
 l1143 n  
 l1144 n  
 l1145 n  
 l1146 n  
 l1147 n  
 l1148 n  
 l1149 n  
 l1150 n  
 l1151 n  
 l1152 n  
 l1153 n  
 l1154 n  
 l1155 n  
 l1156 n  
 l1157 n  
 l1158 n  
 l1159 n  
 l1160 n  
 l1161 n  
 l1162 n  
 l1163 n  
 l1164 n  
 l1165 n  
 l1166 n  
 l1167 n  
 l1168 n  
 l1169 n  
 l1170 n  
 l1171 n  
 l1172 n  
 l1173 n  
 l1174 n  
 l1175 n  
 l1176 n  
 l1177 n  
 l1178 n  
 l1179 n  
 l1180 n  
 l1181 n  
 l1182 n  
 l1183 n  
 l1184 n  
 l1185 n  
 l1186 n  
 l1187 n  
 l1188 n  
 l1189 n  
 l1190 n  
 l1191 n  
 l1192 n  
 l1193 n  
 l1194 n  
 l1195 n  
 l1196 n  
 l1197 n  
 l1198 n  
 l1199 n  
 l1200 n  
 l1201 n  
 l1202 n  
 l1203 n  
 l1204 n  
 l1205 n  
 l1206 n  
 l1207 n  
 l1208 n  
 l1209 n  
 l1210 n  
 l1211 n  
 l1212 n  
 l1213 n  
 l1214 n  
 l1215 n  
 l1216 n  
 l1217 n  
 l1218 n  
 l1219 n  
 l1220 n  
 l1221 n  
 l1222 n  
 l1223 n  
 l1224 n  
 l1225 n  
 l1226 n  
 l1227 n  
 l1228 n  
 l1229 n  
 l1230 n  
 l1231 n  
 l1232 n  
 l1233 n  
 l1234 n  
 l1235 n  
 l1236 n  
 l1237 n  
 l1238 n  
 l1239 n  
 l1240 n  
 l1241 n  
 l1242 n  
 l1243 n  
 l1244 n  
 l1245 n  
 l1246 n  
 l1247 n  
 l1248 n  
 l1249 n  
 l1250 n  
 l1251 n  
 l1252 n  
 l1253 n  
 l1254 n  
 l1255 n  
 l1256 n  
 l1257 n  
 l1258 n  
 l1259 n  
 l1260 n  
 l1261 n  
 l1262 n  
 l1263 n  
 l1264 n  
 l1265 n  
 l1266 n  
 l1267 n  
 l1268 n  
 l1269 n  
 l1270 n  
 l1271 n  
 l1272 n  
 l1273 n  
 l1274 n  
 l1275 n  
 l1276 n  
 l1277 n  
 l1278 n  
 l1279 n  
 l1280 n  
 l1281 n  
 l1282 n  
 l1283 n  
 l1284 n  
 l1285 n  
 l1286 n  
 l1287 n  
 l1288 n  
 l1289 n  
 l1290 n  
 l1291 n  
 l1292 n  
 l1293 n  
 l1294 n  
 l1295 n  
 l1296 n  
 l1297 n  
 l1298 n  
 l1299 n  
 l1300 n  
 l1301 n  
 l1302 n  
 l1303 n  
 l1304 n  
 l1305 n  
 l1306 n  
 l1307 n  
 l1308 n

## STANDARD PROTON PARAMETERS

exp1 s2pu1

|             |                             |           |            |
|-------------|-----------------------------|-----------|------------|
| SAMPLE      |                             | DEC. & VT |            |
| date        | Feb 23 2009                 | dfreq     | 125.672    |
| solvent     | CDCl3                       | dn        | C13        |
| file        | /data/gru/15m-13-034-11.fid | dpwr      | 30         |
| ACQUISITION |                             | dm        | 0          |
| sfreq       | 499.746                     | dmm       | mm         |
| tn          | 499.746                     | dms       | mm         |
| at          | 3.001                       | dseq      | 10000      |
| np          | 63050                       | dres      | 1.0        |
| sw          | 10504.2                     | homo      | n          |
| fb          | not used                    | temp      | 20.0       |
| bs          | not used                    | DEC2      |            |
| tpwr        | 56                          | dfreq2    | 0          |
| pw          | 8.6                         | dn2       | 1          |
| dl          | 2.000                       | dpwr2     | 0          |
| tof         | 1519.5                      | dfreq2    | 0          |
| nt          | 16                          | dm2       | n          |
| ct          | 8                           | dmm2      | c          |
| atlock      | n                           | dmf2      | 200        |
| gain        | not used                    | dseq2     | 1.0        |
| flags       | n                           | dres2     | n          |
| l1          | n                           | homo2     | 0          |
| ln          | y                           | dfreq3    | DEC3       |
| dp          | mn                          | dn3       | 0          |
| hs          | mn                          | dpwr3     | 1          |
| sp          | 4.4                         | dn3       | 0          |
| wp          | 3993.2                      | dm3       | n          |
| vs          | 38                          | dmm3      | c          |
| sc          | 0                           | dmf3      | 200        |
| WC          | 250                         | dseq3     | 1.0        |
| h2nm        | 15.37                       | dres3     | n          |
| is          | 33.57                       | homo3     | 1.0        |
| rf1         | 1233.6                      | wtflie    | PROCESSING |
| th          | 7                           | proc      | ft         |
| ins         | 1.000                       | tn        | 262144     |
| al          | ph                          | math      | f          |
|             |                             | weff      | wft        |
|             |                             | wexp      |            |
|             |                             | wbs       |            |
|             |                             | wnt       |            |

Table 3, entry 1

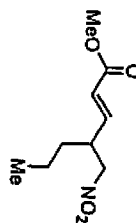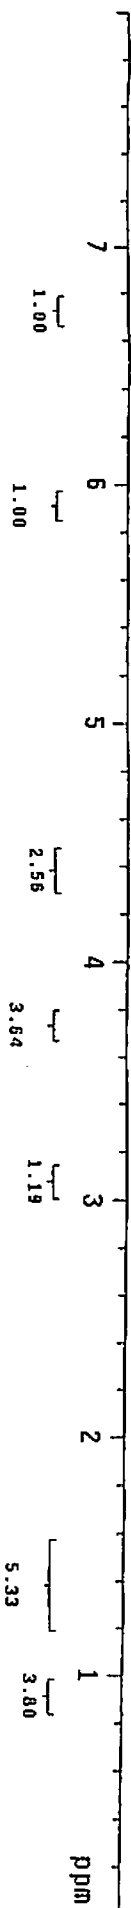

# STANDARD PROTON PARAMETERS

expi s2pu1

SAMPLE DEC. 8 VT  
 date Feb 15 2009 dfrq 125.672  
 solvent CDCl3 dn C13  
 file /data/export/~ dpwr 30  
 home/gfu/Tsm/bu11~ dof 0  
 lmk1e/Tsm-13-018-H- dm nm  
 .fid mm  
 ACQUISITION  
 sfrq 499.746 dmf 10000  
 tn h1 dres 1.0  
 at 3.001 homo n  
 np 63050  
 sv 10584.2 wffile ft  
 fb not used proc 202144  
 us 8 fh  
 tpwr 56 math f  
 pw 8.6  
 dl 2.000 weff  
 tof 1519.5 wepp  
 nt 15 wbs  
 ct 0 wnt  
 atlock n  
 gain not used wft  
 FLAGS  
 l1 n  
 ln n  
 dp y  
 hs nm  
 DISPLAY  
 sp -0.8  
 wp 4000.2  
 vs 47  
 sc 0  
 wc 250  
 hzmm 16.00  
 is 38.57  
 rfp 1293.6  
 th 0  
 ins 7  
 al 1.000  
 ph

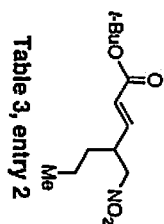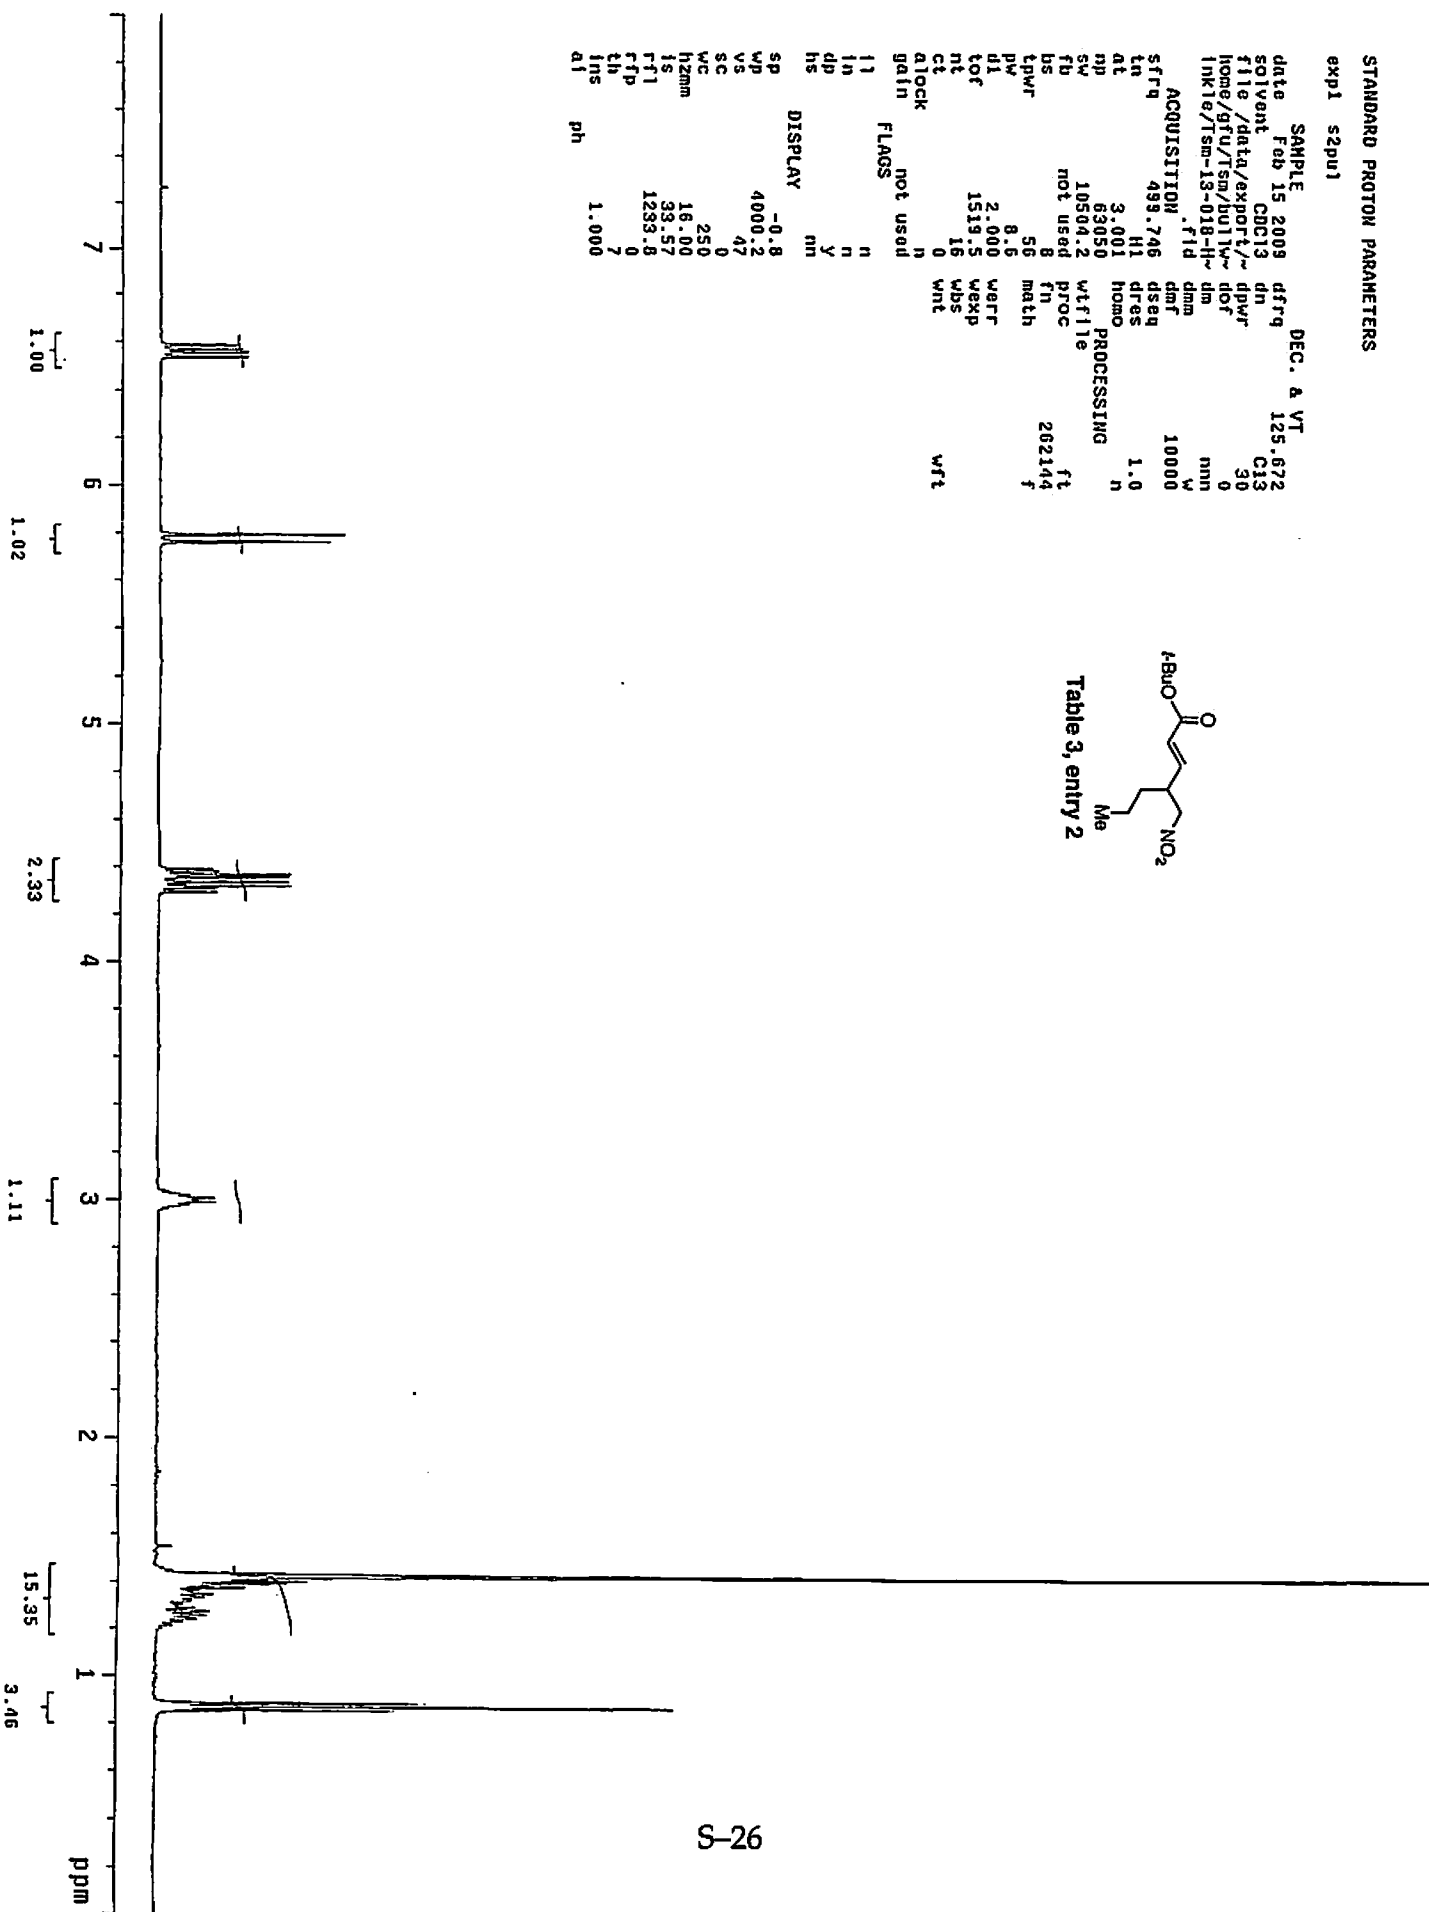

# STANDARD PROTON PARAMETERS

expi szpu1

|                   |               |           |         |
|-------------------|---------------|-----------|---------|
| SAMPLE            |               | DEC. & VT |         |
| date              | Feb 23 2009   | dfrq      | 125.672 |
| solvent           | CDCl3         | dn        | C13     |
| file              | /data/gfu/TSM | dof       | 30      |
| /TSM-13-035-H.fid |               | dm        | nmh     |
| ACQUISITION       |               | dm        | w       |
| sfrq              | 499.746       | dmm       | 10000   |
| in                | H1            | dof2      | 1.0     |
| al                | 3.001         | dres      | n       |
| np                | 63050         | homo      | 20.0    |
| sw                | 10500.2       | temp      | DEC2    |
| fb                | not used      |           |         |
| bs                | 8             | dfrq2     | 0       |
| lpwr              | 56            | dn2       | 1       |
| pw                | 8.6           | dprf2     | 0       |
| d1                | 2.000         | dof2      | n       |
| tof               | 1519.5        | dm2       | c       |
| nt                | 16            | dmm2      | 200     |
| cl                | 8             | dres2     | 1.0     |
| alock             | n             | homo2     | n       |
| gain              | not used      |           |         |
| flags             | not used      |           |         |
| l1                | n             | dfrq3     | 0       |
| l2                | n             | dn3       | 1       |
| l3                | y             | dprf3     | 0       |
| hs                | nm            | dof3      | n       |
| sp                | 4.4           | dmm3      | 200     |
| wp                | 3993.2        | dres3     | 1.0     |
| vs                | 71            | homo3     | n       |
| sc                | 0             | temp      | DEC3    |
| wc                | 250           |           |         |
| h2mm              | 15.97         |           |         |
| is                | 33.57         |           |         |
| rfl               | 1233.8        |           |         |
| rflp              | 0             |           |         |
| th                | 7             |           |         |
| ins               | 100.000       |           |         |
| al                | ph            |           |         |

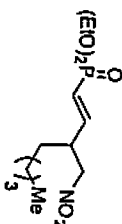

Table 3, entry 3

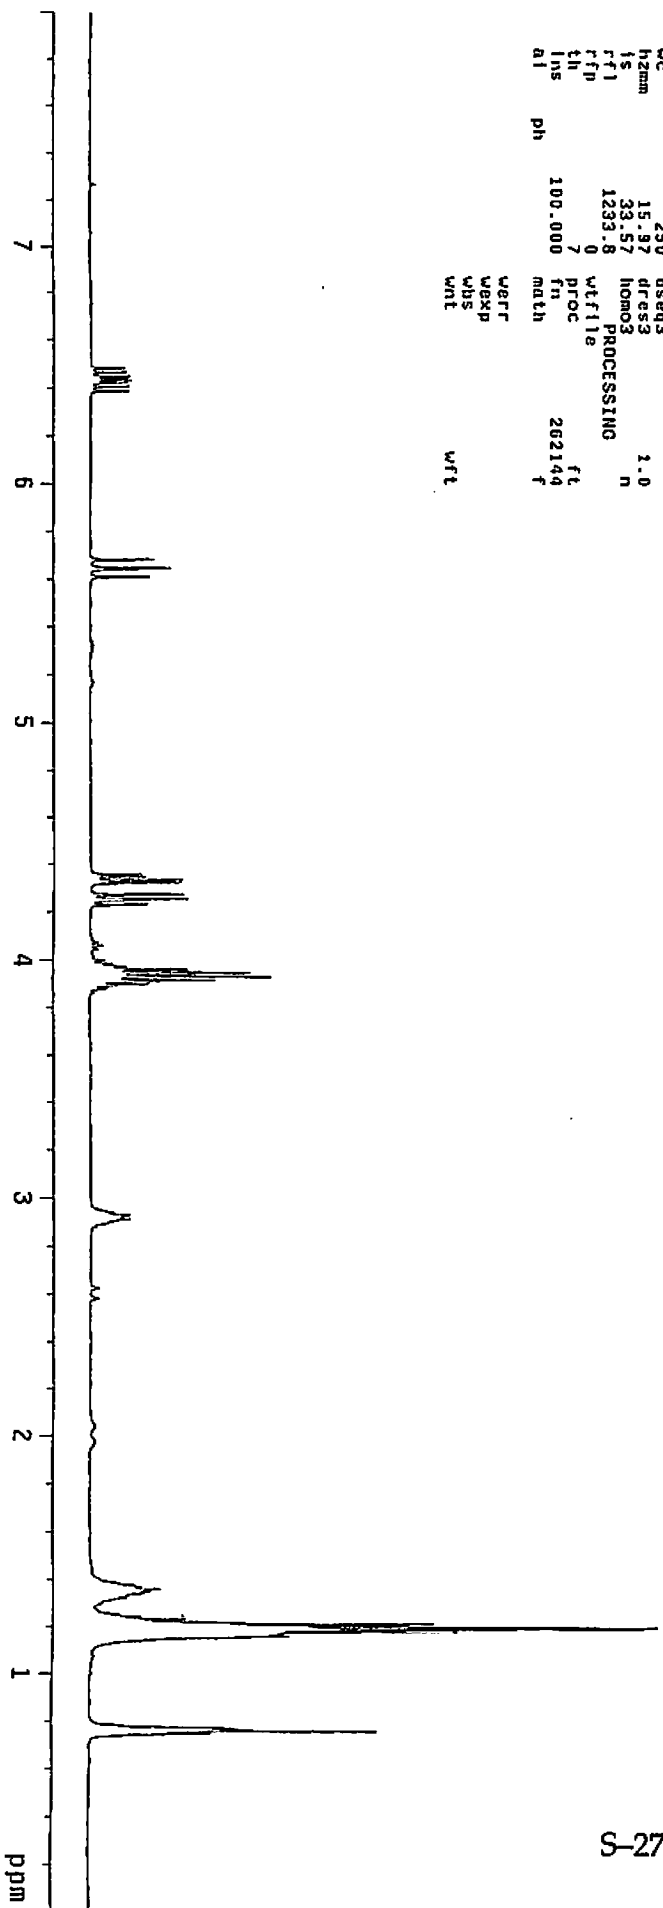

OD-H

Injection Date : 2/10/2009 10:29:36 PM  
 Sample Name :  
 Acq. Operator : SM  
 Different Inj Volume from Sequence :  
 Acq. Method : C:\MSDCHEM\1\METHODS\05-60-1.M  
 Last Changed : 3/9/2007 8:41:24 AM by EL  
 Analysis Method : C:\MSDCHEM\1\METHODS\01-75-1.M  
 Last changed : 2/10/2009 4:07:32 PM by SM

Seq. Line : 9  
 Location : Vial 1  
 Inj Volume : 1  
 Inj Volume : 5 µl  
 Inj Volume : 8 µl

Table 2, entry 1

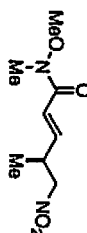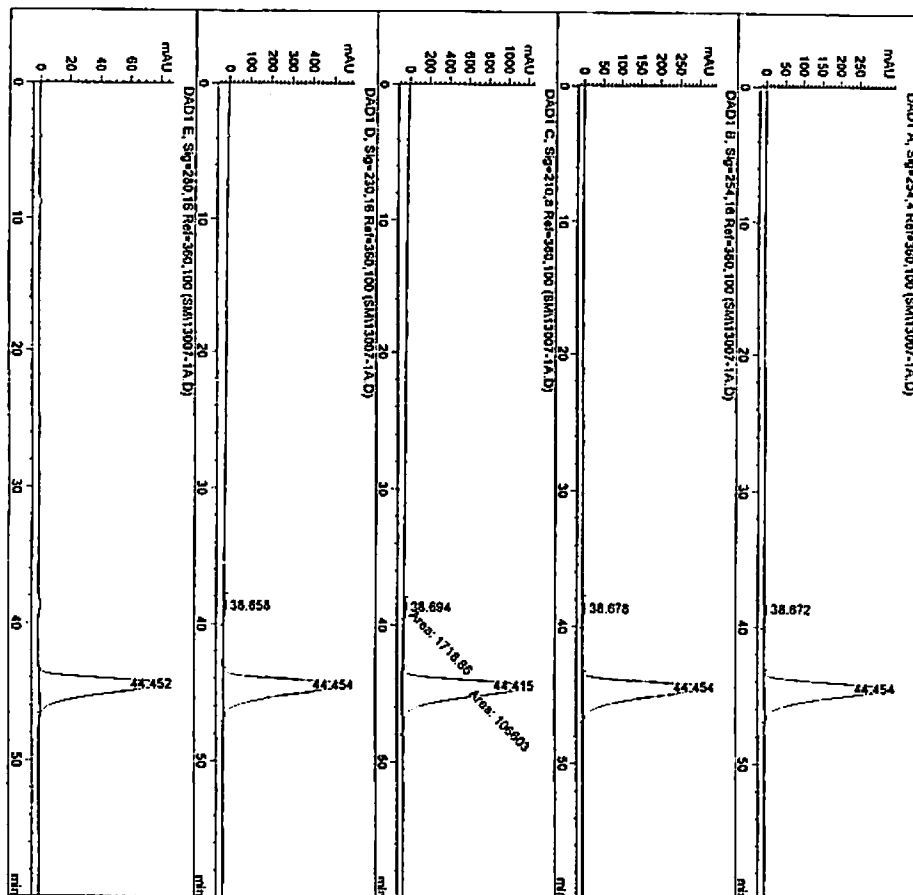

## Area Percent Report

Sorted By : Signal  
 Multiplier : 1.0000  
 Dilution : 1.0000  
 Use Multiplier & Dilution Factor with ISTDs

Signal 1: DAD1 A, Sig=254,16 Ref=360,100

| Peak #   | Retention Time (min) | Width (min) | Area (mAU*s) | Height (mAU) | Area %  |
|----------|----------------------|-------------|--------------|--------------|---------|
| 1        | 38.672 BP            | 0.6864      | 363.56030    | 6.28910      | 1.4231  |
| 2        | 44.454 BB            | 1.0796      | 2.51485e4    | 329.08517    | 98.5749 |
| Totals : |                      |             | 2.55120e4    | 335.37427    |         |

Results obtained with enhanced integrator!

Signal 2: DAD1 B, Sig=254,16 Ref=360,100

| Peak #   | Retention Time (min) | Width (min) | Area (mAU*s) | Height (mAU) | Area %  |
|----------|----------------------|-------------|--------------|--------------|---------|
| 1        | 38.678 BP            | 0.6885      | 361.97119    | 6.20594      | 1.4313  |
| 2        | 44.454 BB            | 1.1042      | 2.49286e4    | 325.96777    | 98.5687 |
| Totals : |                      |             | 2.52905e4    | 332.17361    |         |

Results obtained with enhanced integrator!

Signal 3: DAD1 C, Sig=210,8 Ref=360,100

| Peak #   | Retention Time (min) | Width (min) | Area (mAU*s) | Height (mAU) | Area %  |
|----------|----------------------|-------------|--------------|--------------|---------|
| 1        | 38.694 BP            | 0.9852      | 1718.86450   | 29.07885     | 1.5868  |
| 2        | 44.415 BB            | 1.3986      | 1.06603e5    | 1270.31580   | 98.4132 |
| Totals : |                      |             | 1.08322e5    | 1299.39465   |         |

Results obtained with enhanced integrator!

Signal 4: DAD1 D, Sig=230,16 Ref=360,100

| Peak #   | Retention Time (min) | Width (min) | Area (mAU*s) | Height (mAU) | Area %  |
|----------|----------------------|-------------|--------------|--------------|---------|
| 1        | 38.658 BP            | 0.7399      | 707.64868    | 11.46887     | 1.5374  |
| 2        | 44.454 BB            | 1.0926      | 4.53211e4    | 588.40594    | 98.4626 |
| Totals : |                      |             | 4.60287e4    | 599.87481    |         |

Results obtained with enhanced integrator!

Signal 5: DAD1 E, Sig=280,16 Ref=360,100

| Peak #   | Retention Time (min) | Width (min) | Area (mAU*s) | Height (mAU) | Area %   |
|----------|----------------------|-------------|--------------|--------------|----------|
| 1        | 44.452 BB            | 1.0564      | 6322.28271   | 83.78082     | 100.0000 |
| Totals : |                      |             | 6322.28271   | 83.78082     |          |

Results obtained with enhanced integrator!

DP-H

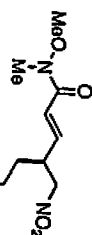

Injection Date : 2/8/2009 5:02:23 PM  
 Sample Name : SM  
 Acq. Operator : SM  
 Acq. Instrument : Instrument 1  
 Acq. Method : C:\HPCHEM\1\METHODS\05-30-1.M  
 Last Changed : 2/8/2009 5:19:13 PM by SM  
 Analysis Method : C:\HPCHEM\1\METHODS\05-30-1.M  
 Modified after loading  
 Last changed : 2/10/2009 4:07:32 PM by SM  
 DAD1 A, Sig=254, Ref=360,100 (SM\13005-1.D)

Seq. Line : 2  
 Location : Vial 2  
 Inj : 1  
 Inj Volume : 5 µl

Table 2, entry 2

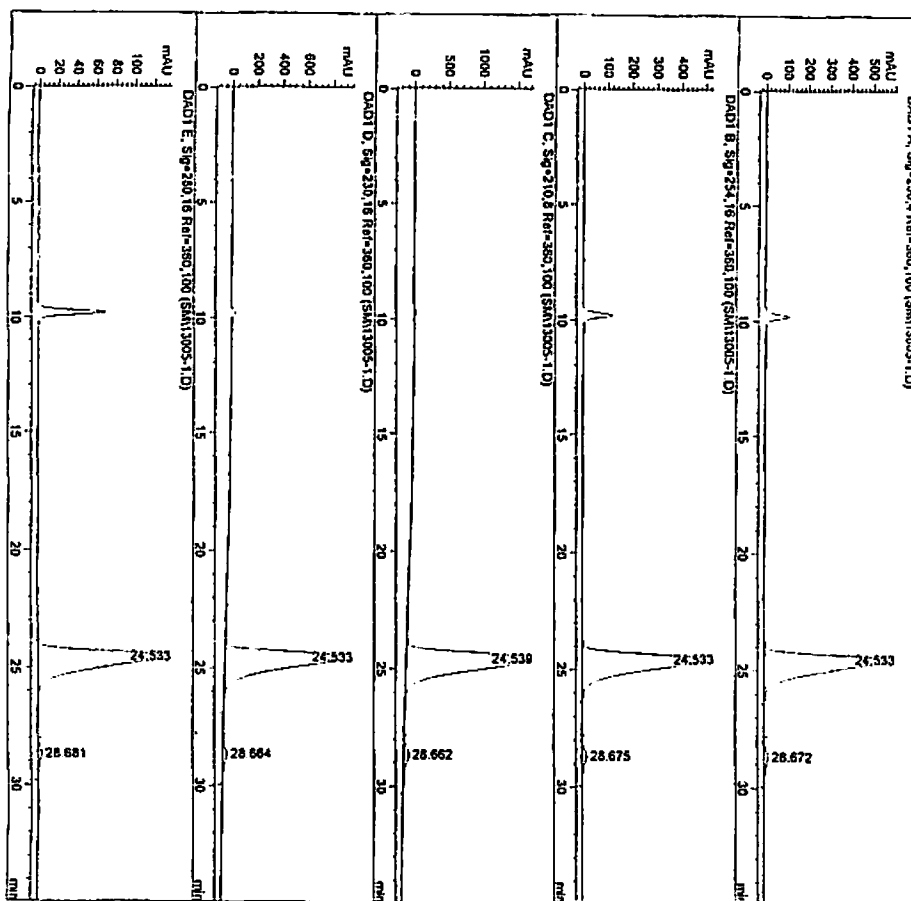

## Area Percent Report

Sorted By : Signal  
 Multiplier : 1.0000  
 Division : 1.0000  
 Use Multiplier & Division Factor with ISTDs

Signal 1: DAD1 A, Sig=250,16 Ref=360,100

| Peak #   | RetTime (min) | Type | Width (min) | Area (mAU*s) | Height (mAU) | Area %  |
|----------|---------------|------|-------------|--------------|--------------|---------|
| 1        | 24.533        | BB   | 0.7097      | 2.7462264    | 580.76164    | 96.6940 |
| 2        | 28.672        | BB   | 0.5863      | 938.95251    | 19.07285     | 3.3060  |
| Totals : |               |      |             | 2.8401164    | 599.84040    |         |

Results obtained with enhanced integrator!

Signal 2: DAD1 B, Sig=254,16 Ref=360,100

| Peak #   | RetTime (min) | Type | Width (min) | Area (mAU*s) | Height (mAU) | Area %  |
|----------|---------------|------|-------------|--------------|--------------|---------|
| 1        | 24.533        | BB   | 0.7155      | 2.4231264    | 512.62604    | 96.6803 |
| 2        | 28.675        | BB   | 0.6383      | 832.01758    | 16.50186     | 3.3197  |
| Totals : |               |      |             | 2.5063264    | 529.52789    |         |

Results obtained with enhanced integrator!

Signal 3: DAD1 C, Sig=210,8 Ref=360,100

| Peak #   | RetTime (min) | Type | Width (min) | Area (mAU*s) | Height (mAU) | Area %  |
|----------|---------------|------|-------------|--------------|--------------|---------|
| 1        | 24.533        | VB   | 0.6432      | 9.489664     | 1754.01440   | 96.2429 |
| 2        | 28.662        | BP   | 0.6886      | 3704.61230   | 75.75037     | 3.7571  |
| Totals : |               |      |             | 9.8604264    | 1829.76478   |         |

Results obtained with enhanced integrator!

Signal 4: DAD1 D, Sig=230,16 Ref=360,100

| Peak #   | RetTime (min) | Type | Width (min) | Area (mAU*s) | Height (mAU) | Area %  |
|----------|---------------|------|-------------|--------------|--------------|---------|
| 1        | 24.533        | BP   | 0.6845      | 4.5887964    | 958.59790    | 96.6958 |
| 2        | 28.664        | BB   | 0.6780      | 1568.02551   | 32.09200     | 3.3042  |
| Totals : |               |      |             | 4.7455964    | 990.68990    |         |

Results obtained with enhanced integrator!

Signal 5: DAD1 E, Sig=280,16 Ref=360,100

| Peak #   | RetTime (min) | Type | Width (min) | Area (mAU*s) | Height (mAU) | Area %  |
|----------|---------------|------|-------------|--------------|--------------|---------|
| 1        | 24.533        | BB   | 0.7058      | 6240.06641   | 132.40425    | 96.8554 |
| 2        | 28.681        | BB   | 0.5771      | 202.59367    | 4.24286      | 3.1446  |
| Totals : |               |      |             | 6442.66008   | 136.64711    |         |

OD-H

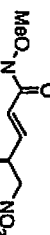

Table 2, entry 3

Injection Date : 2/10/2009 6:02:29 PM  
 Sample Name :  
 Acq. Operator : SM  
 Acq. Instrument : Instrument 1  
 Different Inj Volume from Sequence : Actual Inj Volume : 5 µl  
 Acq. Method : C:\NRCHEM\1\METHODS\03-60-1.H  
 Last changed : 7/17/2008 12:45:47 PM by SL  
 Analysis Method : C:\NRCHEM\1\METHODS\01-75-1.H  
 Last changed : 2/10/2009 4:07:32 PM by SM

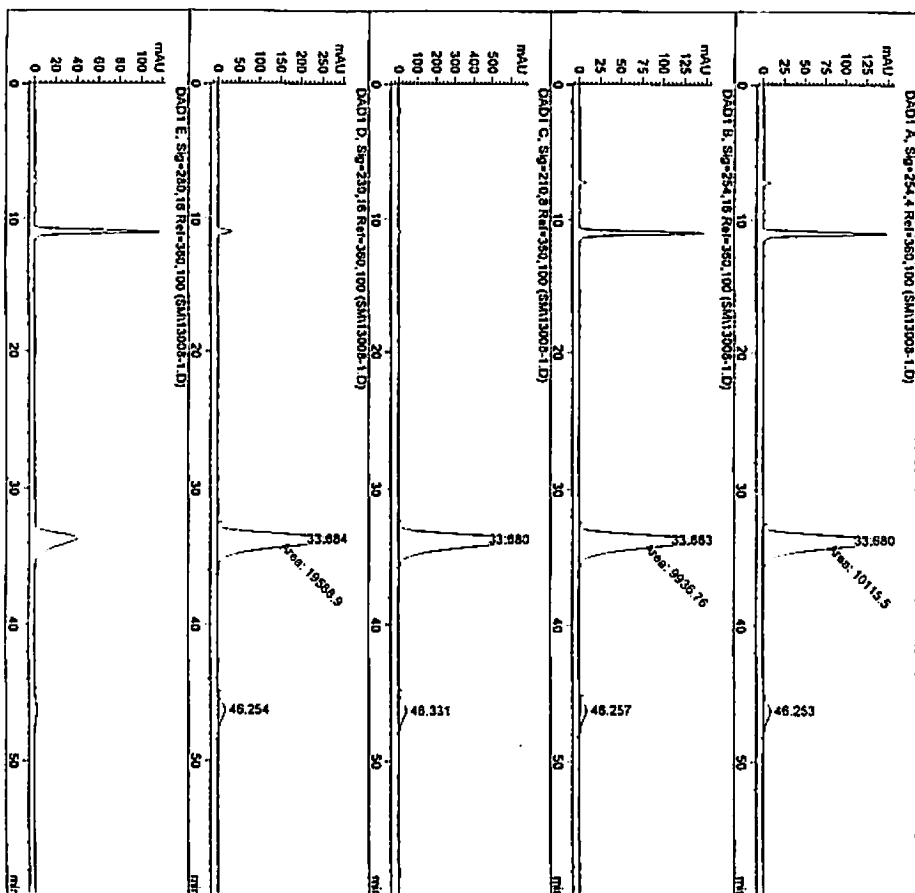

## Area Percent Report

Sorted By : Signal  
 Multiplier : 1.0000  
 Dilution : 1.0000  
 Use Multiplier & Dilution Factor with ISTDs

Signal 1: DAD1 A, Sig=254.4 Ref=360.100

| Peak #   | RetTime [min] | Width [min] | Area [mAU*s] | Height [mAU] | Area %  |
|----------|---------------|-------------|--------------|--------------|---------|
| 1        | 33.680        | 1.1113      | 1.0115e4     | 151.70935    | 93.3345 |
| 2        | 46.253        | 0.9851      | 722.39441    | 8.66036      | 6.6655  |
| Totals : |               |             | 1.08379e4    | 160.36991    |         |

Results obtained with enhanced integrator:

Signal 2: DAD1 B, Sig=254.16 Ref=360.100

| Peak #   | RetTime [min] | Width [min] | Area [mAU*s] | Height [mAU] | Area %  |
|----------|---------------|-------------|--------------|--------------|---------|
| 1        | 33.683        | 1.1038      | 9936.75586   | 150.03645    | 93.3405 |
| 2        | 46.257        | 0.9934      | 708.95245    | 8.47941      | 6.6595  |
| Totals : |               |             | 1.06457e4    | 158.51566    |         |

Results obtained with enhanced integrator:

Signal 3: DAD1 C, Sig=210.8 Ref=360.100

| Peak #   | RetTime [min] | Width [min] | Area [mAU*s] | Height [mAU] | Area %  |
|----------|---------------|-------------|--------------|--------------|---------|
| 1        | 33.680        | 0.8758      | 4.39591e4    | 662.75397    | 91.9122 |
| 2        | 46.331        | 1.0809      | 3868.17713   | 42.06319     | 6.0876  |
| Totals : |               |             | 4.78272e4    | 704.81716    |         |

Results obtained with enhanced integrator:

Signal 4: DAD1 D, Sig=230.16 Ref=360.100

| Peak #   | RetTime [min] | Width [min] | Area [mAU*s] | Height [mAU] | Area %  |
|----------|---------------|-------------|--------------|--------------|---------|
| 1        | 33.684        | 1.1046      | 1.95899e4    | 295.57217    | 92.8863 |
| 2        | 46.254        | 1.0308      | 1500.21838   | 17.21408     | 7.1137  |
| Totals : |               |             | 2.10891e4    | 312.78625    |         |

Results obtained with enhanced integrator:

Signal 5: DAD1 E, Sig=280.16 Ref=360.100

\*\*\* End of Report \*\*\*

Injection Date : 2/12/2009 7:08:06 PM  
 Seq. Line : 2  
 Location : Vial 1  
 Sample Name : SM  
 Acq. Operator : Instrument 1  
 Acq. Instrument : Instrument 1  
 Different Inj Volume from Sequence : Actual Inj Volume : 5 µl  
 Acq. Method : C:\NPHCHEM\1\METHODS\05-30-1.M  
 Last changed : 7/1/2008 11:11:04 AM by SI  
 Analysis Method : C:\NPHCHEM\1\METHODS\01-75-1.M  
 Last changed : 2/10/2009 4:07:32 PM by SM

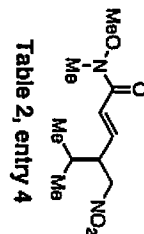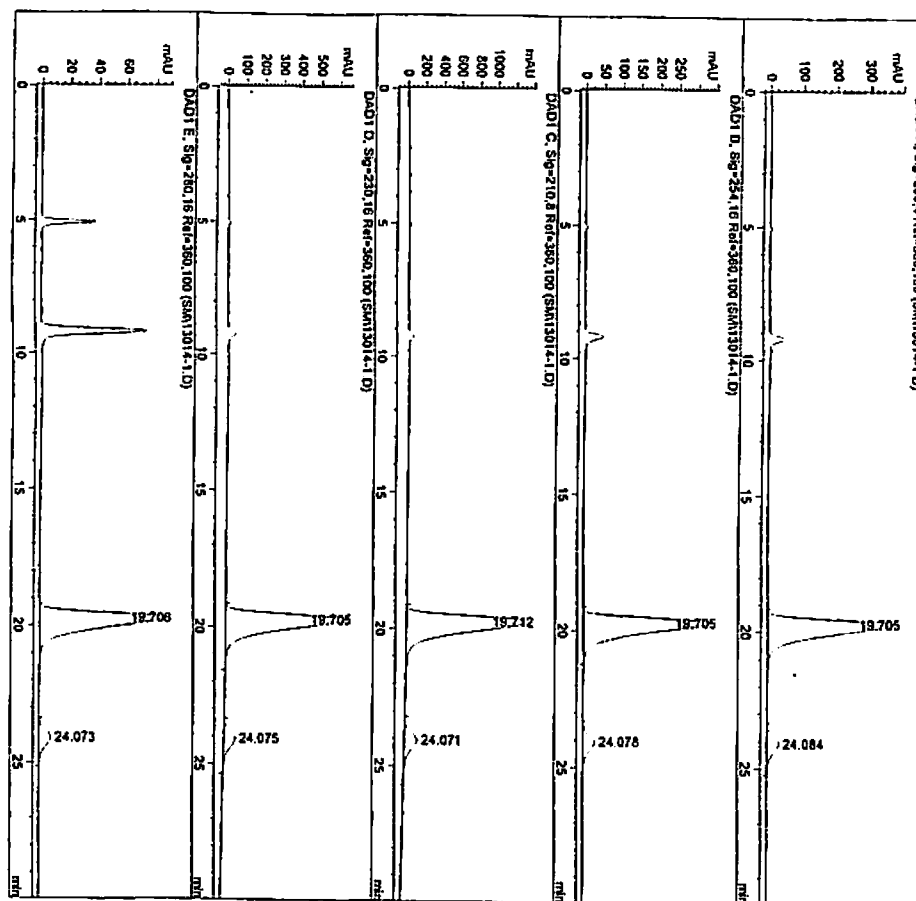

## Area Percent Report

Sorted By : Signal  
 Multiplier : 1.0000  
 Dilution : 1.0000  
 Use Multiplier & Dilution Factor with ISTDs

| Peak     | RetTime | Type | Width  | Area       | Height    | Area    |
|----------|---------|------|--------|------------|-----------|---------|
| #        | [min]   |      | [min]  | [mAU*s]    | [mAU]     | %       |
| 1        | 19.705  | BB   | 0.5641 | 1.447344   | 381.95975 | 90.3656 |
| 2        | 24.084  | BB   | 0.5953 | 1543.08093 | 35.91256  | 9.6344  |
| Totals : |         |      |        | 1.601644   | 417.87231 |         |

Results obtained with enhanced integrator:

| Peak     | RetTime | Type | Width  | Area       | Height    | Area    |
|----------|---------|------|--------|------------|-----------|---------|
| #        | [min]   |      | [min]  | [mAU*s]    | [mAU]     | %       |
| 1        | 19.705  | BB   | 0.5661 | 1.278964   | 337.50305 | 90.3324 |
| 2        | 24.078  | BB   | 0.6309 | 1368.70984 | 31.75201  | 9.6676  |
| Totals : |         |      |        | 1.415774   | 369.25506 |         |

Results obtained with enhanced integrator:

| Peak     | RetTime | Type | Width  | Area       | Height     | Area    |
|----------|---------|------|--------|------------|------------|---------|
| #        | [min]   |      | [min]  | [mAU*s]    | [mAU]      | %       |
| 1        | 19.712  | BB   | 0.5545 | 5.438544   | 1331.56702 | 89.2348 |
| 2        | 24.071  | VB   | 0.6111 | 6561.10986 | 145.23511  | 10.7652 |
| Totals : |         |      |        | 6.094764   | 1476.80212 |         |

Results obtained with enhanced integrator:

| Peak     | RetTime | Type | Width  | Area       | Height    | Area    |
|----------|---------|------|--------|------------|-----------|---------|
| #        | [min]   |      | [min]  | [mAU*s]    | [mAU]     | %       |
| 1        | 19.705  | BB   | 0.5710 | 2.428924   | 633.89062 | 90.1904 |
| 2        | 24.075  | BB   | 0.6633 | 2601.82080 | 60.75649  | 9.8096  |
| Totals : |         |      |        | 2.693104   | 694.64712 |         |

Results obtained with enhanced integrator:

| Peak     | RetTime | Type | Width  | Area       | Height   | Area    |
|----------|---------|------|--------|------------|----------|---------|
| #        | [min]   |      | [min]  | [mAU*s]    | [mAU]    | %       |
| 1        | 19.706  | BB   | 0.5568 | 3291.18262 | 87.50635 | 90.4473 |
| 2        | 24.073  | BB   | 0.5178 | 347.60388  | 8.14615  | 9.5527  |
| Totals : |         |      |        | 3638.78650 | 95.65250 |         |

Injection Date : 2/24/2009 4:50:41 PM  
 Sample Name :  
 Acq. Operator : SH  
 Acq. Instrument : Instrument 1  
 Different Inj Volume from Sequence : Actual Inj Volume : 5 µl  
 Acq. Method : C:\MSDCHEM\1\METHODS\05-40-1.M  
 Last changed : 10/30/2006 10:49:30 AM by EV  
 Analysis Method : C:\MSDCHEM\1\METHODS\005-60-1.M  
 Last changed : 2/24/2009 1:12:52 PM by SH

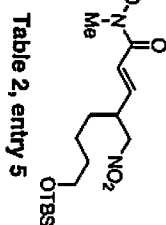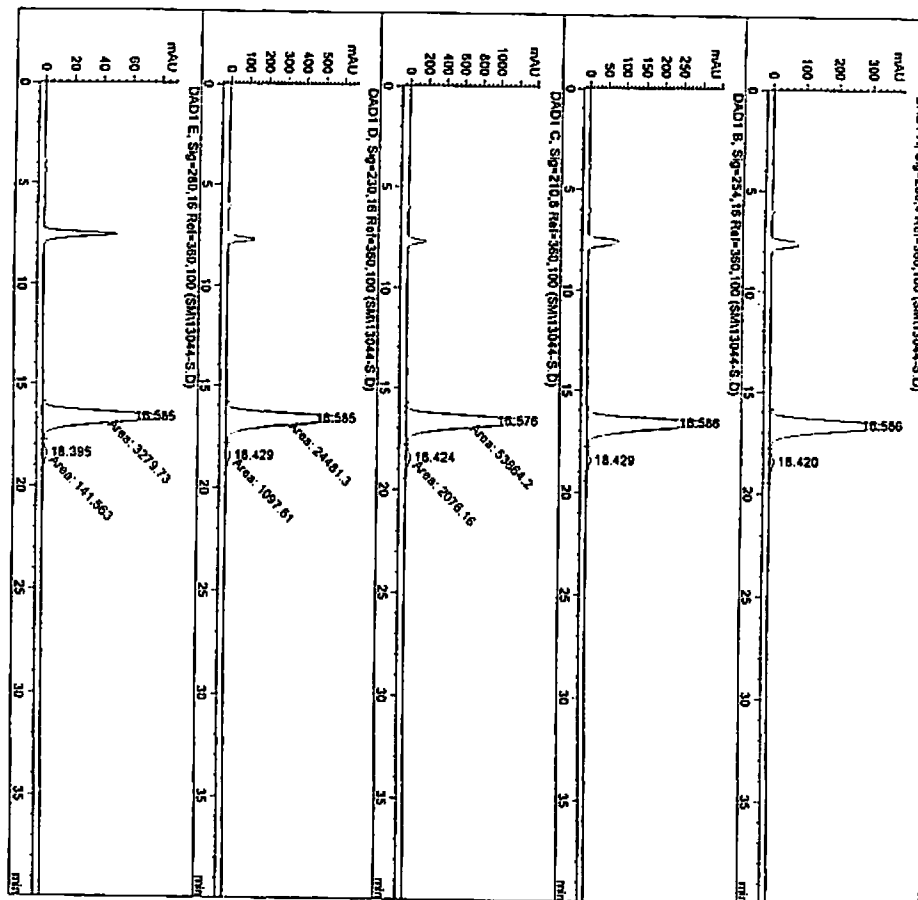

## Area Percent Report

Sorted By :  
 Multiplier : 1.0000  
 Dilution : 1.0000  
 Use Multiplier & Dilution factor with ISTDs

Signal 1: DMD1 A, Sig=250.4 Ref=360.100

| Peak #   | Retention Time (min) | Width (min) | Area (mAU*s) | Height (mAU) | Area %  |
|----------|----------------------|-------------|--------------|--------------|---------|
| 1        | 16.586               | 0.5796      | 1.420144     | 380.39679    | 96.5013 |
| 2        | 18.420               | 0.5168      | 514.88049    | 11.94796     | 3.4987  |
| Totals : |                      |             | 1.471624     | 392.34475    |         |

Results obtained with enhanced integrator!

Signal 2: DMD1 B, Sig=254.16 Ref=360.100

| Peak #   | Retention Time (min) | Width (min) | Area (mAU*s) | Height (mAU) | Area %  |
|----------|----------------------|-------------|--------------|--------------|---------|
| 1        | 16.586               | 0.5776      | 1.253334     | 335.69812    | 96.5001 |
| 2        | 18.429               | 0.5341      | 454.56274    | 10.56262     | 3.4999  |
| Totals : |                      |             | 1.298794     | 346.26074    |         |

Results obtained with enhanced integrator!

Signal 3: DMD1 C, Sig=210.8 Ref=360.100

| Peak #   | Retention Time (min) | Width (min) | Area (mAU*s) | Height (mAU) | Area %  |
|----------|----------------------|-------------|--------------|--------------|---------|
| 1        | 16.576               | 0.6490      | 5.386424     | 1383.25171   | 96.2886 |
| 2        | 18.424               | 0.7183      | 2076.15698   | 48.17566     | 3.7114  |
| Totals : |                      |             | 5.594034     | 1431.42736   |         |

Results obtained with enhanced integrator!

Signal 4: DMD1 D, Sig=230.16 Ref=360.100

| Peak #   | Retention Time (min) | Width (min) | Area (mAU*s) | Height (mAU) | Area %  |
|----------|----------------------|-------------|--------------|--------------|---------|
| 1        | 16.585               | 0.6316      | 2.148134     | 646.05109    | 95.7089 |
| 2        | 18.429               | 0.7944      | 1097.61475   | 23.02757     | 4.2911  |
| Totals : |                      |             | 2.557904     | 669.07866    |         |

Results obtained with enhanced integrator!

Signal 5: DMD1 E, Sig=280.16 Ref=360.100

| Peak #   | Retention Time (min) | Width (min) | Area (mAU*s) | Height (mAU) | Area %  |
|----------|----------------------|-------------|--------------|--------------|---------|
| 1        | 16.585               | 0.6260      | 3279.72900   | 87.32043     | 95.8623 |
| 2        | 18.395               | 0.7892      | 141.56334    | 2.98963      | 4.1377  |
| Totals : |                      |             | 3421.29234   | 90.31006     |         |

AD-H

Injection Date : 2/12/2009 9:52:18 AM  
 Sample Name :  
 Acq. Operator : SM  
 Acq. Instrument : Instrument 1  
 Different Inj Volume from Sequence :  
 Acq. Method : C:\HPCHEM\1\METHODS\05-90-1.M  
 Last changed : 2/12/2009 9:54:19 AM by SM  
 (modified after loading)  
 Analysis Method : C:\HPCHEM\1\METHODS\01-75-1.M  
 Last changed : 2/10/2009 4:07:32 PM by SM

Table 2, entry 6

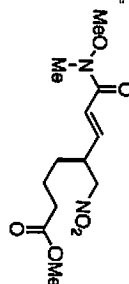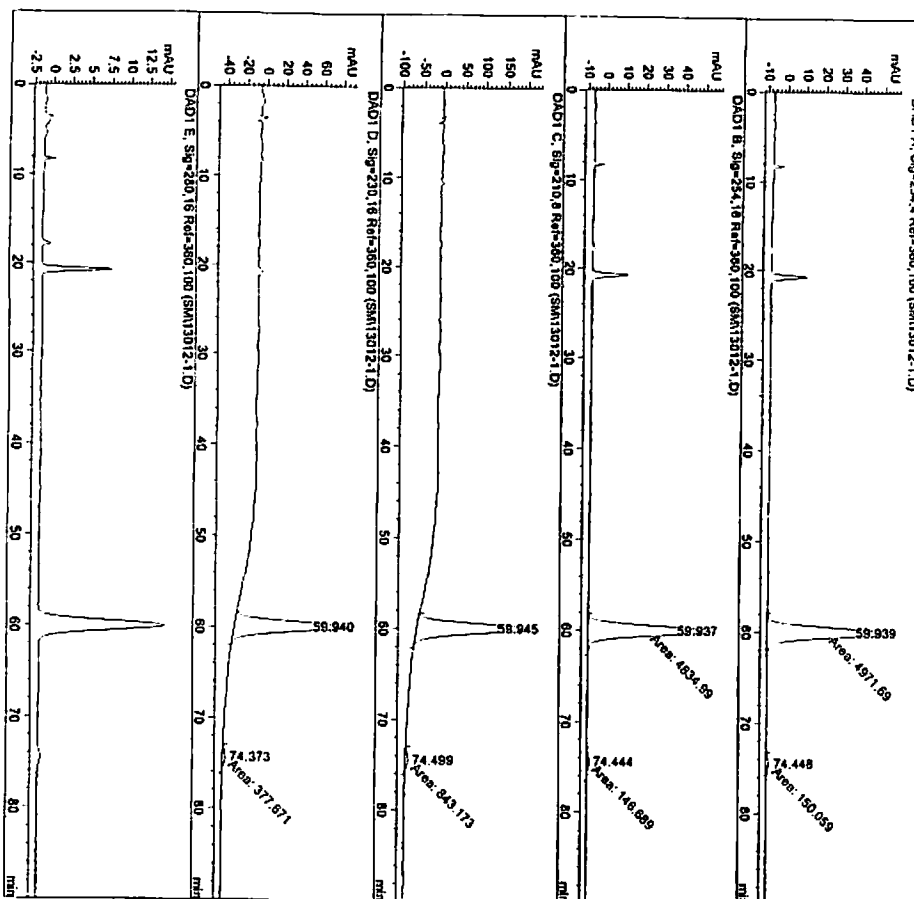

## Area Percent Report

Sorted By :  
 Multiplier : 1.0000  
 Dilution : 1.0000  
 Use Multiplier & Dilution Factor with ISTDs

Signal 1: DAD1 A, Sig=254,4 Ref=360,100

| Peak #   | RetTime [min] | Type | Width [min] | Area [mAU*s] | Height [mAU] | Area %  |
|----------|---------------|------|-------------|--------------|--------------|---------|
| 1        | 59.939        | MM   | 1.2985      | 4971.69385   | 63.81089     | 97.0702 |
| 2        | 74.448        | MM   | 1.6971      | 150.05936    | 1.67054      | 2.9298  |
| Totals : |               |      |             | 5121.75320   | 65.48144     |         |

Results obtained with enhanced integrator:

Signal 2: DAD1 B, Sig=254,16 Ref=360,100

| Peak #   | RetTime [min] | Type | Width [min] | Area [mAU*s] | Height [mAU] | Area %  |
|----------|---------------|------|-------------|--------------|--------------|---------|
| 1        | 59.937        | MM   | 1.2812      | 4834.5926    | 62.89619     | 97.0554 |
| 2        | 74.444        | MM   | 1.6270      | 146.68878    | 1.50263      | 2.9446  |
| Totals : |               |      |             | 4981.67804   | 64.39882     |         |

Results obtained with enhanced integrator:

Signal 3: DAD1 C, Sig=210,8 Ref=360,100

| Peak #   | RetTime [min] | Type | Width [min] | Area [mAU*s] | Height [mAU] | Area %  |
|----------|---------------|------|-------------|--------------|--------------|---------|
| 1        | 59.945        | VV   | 0.9086      | 2.13515e4    | 276.27301    | 96.2010 |
| 2        | 74.499        | MM   | 1.7707      | 843.17291    | 7.93630      | 3.7990  |
| Totals : |               |      |             | 2.21947e4    | 284.20931    |         |

Results obtained with enhanced integrator:

Signal 4: DAD1 D, Sig=230,16 Ref=360,100

| Peak #   | RetTime [min] | Type | Width [min] | Area [mAU*s] | Height [mAU] | Area %  |
|----------|---------------|------|-------------|--------------|--------------|---------|
| 1        | 59.940        | BP   | 1.0500      | 8946.74707   | 116.75940    | 95.9497 |
| 2        | 74.373        | MM   | 1.9100      | 377.67056    | 3.29563      | 4.0503  |
| Totals : |               |      |             | 9324.41763   | 120.05503    |         |

Results obtained with enhanced integrator:

Signal 5: DAD1 E, Sig=280,16 Ref=360,100

\*\*\* End of Report \*\*\*

Injection Date : 2/17/2009 5:24:47 PM  
 Sample Name :  
 Acq. Operator : SM  
 Acq. Instrument : Instrument 1  
 Different Inj Volume from Sequence : Actual Inj Volume : 5 µl  
 Acq. Method : C:\HPCHEM\1\METHODS\05-90-1.M  
 Last changed : 2/17/2009 6:37:47 PM by SM  
 (modified after loading)  
 Analysis Method : C:\HPCHEM\1\METHODS\05-20-1.M  
 Last changed : 12/14/2008 2:53:35 PM by sj  
 DAD1 A, Sig=254,16 Ref=360,100 (SM\13030-S.D)

Table 2, entry 7

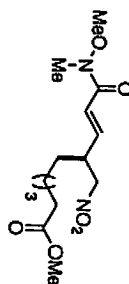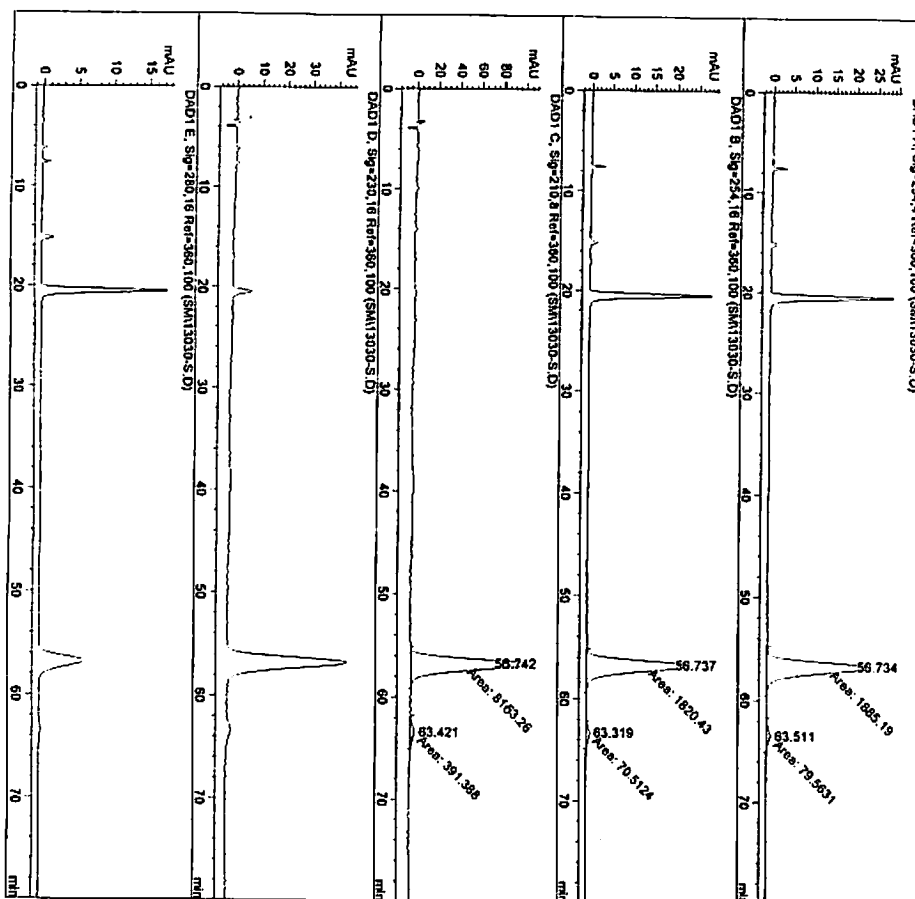

## Area Percent Report

Sorted By :  
 Multiplier : 1.0000  
 Dilution : 1.0000  
 Use Multiplier & Dilution Factor with ISTDs

Signal 1: DAD1 A, Sig=254,16 Ref=360,100

| Peak #   | RetTime [min] | Type | Width [min] | Area [mAU*s] | Height [mAU] | Area %  |
|----------|---------------|------|-------------|--------------|--------------|---------|
| 1        | 56.734        | MM   | 1.2661      | 1885.18872   | 24.81620     | 95.9505 |
| 2        | 63.511        | MM   | 1.3438      | 79.56310     | 9.86770e-1   | 4.0495  |
| Totals : |               |      |             | 1964.75182   | 25.80297     |         |

Results obtained with enhanced integrator!

Signal 2: DAD1 B, Sig=254,16 Ref=360,100

| Peak #   | RetTime [min] | Type | Width [min] | Area [mAU*s] | Height [mAU] | Area %  |
|----------|---------------|------|-------------|--------------|--------------|---------|
| 1        | 56.737        | MM   | 1.2441      | 1820.43127   | 24.38770     | 96.2710 |
| 2        | 63.319        | MM   | 1.3321      | 70.51237     | 8.82234e-1   | 3.7290  |
| Totals : |               |      |             | 1890.94364   | 25.20993     |         |

Results obtained with enhanced integrator!

Signal 3: DAD1 C, Sig=210,8 Ref=360,100

| Peak #   | RetTime [min] | Type | Width [min] | Area [mAU*s] | Height [mAU] | Area %  |
|----------|---------------|------|-------------|--------------|--------------|---------|
| 1        | 56.742        | MM   | 1.2512      | 8163.25781   | 108.73572    | 95.4248 |
| 2        | 63.421        | MM   | 1.5687      | 391.38015    | 4.15827      | 4.5752  |
| Totals : |               |      |             | 8554.64597   | 112.89398    |         |

Results obtained with enhanced integrator!

Signal 4: DAD1 D, Sig=230,16 Ref=360,100

Signal 5: DAD1 E, Sig=280,16 Ref=360,100

\*\*\* End of Report \*\*\*

AD-H

Injection Date : 2/11/2009 6:34:37 PM  
 Sample Name :  
 Acq. Operator : SM  
 Acq. Instrument : Instrument 1  
 Different Inj Volume from Sequence :  
 Acq. Method : C:\VHPCHEM\1\METHODS\05-90-1.M  
 Last changed : 2/11/2009 6:08:05 PM by SM  
 Analysis Method : C:\VHPCHEM\1\METHODS\01-75-1.M  
 Last changed : 2/10/2009 4:07:32 PM by SM

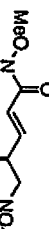

Table 2, entry 8

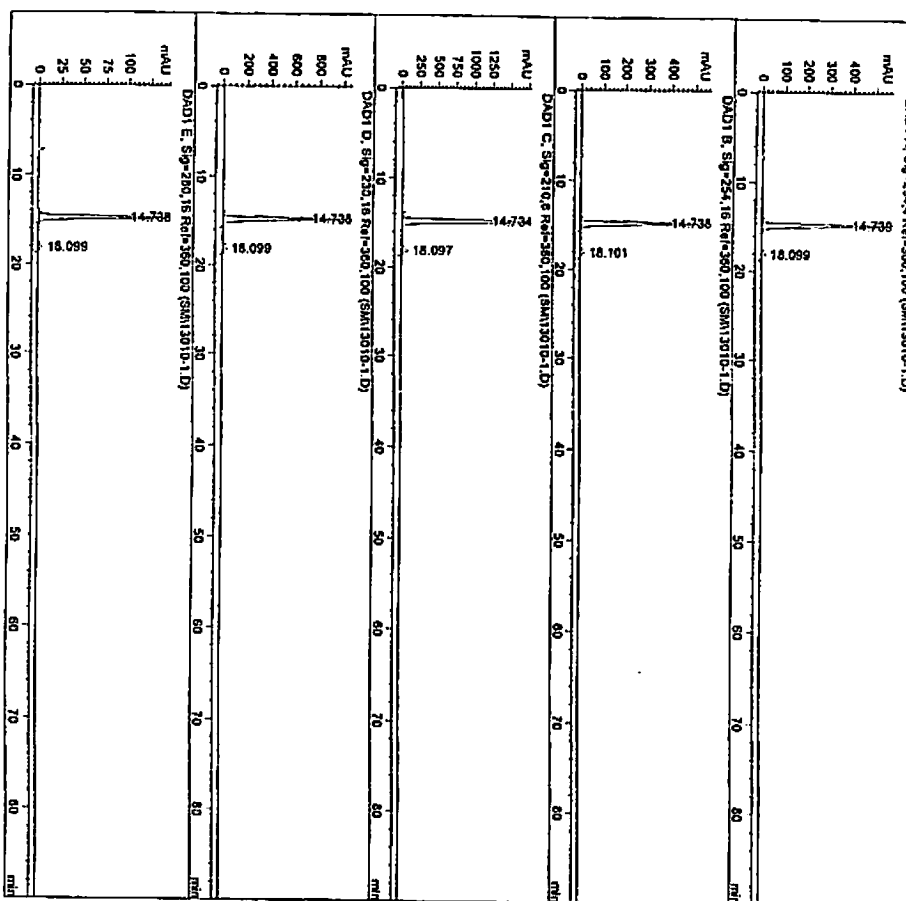

## Area Percent Report

Sorted By :  
 Multiplier : 1.0000  
 Dilution : 1.0000  
 Use Multiplier & Dilution Factor with ISTDs

Signal 1: DAD1 A, Sig=254,16 Ref=360,100

| Peak     | RetTime | Type | Width  | Area      | Height    | Area %  |
|----------|---------|------|--------|-----------|-----------|---------|
| #        | [min]   |      | [min]  | [mAU*s]   | [mAU]     | %       |
| 1        | 14.739  | BB   | 0.3246 | 1.15140e4 | 549.25677 | 95.9999 |
| 2        | 18.099  | BB   | 0.3787 | 479.75781 | 19.66072  | 4.0001  |
| Totals : |         |      |        | 1.19937e4 | 568.91749 |         |

Results obtained with enhanced integrator:

Signal 2: DAD1 B, Sig=254,16 Ref=360,100

| Peak     | RetTime | Type | Width  | Area      | Height    | Area %  |
|----------|---------|------|--------|-----------|-----------|---------|
| #        | [min]   |      | [min]  | [mAU*s]   | [mAU]     | %       |
| 1        | 14.738  | BB   | 0.3244 | 1.14076e4 | 544.44757 | 96.0089 |
| 2        | 18.101  | BB   | 0.3789 | 474.21553 | 19.41656  | 3.9911  |
| Totals : |         |      |        | 1.18818e4 | 563.86413 |         |

Results obtained with enhanced integrator:

Signal 3: DAD1 C, Sig=210,8 Ref=360,100

| Peak     | RetTime | Type | Width  | Area       | Height     | Area %  |
|----------|---------|------|--------|------------|------------|---------|
| #        | [min]   |      | [min]  | [mAU*s]    | [mAU]      | %       |
| 1        | 14.734  | BB   | 0.3944 | 4.22315e4  | 1696.68774 | 95.2896 |
| 2        | 18.097  | BB   | 0.3708 | 2087.61768 | 86.13805   | 4.7104  |
| Totals : |         |      |        | 4.43191e4  | 1782.82580 |         |

Results obtained with enhanced integrator:

Signal 4: DAD1 D, Sig=230,16 Ref=360,100

| Peak     | RetTime | Type | Width  | Area      | Height     | Area %  |
|----------|---------|------|--------|-----------|------------|---------|
| #        | [min]   |      | [min]  | [mAU*s]   | [mAU]      | %       |
| 1        | 14.738  | BB   | 0.3303 | 2.16140e4 | 1015.39569 | 96.0174 |
| 2        | 18.099  | BB   | 0.3714 | 896.49451 | 37.17045   | 3.9826  |
| Totals : |         |      |        | 2.25104e4 | 1052.56614 |         |

Results obtained with enhanced integrator:

Signal 5: DAD1 E, Sig=280,16 Ref=360,100

| Peak     | RetTime | Type | Width  | Area       | Height    | Area %  |
|----------|---------|------|--------|------------|-----------|---------|
| #        | [min]   |      | [min]  | [mAU*s]    | [mAU]     | %       |
| 1        | 14.738  | BB   | 0.3204 | 2920.27173 | 140.53752 | 96.0468 |
| 2        | 18.099  | BB   | 0.3360 | 120.19625  | 4.97301   | 3.9532  |
| Totals : |         |      |        | 3040.46798 | 145.51055 |         |

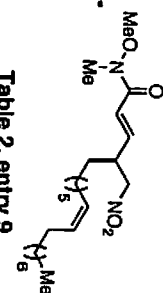

Table 2, entry 9

Injection Date : 2/10/2009 8:51:42 PM  
 Sample Name :  
 Acq. Operator : SM  
 Acq. Instrument : Instrument 1  
 Different Inj Volume from Sequence :  
 Method : C:\HPCHEM\1\METHODS\01-75-1.M  
 Last Changed : 2/10/2009 4:01:32 PM by SM  
 Seq. Line : 7  
 Location : Vial 3  
 Inj : 1  
 Inj Volume : 5 µl  
 Actual Inj Volume : 8 µl

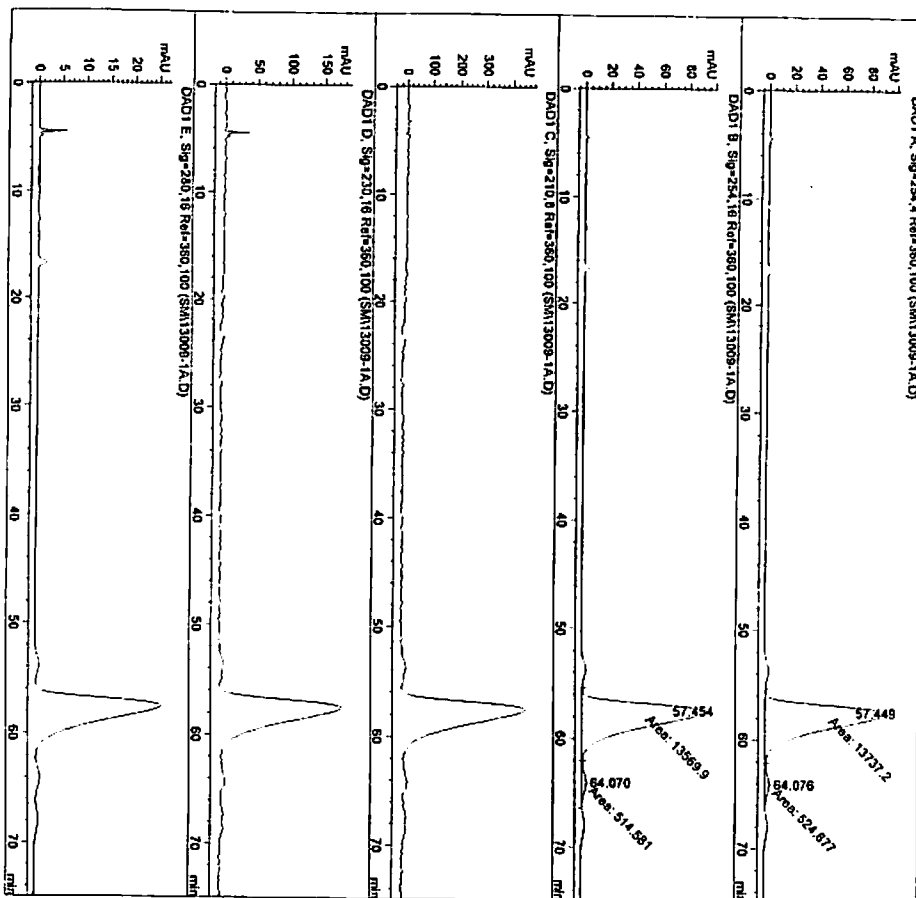

## Area Percent Report

Sorted By : signal  
 Multiplier : 1.0000  
 Dilution : 1.0000  
 Use Multiplier & Dilution Factor with ISTDs

| Signal                        | Peak RetTime (min) | Width (min) | Area (mAU*s) | Height (mAU) | Area %  |
|-------------------------------|--------------------|-------------|--------------|--------------|---------|
| DAD1 A, Sig=254.4 Ref=360.100 | 57.448             | 2.3473      | 1.3732e4     | 97.54067     | 96.3211 |
|                               | 64.076             | 2.2343      | 524.67651    | 3.91379      | 3.6789  |
| Totals :                      |                    |             | 1.42619e4    | 101.45446    |         |

Results obtained with enhanced integrator:

Signal 2: DAD1 B, Sig=254.16 Ref=360.100

| Peak RetTime (min) | Type | Width (min) | Area (mAU*s) | Height (mAU) | Area %  |
|--------------------|------|-------------|--------------|--------------|---------|
| 57.454             | MF   | 2.3463      | 1.35699e4    | 96.39020     | 96.3465 |
| 64.076             | FM   | 2.2276      | 514.58142    | 3.85001      | 3.6535  |
| Totals :           |      |             | 1.40844e4    | 100.24020    |         |

Results obtained with enhanced integrator:

Signal 3: DAD1 C, Sig=210.8 Ref=360.100

Signal 4: DAD1 D, Sig=230.16 Ref=360.100

Signal 5: DAD1 E, Sig=280.16 Ref=360.100

\*\*\* End of Report \*\*\*

Injection Date : 2/20/2009 10:29:16 PM  
 Sample Name :  
 Acq. Operator : SM  
 Acq. Instrument : Instrument 1  
 Different Inj Volume from Sequence :  
 Acq. Method : C:\HPCHEM\1\METHODS\02-40-1.M  
 Last changed : 3/3/2007 9:41:51 AM by XD  
 Analysis Method : C:\HPCHEM\1\METHODS\05-20-1.M  
 Last changed : 12/14/2008 2:53:35 PM by sl

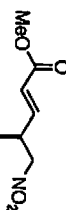

Table 3, entry 1

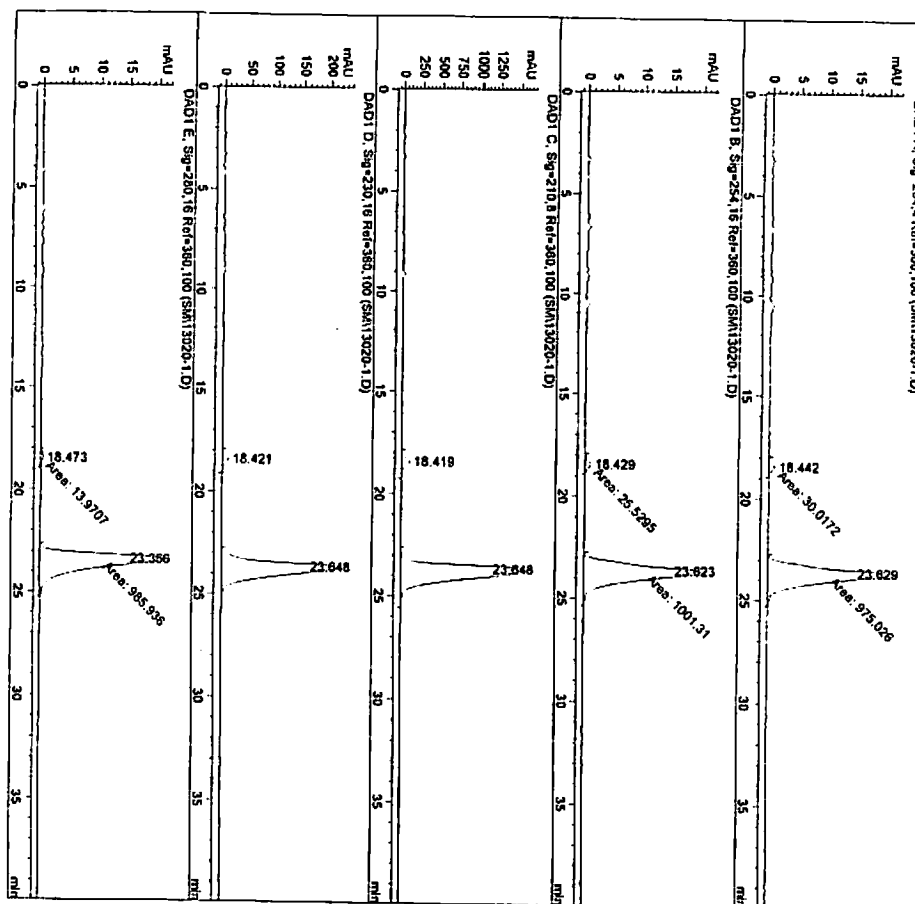

## Area Percent Report

Sorted By :  
 Multiplier : 1.0000  
 Dilution : 1.0000  
 Use Multiplier & Dilution Factor with ISTDs

Signal 1: DAD1 A, Sig=254.4 Ref=360.100

| Peak #   | RetTime [min] | Width [min] | Area [mAU*s] | Height [mAU] | Area % |
|----------|---------------|-------------|--------------|--------------|--------|
| 1        | 18.442        | 0.4747      | 30.01718     | 1.05398      | 2.967  |
| 2        | 23.629        | 0.7619      | 975.02582    | 21.32962     | 97.013 |
| Totals : |               |             | 1005.04300   | 22.38360     |        |

Results obtained with enhanced integrator:

Signal 2: DAD1 B, Sig=254.16 Ref=360.100

| Peak #   | RetTime [min] | Width [min] | Area [mAU*s] | Height [mAU] | Area %  |
|----------|---------------|-------------|--------------|--------------|---------|
| 1        | 18.429        | 0.4337      | 25.52950     | 9.81158e-1   | 2.4862  |
| 2        | 23.623        | 0.7694      | 1001.31482   | 21.69151     | 97.5138 |
| Totals : |               |             | 1026.84432   | 22.67267     |         |

Results obtained with enhanced integrator:

Signal 3: DAD1 C, Sig=210.8 Ref=360.100

| Peak #   | RetTime [min] | Width [min] | Area [mAU*s] | Height [mAU] | Area %  |
|----------|---------------|-------------|--------------|--------------|---------|
| 1        | 18.419        | 0.4093      | 2961.02026   | 108.87658    | 3.8205  |
| 2        | 23.648        | 0.5992      | 7.45419e4    | 1624.98608   | 96.1795 |
| Totals : |               |             | 7.75029e4    | 1733.86266   |         |

Results obtained with enhanced integrator:

Signal 4: DAD1 D, Sig=230.16 Ref=360.100

| Peak #   | RetTime [min] | Width [min] | Area [mAU*s] | Height [mAU] | Area %  |
|----------|---------------|-------------|--------------|--------------|---------|
| 1        | 18.421        | 0.3775      | 318.10266    | 11.83834     | 3.1625  |
| 2        | 23.648        | 0.6192      | 9740.58594   | 229.49974    | 96.8375 |
| Totals : |               |             | 1.00587e4    | 241.33808    |         |

Results obtained with enhanced integrator:

Signal 5: DAD1 E, Sig=280.16 Ref=360.100

| Peak #   | RetTime [min] | Width [min] | Area [mAU*s] | Height [mAU] | Area %  |
|----------|---------------|-------------|--------------|--------------|---------|
| 1        | 18.473        | 0.5180      | 13.97071     | 4.49494e-1   | 1.3972  |
| 2        | 23.366        | 0.7677      | 985.93646    | 21.40515     | 98.6028 |
| Totals : |               |             | 999.90717    | 21.85465     |         |

Injection Date : 2/12/2009 9:13:50 PM  
 Sample Name :  
 Acq. Operator : SM  
 Acq. Instrument : Instrument 1  
 Different Inj Volume from Sequence : Actual Inj Volume : 5 µl  
 Acq. Method : C:\HPCHEM\1\METHODS\01-20-1.M  
 Last changed : 6/6/2008 2:46:18 PM by SM  
 Analysis Method : C:\HPCHEM\1\METHODS\01-75-1.M  
 Last changed : 2/10/2009 4:07:32 PM by SM

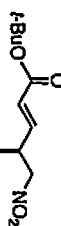

Table 3, entry 2

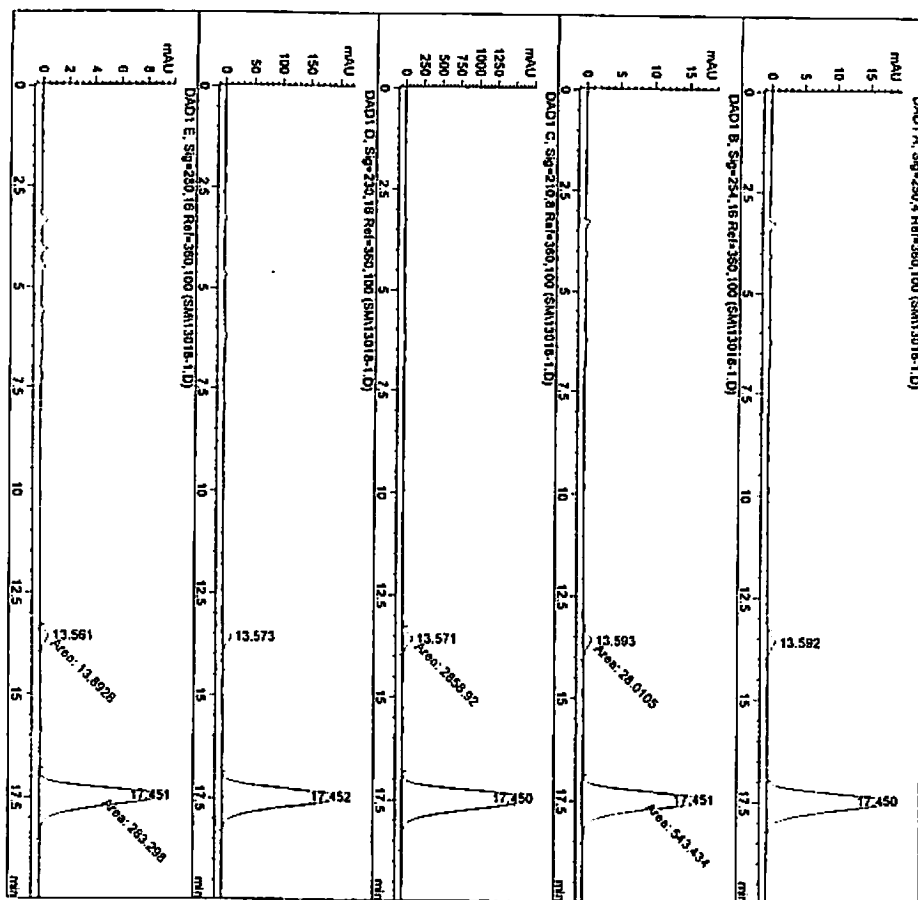

## Area Percent Report

Sorted By :  
 Multiplier : 1.0000  
 Dilution : 1.0000  
 Use Multiplier & Dilution Factor with ISTDs

| Peak     | RetTime | Type | Width  | Area      | Height   | Area    |
|----------|---------|------|--------|-----------|----------|---------|
| #        | [min]   |      | [min]  | [mAU*s]   | [mAU]    | %       |
| 1        | 13.592  | PB   | 0.2515 | 24.54738  | 1.17634  | 4.2671  |
| 2        | 17.450  | BB   | 0.4138 | 548.03314 | 18.92690 | 95.7129 |
| Totals : |         |      |        | 572.58052 | 20.10324 |         |

Results obtained with enhanced integrator!

| Peak     | RetTime | Type | Width  | Area      | Height   | Area    |
|----------|---------|------|--------|-----------|----------|---------|
| #        | [min]   |      | [min]  | [mAU*s]   | [mAU]    | %       |
| 1        | 13.593  | MM   | 0.3823 | 28.01051  | 1.22115  | 4.9017  |
| 2        | 17.451  | MM   | 0.4931 | 543.43402 | 18.36876 | 95.0983 |
| Totals : |         |      |        | 571.44453 | 19.58991 |         |

Results obtained with enhanced integrator!

| Peak     | RetTime | Type | Width  | Area       | Height     | Area    |
|----------|---------|------|--------|------------|------------|---------|
| #        | [min]   |      | [min]  | [mAU*s]    | [mAU]      | %       |
| 1        | 13.571  | MM   | 0.3551 | 2858.91895 | 134.20009  | 4.9956  |
| 2        | 17.450  | BB   | 0.5061 | 5.43695e4  | 1886.35282 | 95.0044 |
| Totals : |         |      |        | 5.72284e4  | 1820.55251 |         |

Results obtained with enhanced integrator!

| Peak     | RetTime | Type | Width  | Area       | Height    | Area    |
|----------|---------|------|--------|------------|-----------|---------|
| #        | [min]   |      | [min]  | [mAU*s]    | [mAU]     | %       |
| 1        | 13.573  | BP   | 0.3365 | 313.62592  | 14.37480  | 4.7328  |
| 2        | 17.452  | PB   | 0.4556 | 6312.99707 | 214.35719 | 95.2672 |
| Totals : |         |      |        | 6626.62299 | 228.73199 |         |

Results obtained with enhanced integrator!

| Peak     | RetTime | Type | Width  | Area      | Height     | Area    |
|----------|---------|------|--------|-----------|------------|---------|
| #        | [min]   |      | [min]  | [mAU*s]   | [mAU]      | %       |
| 1        | 13.561  | MM   | 0.3605 | 13.89283  | 6.42298e-1 | 4.6747  |
| 2        | 17.451  | MM   | 0.4942 | 283.29761 | 9.55461    | 95.3253 |
| Totals : |         |      |        | 297.19044 | 10.19690   |         |

Injection Date : 2/13/2009 7:58:08 PM  
 Sample Name :  
 Acq. Operator : SM  
 Acq. Instrument : Instrument 1  
 Different Inj Volume from Sequence : Actual Inj Volume : 6 µl  
 Acq. Method : C:\HPCHEM\1\METHODS\02-60-1.M  
 Last changed : 8/31/2008 3:07:52 PM by CR  
 Analysis Method : C:\HPCHEM\1\METHODS\01-75-1.M  
 Last changed : 2/10/2009 4:07:32 PM by SM

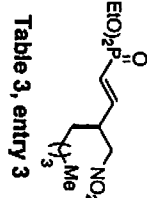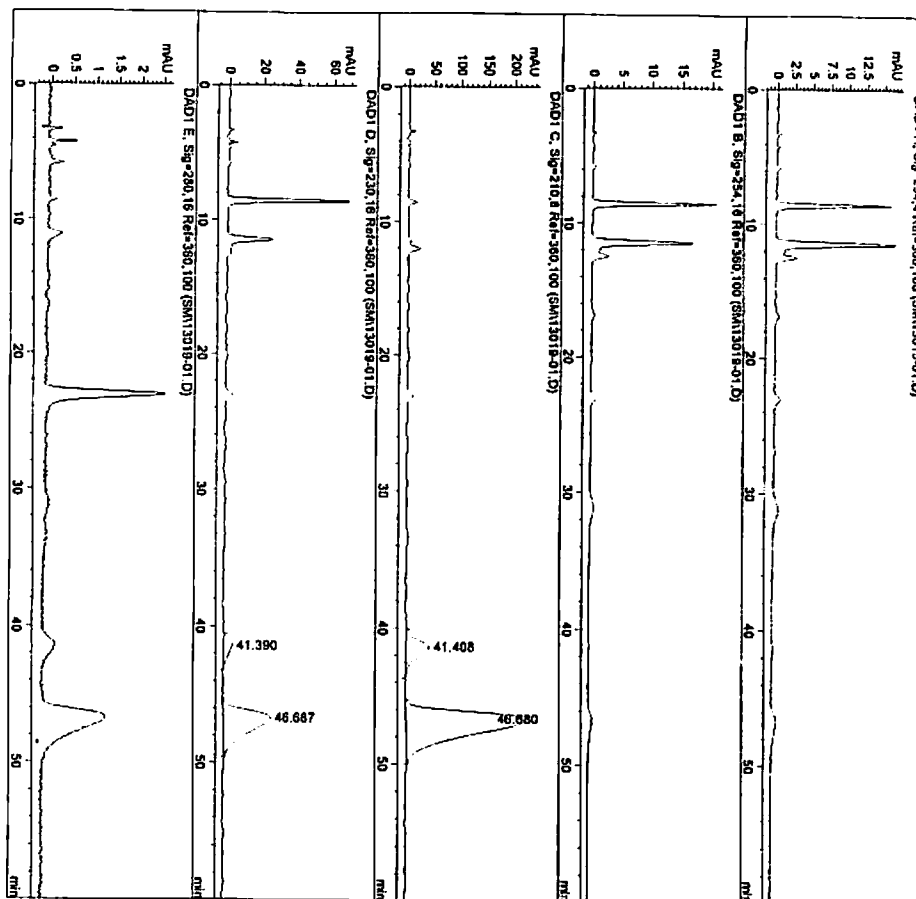

## Area Percent Report

Sorted By : Signal  
 Multiplier : 1.0000  
 Dilution : 1.0000  
 Use Multiplier & Dilution Factor with ISTDs

Signal 1: DAD1 A, Sig=254,4 Ref=360,100

Signal 2: DAD1 B, Sig=254,16 Ref=360,100

Signal 3: DAD1 C, Sig=210,8 Ref=360,100

| Peak # | RetTime [min] | Type | Width [min] | Area [mAU*s] | Height [mAU] | Area %  |
|--------|---------------|------|-------------|--------------|--------------|---------|
| 1      | 41.408        | VP   | 1.0040      | 3789.84009   | 44.83234     | 12.4095 |
| 2      | 46.680        | VB   | 1.3280      | 2.67429e4    | 237.45172    | 87.5905 |

Totals : 3.05318e4 282.28407

Results obtained with enhanced integrator!

Signal 4: DAD1 D, Sig=230,16 Ref=360,100

| Peak # | RetTime [min] | Type | Width [min] | Area [mAU*s] | Height [mAU] | Area %  |
|--------|---------------|------|-------------|--------------|--------------|---------|
| 1      | 41.390        | BB   | 0.9385      | 395.13983    | 4.98633      | 11.6755 |
| 2      | 46.687        | PB   | 1.3101      | 2989.18727   | 26.90652     | 88.3245 |

Totals : 3384.33710 31.89284

Results obtained with enhanced integrator!

Signal 5: DAD1 E, Sig=280,16 Ref=360,100

\*\*\* End of Report \*\*\*
